# Supplementary material for: Hydrogen bonding and non-covalent interaction assisted nickel(0) catalysed reversible alkenyl functional group swapping: a computational study
Source: Royal Society of Chemistry journal article supplement (doi:10.1039/c9cy02486g), 2020-01-01
Supplement: c9cy02486g1.pdf [file c9cy02486g1.pdf]

# **Hydrogen Bonding and Non-Covalent Interactions Assisted Nickel (0) Catalysed Reversible Alkenyl Functional Group Swapping: A Computational Study**

Pooja Jain<sup>a</sup>, Rahul K. Shukla<sup>a</sup>, Sourav Pal<sup>a,b</sup> and Vidya Avasare<sup>\*c</sup>

<sup>a</sup> Department of Chemistry, Indian Institution of Technology Bombay, Mumbai 400076,  
India

<sup>b</sup> Indian Institute of Science education and Research Kolkata, Mohanpur- 741246, Naida,  
West Bengal, India.

<sup>c</sup> Department of Chemistry, Sir Parashurambhau College, Pune-411030, India

\* [vidya.avasare@gmail.com](mailto:vidya.avasare@gmail.com)

## Table of Contents

| Page No.              | List of Figures  |                                                                                                                                                                                                                                                                                                                      |
|-----------------------|------------------|----------------------------------------------------------------------------------------------------------------------------------------------------------------------------------------------------------------------------------------------------------------------------------------------------------------------|
| <b>S3</b>             | <b>Fig. S1</b>   | Different possibilities studied for the identification of the active catalytic species                                                                                                                                                                                                                               |
| <b>S5</b>             | <b>Fig. S2</b>   | Illustration of interaction and distortion energies in the Activation Strain Analysis for C(2)-C(3) bond cleavage step leading to the formation of nickel complex coordinated by an alkene and imine via the five member transition state.                                                                           |
| <b>S6</b>             | <b>Fig. S3</b>   | The reaction profile along the intrinsic reaction coordinate (IRC) trajectory starting from <b>[8a-9a]</b> <sup>‡</sup> (shown above) and <b>[8-9]</b> <sup>‡</sup> (shown below) as obtained at the SMD(Hexane)/B3LYP-D3/SDD(Ni),6-31G** level of theory for the C-C bond cleavage step.                            |
| <b>List of Tables</b> |                  |                                                                                                                                                                                                                                                                                                                      |
| <b>S3</b>             | <b>Table S1</b>  | The Calculation of Energetic Span ( $\delta E$ , in kcal/mol) using Different Combination of TDI and TDTS (highlighted ones give the maximum energetic span)                                                                                                                                                         |
| <b>S6</b>             | <b>Table S2.</b> | Relative Distortion and Interaction Energies (in kcal/mol) for the C-C bond cleavage Step at the SMD(Hexane)/B3LYP-D3/SDD(Ni),6-31G** Level of Theory. The IRC points toward the product side ( <b>P1, P2</b> ,...) and the reactant side ( <b>R1, R2</b> , ...) along thereaction coordinate are shown in Figure S8 |
| <b>S7</b>             | <b>Table S3</b>  | Gibbs free energies ( $\Delta G$ in kcal/mol) of intermediates and transition states at (i)SMD(hexane)/M06/SDD(N),6311++G**//SMD(hexane)/B3LYP-D3/SDD(Ni),6-31G** and (ii)SMD(hexane)/M06/LANL2DZ(Ni),6-311++G**//SMD(hexane)/B3LYP-D3/SDD(Ni),6-31G** level of theory                                               |
| <b>S8</b>             | <b>Table S4</b>  | Gibbs Free Energies of Various Species (in hartree) Involved in the Computation of the Overall Free Energy Change of the Reaction Obtained at the SMD(hexane)/B3LYPD3/ SDD(Ni),6-31G** Level of Theory                                                                                                               |
| <b>S9-S111</b>        |                  | The Optimized Coordinates of all the Stationary Points obtained at the SMD(hexane)/B3LYPD3/6-31G** Level of Theory                                                                                                                                                                                                   |

## 1. Different Possibilities studied for the Identification of Potential Catalytic Active Species

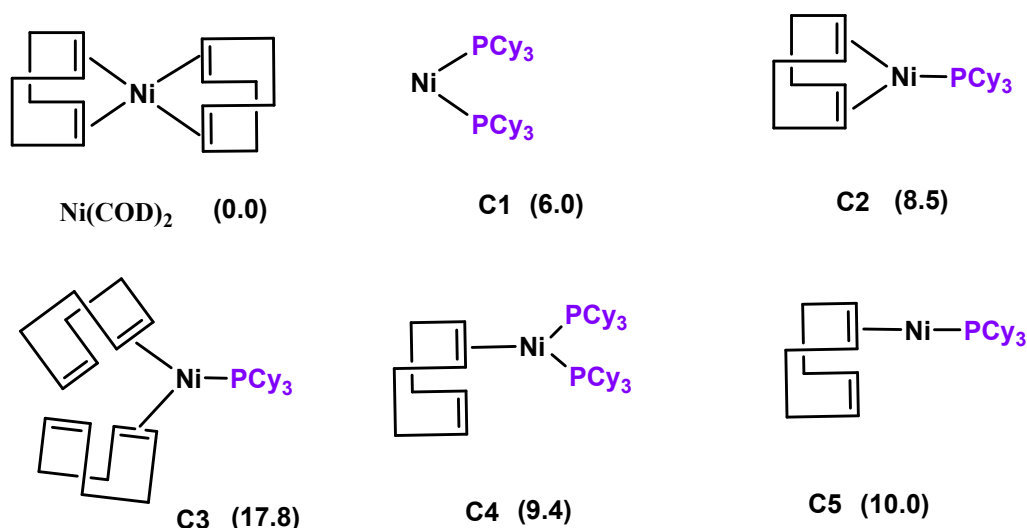

**Fig. S1** Various ligand combinations around Ni considered for the identification of potential active catalyst and the corresponding relative Gibbs free energies obtained at the SMD(hexane)/ B3LYP-D3/SDD(Ni),6-31G\*\* level of theory. The energies are calculated with Ni(COD)<sub>2</sub> as the reference.

## 2. Energetic span model

We have calculated the energy span using the energetic span model developed by Shaik and Kozuch which convey the turnover frequency (TOF) of a catalytic cycle using energetic of various stationary points. In the catalytic cycle, two states can be identified such as transition state and intermediate. The TOF of the catalytic cycle can be determined by these states. Therefore, the TOF of the catalytic cycle depends on the TOF-determining intermediate (TDI) and TOF-determining transition state (TDTS). The energy span  $\delta E$  can be calculated using the following equations:

$$\delta E = T_{\text{TDTS}} - I_{\text{TDI}} \quad (1), \text{ when the TDTS is after the TDI.}$$

**Table S1.** The Calculation of Energetic Span ( $\delta E$ , in kcal/mol) using Different Combination of TDI and TDTS (highlighted ones give the maximum energetic span)

| TDI | TDTS | $\delta E$ |
|-----|------|------------|
|-----|------|------------|

|           |            |       |
|-----------|------------|-------|
| <b>6</b>  | [3-4]‡     | 18.0  |
|           | [5-6]‡     | 10.2  |
|           | [8a-9a]‡   | 17.7  |
|           | [10a-11a]‡ | 19.0  |
|           | [12-13]‡   | 5.2   |
|           | [14-15]‡   | 31.6  |
|           |            |       |
| <b>12</b> | [3-4]‡     | 19.6  |
|           | [5-6]‡     | 11.8  |
|           | [8a-9a]‡   | 2.3   |
|           | [10a-11a]‡ | 2.9   |
|           | [12-13]‡   | 6.8   |
|           | [14-15]‡   | 33.2  |
|           |            |       |
| <b>13</b> | [3-4]‡     | 18.7  |
|           | [5-6]‡     | 10.9  |
|           | [8a-9a]‡   | 1.0   |
|           | [10a-11a]‡ | 2.3   |
|           | [12-13]‡   | 11.5  |
|           | [14-15]‡   | 32.3  |
|           |            |       |
| <b>15</b> | [3-4]‡     | 13.1  |
|           | [5-6]‡     | 5.3   |
|           | [8a-9a]‡   | -4.6  |
|           | [10a-11a]‡ | -3.6  |
|           | [12-13]‡   | -17.1 |
|           | [14-15]‡   | 9.3   |

### 3. Activation Strain Analysis

Following literature precedence, the activation barrier ( $\Delta E^\ddagger$ ) is splitting into (a) destabilizing distortion energy in the reactants ( $\Delta E_d^\ddagger$ ) and (b) stabilizing interaction energy between parallel distorted reactants ( $\Delta E_i^\ddagger$ ). The activation barrier can therefore be written as sum of the distortion and interaction energies,  $\Delta E^\ddagger = \Delta E_d^\ddagger + \Delta E_i^\ddagger$ . Distortion energy is calculated as the difference between the energies of the ground state geometries of undistorted reactants and the corresponding distorted structure in the transition state.

For this analysis, first we have access the reaction profile by performing the IRC calculations. After this single-point computations are done along the reaction coordinate. We have taken seven different points on the reaction coordinate to perform these calculations (**Figure S3**).

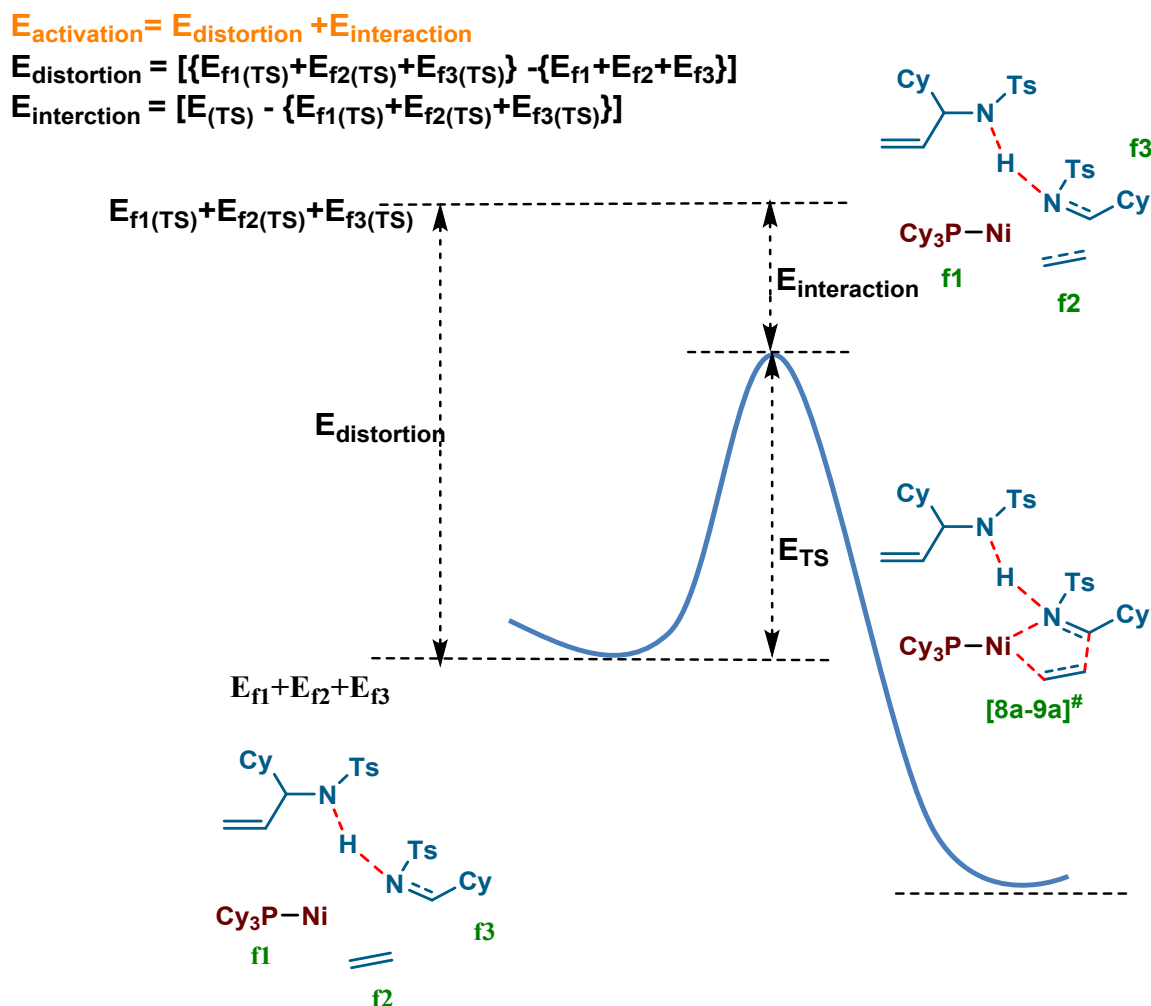

**Fig. S2** Illustration of interaction and distortion energies in the Activation Strain Analysis for C-C bond cleavage step leading to the formation of nickel complex coordinated by an alkene and imine via the five member transition state.

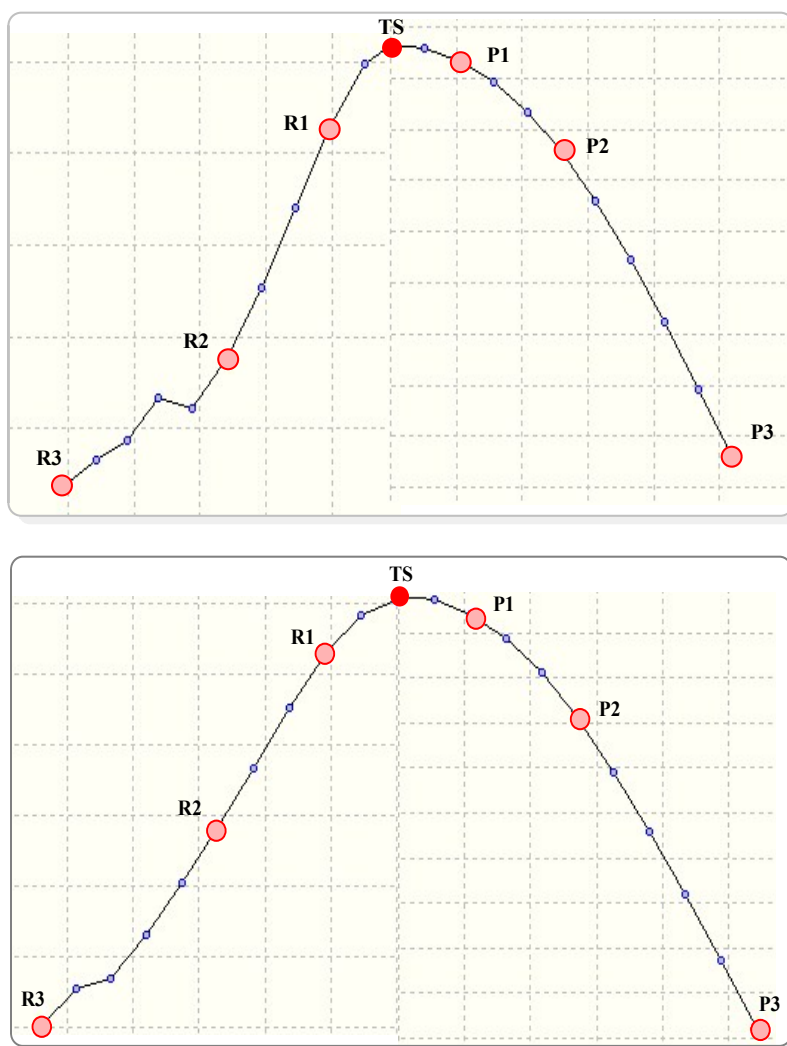

**Fig. S3** The reaction profile along the intrinsic reaction coordinate (IRC) trajectory starting from **[8a-9a]‡** (shown above) and **[8-9]‡**(shown below) as obtained at the SMD(Hexane)/B3LYP-D3/SDD(Ni),6-31G\*\* level of theory for the C-C bond cleavage step.

**Table S2.** Relative Distortion and Interaction Energies (in kcal/mol) for the C-C bond cleavage Step at the SMD(Hexane)/B3LYP-D3/SDD(Ni),6-31G\*\* Level of Theory. The IRC points toward the product side (**P1, P2,...**) and the reactant side (**R1, R2, ...**) along the reaction coordinate are shown in Figure S3

| Transition states (RE) | Distortion Energy ( $E_{\text{distortion}}$ ) |    |    | Total Distortion Energy | Interaction Energy ( $E_{\text{interaction}}$ ) | Activation Strain Energy ( $E_{\text{act}}$ ) |
|------------------------|-----------------------------------------------|----|----|-------------------------|-------------------------------------------------|-----------------------------------------------|
|                        | f1                                            | f2 | f3 |                         |                                                 |                                               |
|                        | f1                                            | f2 | f3 | f1+f2+f3                |                                                 |                                               |

|                 |      |       |       |        |         |        |
|-----------------|------|-------|-------|--------|---------|--------|
| <b>[8a-9a]‡</b> | 3.15 | 38.63 | 42.60 | 84.39  | -157.41 | -73.02 |
| P1              | 3.33 | 33.29 | 38.82 | 75.46  | -148.58 | -73.11 |
| P2              | 3.67 | 26.09 | 33.54 | 63.31  | -136.99 | -73.67 |
| P3              | 4.44 | 17.35 | 27.45 | 49.25  | -124.80 | -75.55 |
| R1              | 3.01 | 44.08 | 46.31 | 93.41  | -166.50 | -73.08 |
| R2              | 2.91 | 50.19 | 49.94 | 103.05 | -176.29 | -73.24 |
| R3              | 2.86 | 54.31 | 52.44 | 109.61 | -182.94 | -73.32 |
|                 |      |       |       |        |         |        |
| <b>[8-9]‡</b>   | 1.88 | 36.41 | 40.05 | 78.34  | -141.02 | -62.67 |
| P1              | 2.08 | 31.02 | 35.97 | 69.09  | -131.90 | -62.80 |
| P2              | 2.49 | 23.95 | 30.48 | 56.92  | -120.45 | -63.52 |
| P3              | 3.35 | 15.99 | 24.47 | 43.82  | -109.51 | -65.68 |
| R1              | 1.69 | 42.02 | 44.21 | 87.93  | -150.70 | -62.77 |
| R2              | 1.51 | 48.94 | 48.87 | 99.33  | -162.42 | -63.08 |
| R3              | 1.40 | 56.26 | 53.69 | 111.36 | -174.79 | -63.43 |

It is evident from the data given in Table S4 that the interaction energy is more stabilizing for the transition state **[8a-9a]‡** as compared to that in **[8-9]‡**. This can be mainly attributed to the larger number and more effective non-covalent interactions and hydrogen bonding present (O...H-C, C-H... $\pi$  and N...H) in **[8a-9a]‡** as shown in (AIM analysis).

For calculating the distortion energy, the overall system is divided into three fragments, f1, f2 and f3. In both the transition states f1 and f2 are same fragment, but f3 is different. In the transition state **[8a-9a]‡** the one extra tosylamine molecule stabilized the transition state. Here we explain on the basis of strain model, out of three fragments which is more destabilized the distortion energy. It can be noted from Table S2 that there is not much difference in the distortion energy of fragment f1 and f2 for both the transition states. Therefore, it is the fragment f3 that is contributing appreciably to the destabilizing distortion energy. A closer look at the transition state structures reveals that the distortion originates mainly from the five membered nickelacycle (tosylamine molecule).

**Table S3.** Gibbs free energies ( $\Delta G$  in kcal/mol) of intermediates and transition states at (i) SMD(hexane)/M06/SDD(Ni),6-311++G\*\*//SMD(hexane)/B3LYP-D3/SDD(Ni),6-31G\*\* and (ii) SMD(hexane)/M06/LANL2DZ(Ni),6-311++G\*\*//SMD(hexane)/B3LYP-D3/SDD(Ni),6-31G\*\* level of theory.

| Name | M06/SDD(Ni),6- | M06/LANL2DZ(Ni),6- |
|------|----------------|--------------------|
|------|----------------|--------------------|

|                   | 311++G**(SMD model) | 311++G*** (SMD model) |
|-------------------|---------------------|-----------------------|
| <b>C1</b>         | 0                   | 0                     |
| <b>3</b>          | 3.3                 | 2.9                   |
| <b>[3-4]‡</b>     | 26.5                | 26.5                  |
| <b>4</b>          | 18.1                | 20.2                  |
| <b>5</b>          | 1.5                 | 4.3                   |
| <b>[5-6]‡</b>     | 22.7                | 25.6                  |
| <b>6</b>          | -2.6                | 0.1                   |
| <b>7</b>          | 3.9                 | 6.2                   |
| <b>8a</b>         | 8.5                 | 12.6                  |
| <b>[8a-9a]‡</b>   | 8.6                 | 12.4                  |
| <b>9a</b>         | -5.2                | -2.4                  |
| <b>10a</b>        | -2.9                | 0.1                   |
| <b>[10a-11a]‡</b> | 10.8                | 13.9                  |
| <b>11a</b>        | 11.0                | 14.4                  |
| <b>12</b>         | -2.9                | -0.6                  |
| <b>[12-13]‡</b>   | 5.7                 | 7.9                   |
| <b>13</b>         | 0.3                 | 2.8                   |
| <b>14</b>         | 4.8                 | 6.7                   |
| <b>[14-15]‡</b>   | 31.1                | 33.0                  |
| <b>15</b>         | 4.4                 | 7.0                   |

The single point calculation at the level of theory M06/SDD(Ni),6-311++G\*\* and (ii) M06/LANL2DZ (Ni),6-311++G\*\* with the SMD solvation model, obtained the most of transition states have the higher relative free energy then compare to the optimization at SMD(hexane)/B3LYP-D3/SDD(Ni),6-31G\*\* level of theory.

**Table S4.** Gibbs Free Energies of Various Species (in hartree) Involved in the Computation of the Overall Free Energy Change of the Reaction Obtained at the SMD(hexane)/B3LYPD3/SDD(Ni),6-31G\*\* Level of Theory

| Species                  | Gibbs free energy |
|--------------------------|-------------------|
| R1(Styrene)              | -309.570076       |
| R2(tosylamine)           | -1226.625072      |
| Alkene                   | -78.565223        |
| 1,5-Cyclooctadiene (COD) | -311.913603       |
| PCy <sub>3</sub>         | -1046.843131      |
| P1(Product)              | -1457.629202      |

### Optimized Cartesian Coordinates of Various Reactants, Products, Intermediates and Transition States

The Optimized Coordinates of all the Stationary Points obtained at the SMD(hexane)/B3LYPD3/



6-31G\*\* Level of Theory

-----  
**Ni (COD)<sub>2</sub>**  
 -----

Number of imaginary frequencies : 0  
 The smallest frequencies are : 80.2690 100.7381 114.4623 cm(-1)

Electronic energy : HF=-795.1503473  
 Zero-point correction= 0.364853  
 (Hartree/Particle)  
 Thermal correction to Energy= 0.381205  
 Thermal correction to Enthalpy= 0.382149  
 Thermal correction to Gibbs Free Energy= 0.323461  
 Sum of electronic and zero-point Energies= -794.785494  
 Sum of electronic and thermal Energies= -794.769142  
 Sum of electronic and thermal Enthalpies= -794.768198  
 Sum of electronic and thermal Free Energies= -794.826886

.....  
 Cartesian Coordinates  
 .....

|   |           |           |           |
|---|-----------|-----------|-----------|
| 6 | -2.609679 | -0.584859 | 1.419489  |
| 6 | -2.210865 | -1.837537 | 0.606821  |
| 1 | -2.863509 | -0.891974 | 2.440254  |
| 1 | -1.626262 | -2.500999 | 1.255455  |
| 1 | -3.111021 | -2.406151 | 0.324133  |
| 6 | -2.211543 | 1.837157  | -0.606283 |
| 1 | -1.626899 | 2.500745  | -1.254727 |
| 1 | -3.111892 | 2.405547  | -0.323780 |
| 6 | -2.609695 | 0.584341  | -1.419009 |
| 1 | -3.520862 | 0.139367  | -1.009063 |
| 1 | -2.863748 | 0.891472  | -2.439720 |
| 6 | -1.359571 | 1.532748  | 0.609393  |
| 1 | -0.752809 | 2.367488  | 0.956491  |
| 6 | -1.504346 | 0.462845  | 1.476483  |
| 1 | -0.975886 | 0.530520  | 2.423998  |
| 6 | -1.503672 | -0.462750 | -1.476024 |
| 1 | -0.976438 | -0.531192 | -2.424198 |
| 6 | -1.358565 | -1.532790 | -0.608559 |
| 1 | -0.752749 | -2.368011 | -0.956291 |
| 1 | -3.521057 | -0.140376 | 1.009496  |
| 6 | 2.609219  | 0.584680  | 1.419798  |
| 6 | 2.210367  | 1.837573  | 0.607462  |
| 1 | 2.862973  | 0.891537  | 2.440662  |
| 1 | 1.625547  | 2.500770  | 1.256171  |
| 1 | 3.110517  | 2.406402  | 0.325168  |
| 6 | 2.211995  | -1.836779 | -0.606529 |
| 1 | 1.627638  | -2.500266 | -1.255343 |
| 1 | 3.112412  | -2.405073 | -0.324044 |
| 6 | 2.610111  | -0.583593 | -1.418702 |
| 1 | 3.521010  | -0.138499 | -1.008261 |
| 1 | 2.864621  | -0.890332 | -2.439418 |
| 6 | 1.359611  | -1.532943 | 0.609010  |

|    |          |           |           |
|----|----------|-----------|-----------|
| 1  | 0.753157 | -2.368039 | 0.955811  |
| 6  | 1.503989 | -0.463117 | 1.476357  |
| 1  | 0.975120 | -0.531074 | 2.423621  |
| 6  | 1.503858 | 0.463269  | -1.475812 |
| 1  | 0.976769 | 0.531759  | -2.424062 |
| 6  | 1.358432 | 1.533102  | -0.608216 |
| 1  | 0.752327 | 2.368179  | -0.955744 |
| 1  | 3.520658 | 0.140396  | 1.009703  |
| 28 | 0.000090 | -0.000367 | -0.001442 |

-----  
**C1**  
-----

Number of imaginary frequencies : 0  
The smallest frequencies are : 18.0690 18.9994 29.5530 cm(-1)

Electronic energy : HF=-2265.5754782  
Zero-point correction= 0.973830  
(Hartree/Particle)  
Thermal correction to Energy= 1.015544  
Thermal correction to Enthalpy= 1.016488  
Thermal correction to Gibbs Free Energy= 0.899245  
Sum of electronic and zero-point Energies= -2264.601648  
Sum of electronic and thermal Energies= -2264.559934  
Sum of electronic and thermal Enthalpies= -2264.558990  
Sum of electronic and thermal Free Energies= -2264.676234

.....  
Cartesian Coordinates  
.....

|    |           |           |           |
|----|-----------|-----------|-----------|
| 28 | -0.000012 | -0.258778 | -0.000518 |
| 15 | 2.126491  | -0.138749 | -0.139418 |
| 6  | 2.827270  | -1.210295 | -1.515289 |
| 6  | 4.349839  | -1.191054 | -1.735336 |
| 6  | 2.313264  | -2.657838 | -1.371169 |
| 1  | 2.345483  | -0.795001 | -2.411019 |
| 6  | 4.744995  | -2.044738 | -2.953005 |
| 1  | 4.851192  | -1.593619 | -0.845317 |
| 1  | 4.711488  | -0.164252 | -1.865375 |
| 6  | 2.712991  | -3.514217 | -2.582789 |
| 1  | 2.731575  | -3.110687 | -0.460755 |
| 1  | 1.223760  | -2.643453 | -1.242119 |
| 6  | 4.230672  | -3.485324 | -2.817057 |
| 1  | 5.834765  | -2.038097 | -3.079450 |
| 1  | 4.320013  | -1.592925 | -3.860732 |
| 1  | 2.367963  | -4.546245 | -2.444616 |
| 1  | 2.201854  | -3.128654 | -3.476616 |
| 1  | 4.491654  | -4.069230 | -3.708223 |
| 1  | 4.734636  | -3.967002 | -1.966415 |
| 6  | 3.124085  | -0.650550 | 1.384183  |
| 6  | 4.484534  | 0.040802  | 1.605761  |
| 6  | 2.257307  | -0.552590 | 2.658821  |
| 1  | 3.319204  | -1.718940 | 1.210735  |
| 6  | 5.214286  | -0.548829 | 2.825194  |
| 1  | 4.327681  | 1.112876  | 1.779081  |
| 1  | 5.117677  | -0.041188 | 0.717397  |
| 6  | 2.986670  | -1.128997 | 3.882105  |
| 1  | 2.005231  | 0.500026  | 2.847581  |
| 1  | 1.302744  | -1.065388 | 2.491293  |

|    |           |           |           |
|----|-----------|-----------|-----------|
| 6  | 4.351798  | -0.458081 | 4.092095  |
| 1  | 6.169824  | -0.030954 | 2.975174  |
| 1  | 5.455787  | -1.602927 | 2.625912  |
| 1  | 2.363884  | -1.017526 | 4.778171  |
| 1  | 3.135193  | -2.208681 | 3.734757  |
| 1  | 4.874707  | -0.910760 | 4.943398  |
| 1  | 4.196874  | 0.600802  | 4.345036  |
| 6  | 2.716602  | 1.595780  | -0.561121 |
| 6  | 2.253061  | 1.989482  | -1.979525 |
| 6  | 2.150989  | 2.590575  | 0.476884  |
| 1  | 3.813311  | 1.631748  | -0.528497 |
| 6  | 2.596967  | 3.449709  | -2.313003 |
| 1  | 1.165688  | 1.838559  | -2.044638 |
| 1  | 2.706539  | 1.331120  | -2.728711 |
| 6  | 2.500257  | 4.047060  | 0.138194  |
| 1  | 1.059348  | 2.469586  | 0.504371  |
| 1  | 2.509643  | 2.345264  | 1.482384  |
| 6  | 2.023160  | 4.419456  | -1.271798 |
| 1  | 2.226284  | 3.698456  | -3.315103 |
| 1  | 3.690299  | 3.563479  | -2.345421 |
| 1  | 2.055933  | 4.718590  | 0.883492  |
| 1  | 3.589372  | 4.185795  | 0.200376  |
| 1  | 2.304551  | 5.451812  | -1.513173 |
| 1  | 0.925070  | 4.374638  | -1.304215 |
| 15 | -2.126462 | -0.138769 | 0.139134  |
| 6  | -2.826538 | -1.209774 | 1.515768  |
| 6  | -4.348976 | -1.190272 | 1.736596  |
| 6  | -2.312760 | -2.657428 | 1.371976  |
| 1  | -2.344217 | -0.794146 | 2.411056  |
| 6  | -4.743590 | -2.043397 | 2.954831  |
| 1  | -4.850843 | -1.593130 | 0.846990  |
| 1  | -4.710437 | -0.163372 | 1.866410  |
| 6  | -2.711940 | -3.513255 | 2.584164  |
| 1  | -2.731594 | -3.110635 | 0.461981  |
| 1  | -1.223324 | -2.643203 | 1.242340  |
| 6  | -4.229500 | -3.484095 | 2.819238  |
| 1  | -5.833294 | -2.036570 | 3.081843  |
| 1  | -4.318079 | -1.591241 | 3.862143  |
| 1  | -2.367100 | -4.545378 | 2.446237  |
| 1  | -2.200293 | -3.127376 | 3.477563  |
| 1  | -4.490068 | -4.067584 | 3.710796  |
| 1  | -4.733971 | -3.966098 | 1.969080  |
| 6  | -3.124466 | -0.651455 | -1.383927 |
| 6  | -4.485044 | 0.039624  | -1.605527 |
| 6  | -2.258007 | -0.554118 | -2.658831 |
| 1  | -3.319426 | -1.719772 | -1.209860 |
| 6  | -5.215038 | -0.550677 | -2.824496 |
| 1  | -4.328372 | 1.111631  | -1.779439 |
| 1  | -5.117943 | -0.042011 | -0.716953 |
| 6  | -2.987620 | -1.131199 | -3.881639 |
| 1  | -2.006001 | 0.498406  | -2.848213 |
| 1  | -1.303382 | -1.066797 | -2.491268 |
| 6  | -4.352847 | -0.460491 | -4.091644 |
| 1  | -6.170647 | -0.032944 | -2.974507 |
| 1  | -5.456422 | -1.604690 | -2.624633 |
| 1  | -2.365059 | -1.020136 | -4.777912 |
| 1  | -3.136025 | -2.210821 | -3.733710 |

|   |           |           |           |
|---|-----------|-----------|-----------|
| 1 | -4.875924 | -0.913626 | -4.942601 |
| 1 | -4.198057 | 0.598278  | -4.345140 |
| 6 | -2.716781 | 1.595818  | 0.560371  |
| 6 | -2.253144 | 1.990016  | 1.978589  |
| 6 | -2.151446 | 2.590296  | -0.478104 |
| 1 | -3.813496 | 1.631607  | 0.527892  |
| 6 | -2.597055 | 3.450352  | 2.311600  |
| 1 | -1.165762 | 1.839160  | 2.043708  |
| 1 | -2.706565 | 1.331891  | 2.728027  |
| 6 | -2.500642 | 4.046884  | -0.139814 |
| 1 | -1.059813 | 2.469279  | -0.505878 |
| 1 | -2.510416 | 2.344654  | -1.483409 |
| 6 | -2.023357 | 4.419734  | 1.269995  |
| 1 | -2.226271 | 3.699463  | 3.313568  |
| 1 | -3.690388 | 3.564116  | 2.344091  |
| 1 | -2.056382 | 4.718162  | -0.885378 |
| 1 | -3.589759 | 4.185632  | -0.201895 |
| 1 | -2.304727 | 5.452172  | 1.511050  |
| 1 | -0.925265 | 4.374937  | 1.302308  |

-----  
**C2**  
 -----

Number of imaginary frequencies : 0  
 The smallest frequencies are : 33.1014 37.4770 44.1851 cm(-1)

Electronic energy : HF=-1530.3499779  
 Zero-point correction= 0.666799  
 (Hartree/Particle)  
 Thermal correction to Energy= 0.696553  
 Thermal correction to Enthalpy= 0.697497  
 Thermal correction to Gibbs Free Energy= 0.607124  
 Sum of electronic and zero-point Energies= -1529.683179  
 Sum of electronic and thermal Energies= -1529.653425  
 Sum of electronic and thermal Enthalpies= -1529.652481  
 Sum of electronic and thermal Free Energies= -1529.742853

.....  
 Cartesian Coordinates  
 .....

|    |           |          |           |
|----|-----------|----------|-----------|
| 28 | 1.527850  | 0.418333 | 0.344701  |
| 15 | -0.571828 | 0.010001 | -0.084995 |
| 6  | -1.353464 | 1.487340 | -0.948012 |
| 6  | -2.848483 | 1.415661 | -1.304583 |
| 6  | -1.042934 | 2.779251 | -0.162763 |
| 1  | -0.781273 | 1.545801 | -1.884360 |
| 6  | -3.285966 | 2.660903 | -2.095828 |
| 1  | -3.441459 | 1.356734 | -0.382710 |
| 1  | -3.067205 | 0.509013 | -1.880982 |
| 6  | -1.486072 | 4.026881 | -0.942951 |
| 1  | -1.564730 | 2.759765 | 0.804678  |
| 1  | 0.031393  | 2.825617 | 0.058425  |
| 6  | -2.971849 | 3.952086 | -1.325644 |
| 1  | -4.357055 | 2.604395 | -2.325972 |
| 1  | -2.756947 | 2.676221 | -3.059504 |
| 1  | -1.288979 | 4.930208 | -0.352768 |
| 1  | -0.880504 | 4.109123 | -1.856857 |
| 1  | -3.257782 | 4.829051 | -1.918887 |
| 1  | -3.580154 | 3.980028 | -0.410096 |

|   |           |           |           |
|---|-----------|-----------|-----------|
| 6 | -1.746134 | -0.277252 | 1.382552  |
| 6 | -2.990052 | -1.157475 | 1.145859  |
| 6 | -0.966870 | -0.779052 | 2.615394  |
| 1 | -2.102050 | 0.735662  | 1.622373  |
| 6 | -3.887456 | -1.198171 | 2.395017  |
| 1 | -2.675468 | -2.182300 | 0.909076  |
| 1 | -3.566796 | -0.802240 | 0.286477  |
| 6 | -1.857901 | -0.833551 | 3.865234  |
| 1 | -0.565346 | -1.781620 | 2.410040  |
| 1 | -0.096490 | -0.135615 | 2.783932  |
| 6 | -3.112629 | -1.686205 | 3.627151  |
| 1 | -4.756590 | -1.841978 | 2.210245  |
| 1 | -4.279477 | -0.189260 | 2.588960  |
| 1 | -1.287625 | -1.222228 | 4.717930  |
| 1 | -2.162969 | 0.189140  | 4.131223  |
| 1 | -3.758298 | -1.675518 | 4.513647  |
| 1 | -2.811828 | -2.732067 | 3.469597  |
| 6 | -0.918280 | -1.432429 | -1.238165 |
| 6 | -0.437924 | -1.152346 | -2.676557 |
| 6 | -0.228512 | -2.696811 | -0.682760 |
| 1 | -2.000003 | -1.611196 | -1.273230 |
| 6 | -0.643167 | -2.372859 | -3.588798 |
| 1 | 0.627954  | -0.890799 | -2.654133 |
| 1 | -0.965449 | -0.289975 | -3.098127 |
| 6 | -0.435747 | -3.914091 | -1.595691 |
| 1 | 0.845367  | -2.488436 | -0.584616 |
| 1 | -0.590829 | -2.919888 | 0.327045  |
| 6 | 0.042793  | -3.624388 | -3.024908 |
| 1 | -0.267424 | -2.150682 | -4.595092 |
| 1 | -1.720233 | -2.567945 | -3.692304 |
| 1 | 0.090273  | -4.783954 | -1.183440 |
| 1 | -1.504190 | -4.173167 | -1.617433 |
| 1 | -0.143504 | -4.487958 | -3.674678 |
| 1 | 1.130728  | -3.465398 | -3.014821 |
| 6 | 4.064596  | -0.618388 | -0.652300 |
| 6 | 3.588377  | -1.494370 | 0.549851  |
| 1 | 4.320823  | -1.291035 | -1.478555 |
| 1 | 3.010420  | -2.339397 | 0.158105  |
| 1 | 4.474309  | -1.933707 | 1.034314  |
| 6 | 3.704375  | 2.362292  | 0.412749  |
| 1 | 3.113914  | 3.212946  | 0.775816  |
| 1 | 4.635585  | 2.792392  | 0.010266  |
| 6 | 4.034467  | 1.442950  | 1.619031  |
| 1 | 4.932893  | 0.855797  | 1.410042  |
| 1 | 4.284622  | 2.074982  | 2.479472  |
| 6 | 2.895679  | 1.687621  | -0.676450 |
| 1 | 2.278204  | 2.360839  | -1.273317 |
| 6 | 3.034417  | 0.390314  | -1.135250 |
| 1 | 2.519195  | 0.134405  | -2.059677 |
| 6 | 2.878905  | 0.527121  | 1.983299  |
| 1 | 2.257326  | 0.862693  | 2.815766  |
| 6 | 2.710839  | -0.782064 | 1.561360  |
| 1 | 2.037580  | -1.427238 | 2.124426  |
| 1 | 4.991632  | -0.102355 | -0.388048 |

-----  
**C3**  
-----

Number of imaginary frequencies : 0  
The smallest frequencies are : 19.4733 21.9885 32.2841 cm(-1)

Electronic energy : HF=-1842.4254601  
Zero-point correction= 0.853133  
(Hartree/Particle)  
Thermal correction to Energy= 0.891129  
Thermal correction to Enthalpy= 0.892073  
Thermal correction to Gibbs Free Energy= 0.783847  
Sum of electronic and zero-point Energies= -1841.572327  
Sum of electronic and thermal Energies= -1841.534331  
Sum of electronic and thermal Enthalpies= -1841.533387  
Sum of electronic and thermal Free Energies= -1841.641613

.....  
Cartesian Coordinates  
.....

|    |           |           |           |
|----|-----------|-----------|-----------|
| 28 | -0.818749 | 0.532489  | -0.760077 |
| 15 | 1.213099  | -0.364182 | -0.117371 |
| 6  | 1.723555  | -1.864394 | -1.174230 |
| 6  | 2.846231  | -2.765105 | -0.625849 |
| 6  | 0.520463  | -2.713206 | -1.612721 |
| 1  | 2.098288  | -1.385310 | -2.087537 |
| 6  | 3.249812  | -3.853396 | -1.635161 |
| 1  | 2.494874  | -3.259217 | 0.288351  |
| 1  | 3.726986  | -2.174348 | -0.353854 |
| 6  | 0.918133  | -3.834518 | -2.587142 |
| 1  | 0.023696  | -3.148913 | -0.733514 |
| 1  | -0.200746 | -2.056384 | -2.101708 |
| 6  | 2.043551  | -4.713822 | -2.030060 |
| 1  | 4.045792  | -4.476561 | -1.209360 |
| 1  | 3.667863  | -3.378344 | -2.534261 |
| 1  | 0.037264  | -4.441195 | -2.830630 |
| 1  | 1.255330  | -3.378885 | -3.529235 |
| 1  | 2.335406  | -5.474944 | -2.763745 |
| 1  | 1.679501  | -5.252629 | -1.143278 |
| 6  | 1.139700  | -1.018618 | 1.663961  |
| 6  | 2.439739  | -1.371826 | 2.420610  |
| 6  | 0.304157  | -0.074521 | 2.558473  |
| 1  | 0.565183  | -1.950643 | 1.546026  |
| 6  | 2.111731  | -2.053248 | 3.762949  |
| 1  | 3.008011  | -0.453916 | 2.617142  |
| 1  | 3.093499  | -2.021145 | 1.838172  |
| 6  | -0.060473 | -0.748555 | 3.887902  |
| 1  | 0.891022  | 0.827171  | 2.773515  |
| 1  | -0.584584 | 0.267909  | 2.027602  |
| 6  | 1.202971  | -1.185142 | 4.644980  |
| 1  | 3.040837  | -2.291503 | 4.295422  |
| 1  | 1.612474  | -3.011904 | 3.560440  |
| 1  | -0.659045 | -0.067573 | 4.505687  |
| 1  | -0.690561 | -1.627025 | 3.685994  |
| 1  | 0.937426  | -1.722511 | 5.563361  |
| 1  | 1.757803  | -0.288086 | 4.954900  |
| 6  | 2.869207  | 0.560765  | -0.133938 |
| 6  | 3.338858  | 0.928234  | -1.558832 |
| 6  | 2.852562  | 1.805528  | 0.773789  |
| 1  | 3.608655  | -0.135980 | 0.282234  |

|   |           |           |           |
|---|-----------|-----------|-----------|
| 6 | 4.674634  | 1.690694  | -1.545917 |
| 1 | 2.571951  | 1.535340  | -2.053673 |
| 1 | 3.460755  | 0.027999  | -2.168723 |
| 6 | 4.201488  | 2.540350  | 0.778520  |
| 1 | 2.079296  | 2.490921  | 0.426114  |
| 1 | 2.585003  | 1.527694  | 1.796736  |
| 6 | 4.623559  | 2.929102  | -0.643380 |
| 1 | 4.947241  | 1.971726  | -2.570498 |
| 1 | 5.465762  | 1.017752  | -1.184389 |
| 1 | 4.134700  | 3.429295  | 1.417694  |
| 1 | 4.970827  | 1.890913  | 1.220803  |
| 1 | 5.596674  | 3.434730  | -0.632897 |
| 1 | 3.898461  | 3.647092  | -1.052338 |
| 6 | 0.345825  | 3.344597  | -1.499124 |
| 6 | 0.089713  | 4.064719  | -0.143430 |
| 1 | 1.386646  | 3.011016  | -1.509471 |
| 1 | 1.035987  | 4.510183  | 0.186274  |
| 1 | -0.584929 | 4.909056  | -0.320137 |
| 6 | -3.030619 | 2.642973  | -1.171496 |
| 1 | -3.794867 | 1.903843  | -0.911057 |
| 1 | -3.508818 | 3.282364  | -1.931253 |
| 6 | -2.795621 | 3.515779  | 0.085711  |
| 1 | -2.474555 | 4.513134  | -0.233291 |
| 1 | -3.764141 | 3.655744  | 0.580951  |
| 6 | -1.882217 | 1.876375  | -1.824008 |
| 1 | -2.276510 | 1.300777  | -2.666019 |
| 6 | -0.491247 | 2.144189  | -1.929305 |
| 1 | -0.042969 | 1.715539  | -2.832893 |
| 6 | -1.793800 | 2.959839  | 1.059320  |
| 1 | -2.155755 | 2.318513  | 1.858473  |
| 6 | -0.481428 | 3.206204  | 0.953459  |
| 1 | 0.203583  | 2.759647  | 1.667502  |
| 1 | 0.286902  | 4.111842  | -2.288041 |
| 6 | -5.623914 | -1.107267 | 1.025148  |
| 6 | -4.323143 | -1.314128 | 1.769803  |
| 6 | -3.770161 | -0.777338 | -1.666498 |
| 6 | -3.189524 | -0.313218 | 1.369335  |
| 6 | -2.469387 | -1.071343 | -0.957213 |
| 6 | -2.217622 | -0.922096 | 0.383821  |
| 1 | -3.956631 | -2.337964 | 1.612671  |
| 1 | -3.637131 | 0.594943  | 0.957502  |
| 1 | -4.155330 | 0.212211  | -1.423553 |
| 1 | -6.447500 | -0.707857 | 1.616683  |
| 1 | -4.518526 | -1.221677 | 2.843574  |
| 1 | -3.590108 | -0.789294 | -2.746930 |
| 1 | -2.648022 | -0.014200 | 2.272062  |
| 1 | -1.851857 | -1.782505 | -1.491954 |
| 1 | -1.457623 | -1.561382 | 0.825261  |
| 6 | -5.855877 | -1.332339 | -0.273965 |
| 1 | -6.851361 | -1.098874 | -0.651124 |
| 6 | -4.866470 | -1.832676 | -1.303283 |
| 1 | -4.376121 | -2.748470 | -0.946266 |
| 1 | -5.413808 | -2.110653 | -2.210169 |

---

**C4**

---

Number of imaginary frequencies : 0

The smallest frequencies are : 12.1514 30.5775 35.8390 cm(-1)

Electronic energy : HF=-2577.661602  
Zero-point correction= 1.158117  
(Hartree/Particle)  
Thermal correction to Energy= 1.207852  
Thermal correction to Enthalpy= 1.208796  
Thermal correction to Gibbs Free Energy= 1.077104  
Sum of electronic and zero-point Energies= -2576.503485  
Sum of electronic and thermal Energies= -2576.453750  
Sum of electronic and thermal Enthalpies= -2576.452806  
Sum of electronic and thermal Free Energies= -2576.584498

.....  
Cartesian Coordinates  
.....

|    |           |           |           |
|----|-----------|-----------|-----------|
| 28 | 0.027870  | -0.859891 | -0.534015 |
| 15 | 1.795929  | 0.486055  | 0.108448  |
| 6  | 2.581247  | -0.383585 | 1.595653  |
| 6  | 3.692780  | 0.249173  | 2.458268  |
| 6  | 1.505063  | -0.971712 | 2.533288  |
| 1  | 3.042374  | -1.232524 | 1.082323  |
| 6  | 4.335916  | -0.828331 | 3.350915  |
| 1  | 3.261821  | 1.017199  | 3.110227  |
| 1  | 4.455285  | 0.742644  | 1.848322  |
| 6  | 2.105688  | -2.039064 | 3.461150  |
| 1  | 1.073745  | -0.163792 | 3.139791  |
| 1  | 0.681674  | -1.396821 | 1.948698  |
| 6  | 3.292278  | -1.487134 | 4.265464  |
| 1  | 5.140165  | -0.385507 | 3.951228  |
| 1  | 4.802653  | -1.593600 | 2.714466  |
| 1  | 1.333201  | -2.424137 | 4.138371  |
| 1  | 2.438758  | -2.890064 | 2.851349  |
| 1  | 3.754108  | -2.283842 | 4.860987  |
| 1  | 2.923165  | -0.735621 | 4.978690  |
| 6  | 1.488036  | 2.296624  | 0.601981  |
| 6  | 2.619646  | 3.119655  | 1.254392  |
| 6  | 0.961017  | 3.070664  | -0.624905 |
| 1  | 0.676643  | 2.225165  | 1.331389  |
| 6  | 2.145573  | 4.539850  | 1.619055  |
| 1  | 3.471369  | 3.196399  | 0.565927  |
| 1  | 2.988464  | 2.636890  | 2.156896  |
| 6  | 0.460677  | 4.474524  | -0.256871 |
| 1  | 1.773190  | 3.178399  | -1.355432 |
| 1  | 0.175457  | 2.498863  | -1.117921 |
| 6  | 1.571327  | 5.292816  | 0.413230  |
| 1  | 2.978648  | 5.102001  | 2.059121  |
| 1  | 1.374001  | 4.467612  | 2.398997  |
| 1  | 0.089677  | 4.986527  | -1.153368 |
| 1  | -0.390208 | 4.389366  | 0.432523  |
| 1  | 1.196081  | 6.276871  | 0.719543  |
| 1  | 2.373664  | 5.474405  | -0.316245 |
| 6  | 3.238175  | 0.758966  | -1.106722 |
| 6  | 4.439698  | -0.199920 | -0.985902 |
| 6  | 2.716944  | 0.758949  | -2.560677 |
| 1  | 3.620113  | 1.765352  | -0.893613 |
| 6  | 5.546046  | 0.163934  | -1.992039 |
| 1  | 4.114165  | -1.227715 | -1.169713 |



|    |           |           |           |
|----|-----------|-----------|-----------|
| 1  | 4.858852  | -0.179300 | 0.023187  |
| 6  | 3.820320  | 1.141221  | -3.557976 |
| 1  | 2.344782  | -0.240766 | -2.798423 |
| 1  | 1.860322  | 1.431167  | -2.668314 |
| 6  | 5.023586  | 0.197184  | -3.434363 |
| 1  | 6.375153  | -0.548866 | -1.901438 |
| 1  | 5.953039  | 1.152385  | -1.733947 |
| 1  | 3.422518  | 1.122631  | -4.580132 |
| 1  | 4.146486  | 2.174223  | -3.366172 |
| 1  | 5.822845  | 0.496404  | -4.123396 |
| 1  | 4.714356  | -0.815722 | -3.729357 |
| 15 | -1.998693 | 0.095326  | -0.082300 |
| 6  | -2.074348 | 1.654036  | 0.993951  |
| 6  | -3.416286 | 2.408382  | 1.067307  |
| 6  | -1.564076 | 1.357985  | 2.419370  |
| 1  | -1.349551 | 2.324136  | 0.522870  |
| 6  | -3.289506 | 3.698422  | 1.896049  |
| 1  | -4.173937 | 1.767813  | 1.535234  |
| 1  | -3.782953 | 2.654247  | 0.065486  |
| 6  | -1.439768 | 2.640138  | 3.258044  |
| 1  | -2.258167 | 0.676829  | 2.929990  |
| 1  | -0.606105 | 0.834650  | 2.370439  |
| 6  | -2.766850 | 3.408932  | 3.309619  |
| 1  | -4.260201 | 4.207131  | 1.944332  |
| 1  | -2.600010 | 4.387551  | 1.388152  |
| 1  | -1.099538 | 2.392348  | 4.271101  |
| 1  | -0.669235 | 3.287692  | 2.817921  |
| 1  | -2.646463 | 4.342468  | 3.872426  |
| 1  | -3.511063 | 2.807637  | 3.851409  |
| 6  | -3.426219 | -0.882084 | 0.728774  |
| 6  | -4.856409 | -0.656160 | 0.191475  |
| 6  | -3.135158 | -2.386558 | 0.789977  |
| 1  | -3.414920 | -0.515598 | 1.763725  |
| 6  | -5.892225 | -1.389880 | 1.062470  |
| 1  | -4.929540 | -1.034365 | -0.835961 |
| 1  | -5.107566 | 0.406900  | 0.151543  |
| 6  | -4.158673 | -3.132983 | 1.656967  |
| 1  | -3.161843 | -2.789938 | -0.228167 |
| 1  | -2.120485 | -2.553790 | 1.158733  |
| 6  | -5.590734 | -2.891383 | 1.161421  |
| 1  | -6.898801 | -1.227733 | 0.657276  |
| 1  | -5.886529 | -0.951270 | 2.071060  |
| 1  | -3.932300 | -4.206513 | 1.664281  |
| 1  | -4.071086 | -2.786585 | 2.697199  |
| 1  | -6.316232 | -3.384774 | 1.819654  |
| 1  | -5.707100 | -3.346628 | 0.167251  |
| 6  | -2.775448 | 0.710434  | -1.697478 |
| 6  | -2.050437 | 1.926629  | -2.302766 |
| 6  | -2.860031 | -0.402810 | -2.759235 |
| 1  | -3.797979 | 1.024574  | -1.459910 |
| 6  | -2.759907 | 2.426305  | -3.572747 |
| 1  | -1.021435 | 1.637449  | -2.552933 |
| 1  | -1.987549 | 2.747241  | -1.581269 |
| 6  | -3.590899 | 0.080785  | -4.021814 |
| 1  | -1.840290 | -0.702670 | -3.027884 |
| 1  | -3.350759 | -1.295236 | -2.356111 |
| 6  | -2.899516 | 1.313387  | -4.619484 |

|   |           |           |           |
|---|-----------|-----------|-----------|
| 1 | -2.213119 | 3.280392  | -3.991225 |
| 1 | -3.759312 | 2.795543  | -3.300963 |
| 1 | -3.634186 | -0.728813 | -4.760564 |
| 1 | -4.630805 | 0.332336  | -3.767544 |
| 1 | -3.449907 | 1.678103  | -5.495140 |
| 1 | -1.899096 | 1.024795  | -4.972269 |
| 6 | 2.628127  | -3.431161 | -0.363642 |
| 6 | 2.095288  | -3.005084 | -1.763894 |
| 1 | 2.212944  | -2.727391 | 0.359313  |
| 1 | 2.880332  | -2.428421 | -2.264475 |
| 1 | 1.964088  | -3.910958 | -2.376385 |
| 6 | -0.077678 | -4.256191 | 0.628346  |
| 1 | 0.222388  | -3.290579 | 1.052458  |
| 1 | -0.831218 | -4.673022 | 1.305096  |
| 6 | -0.716559 | -3.992711 | -0.769793 |
| 1 | -0.349908 | -4.770044 | -1.457316 |
| 1 | -1.793756 | -4.158678 | -0.699814 |
| 6 | 1.100945  | -5.191958 | 0.554366  |
| 1 | 0.933016  | -6.231049 | 0.836672  |
| 6 | 2.297456  | -4.832823 | 0.076327  |
| 1 | 3.079675  | -5.585773 | -0.016906 |
| 6 | -0.475937 | -2.634263 | -1.430216 |
| 1 | -1.290027 | -2.404531 | -2.114213 |
| 6 | 0.811129  | -2.176398 | -1.824924 |
| 1 | 0.796704  | -1.562598 | -2.734053 |
| 1 | 3.716557  | -3.303668 | -0.339381 |

-----  
**C5**  
 -----

Number of imaginary frequencies : 0  
 The smallest frequencies are : 14.3059 23.0985 29.7134 cm(-1)

Electronic energy : HF=-1530.3455085  
 Zero-point correction= 0.667536  
 (Hartree/Particle)  
 Thermal correction to Energy= 0.697565  
 Thermal correction to Enthalpy= 0.698510  
 Thermal correction to Gibbs Free Energy= 0.605141  
 Sum of electronic and zero-point Energies= -1529.677973  
 Sum of electronic and thermal Energies= -1529.647943  
 Sum of electronic and thermal Enthalpies= -1529.646999  
 Sum of electronic and thermal Free Energies= -1529.740368

.....  
 Cartesian Coordinates  
 .....

|    |           |           |           |
|----|-----------|-----------|-----------|
| 28 | -1.066789 | -0.161614 | -1.212551 |
| 15 | 0.776480  | 0.092595  | -0.089710 |
| 6  | 2.284668  | 0.307002  | -1.185859 |
| 6  | 3.641545  | 0.507990  | -0.488203 |
| 6  | 2.363003  | -0.839728 | -2.215342 |
| 1  | 2.048222  | 1.219601  | -1.749916 |
| 6  | 4.759251  | 0.760360  | -1.514646 |
| 1  | 3.889556  | -0.392148 | 0.089334  |
| 1  | 3.594685  | 1.339649  | 0.224822  |
| 6  | 3.484597  | -0.593778 | -3.236711 |
| 1  | 2.555595  | -1.790154 | -1.697418 |

|   |           |           |           |
|---|-----------|-----------|-----------|
| 1 | 1.392913  | -0.943592 | -2.717266 |
| 6 | 4.838596  | -0.375101 | -2.545463 |
| 1 | 5.720713  | 0.878947  | -1.000093 |
| 1 | 4.561143  | 1.708355  | -2.034799 |
| 1 | 3.544497  | -1.435316 | -3.937554 |
| 1 | 3.235178  | 0.295217  | -3.833382 |
| 1 | 5.616946  | -0.162103 | -3.287964 |
| 1 | 5.136216  | -1.302693 | -2.035156 |
| 6 | 1.252482  | -1.322461 | 1.068871  |
| 6 | 2.048840  | -0.945910 | 2.334791  |
| 6 | 0.013998  | -2.165584 | 1.440149  |
| 1 | 1.899658  | -1.956956 | 0.446431  |
| 6 | 2.444124  | -2.200072 | 3.132350  |
| 1 | 1.434298  | -0.303475 | 2.977242  |
| 1 | 2.941969  | -0.368531 | 2.079082  |
| 6 | 0.401547  | -3.410051 | 2.252766  |
| 1 | -0.684008 | -1.548897 | 2.021302  |
| 1 | -0.525576 | -2.446013 | 0.528334  |
| 6 | 1.212315  | -3.038045 | 3.502580  |
| 1 | 2.995351  | -1.909590 | 4.035127  |
| 1 | 3.129773  | -2.811030 | 2.527799  |
| 1 | -0.499119 | -3.970258 | 2.532438  |
| 1 | 1.003124  | -4.077933 | 1.619407  |
| 1 | 1.513384  | -3.941231 | 4.046865  |
| 1 | 0.575306  | -2.456580 | 4.184593  |
| 6 | 0.751994  | 1.634267  | 0.982274  |
| 6 | 0.722377  | 2.910233  | 0.115602  |
| 6 | -0.479302 | 1.596114  | 1.911948  |
| 1 | 1.661002  | 1.654327  | 1.597399  |
| 6 | 0.602563  | 4.179421  | 0.975044  |
| 1 | -0.131075 | 2.849007  | -0.574864 |
| 1 | 1.623632  | 2.975589  | -0.503364 |
| 6 | -0.588021 | 2.862599  | 2.773427  |
| 1 | -1.376352 | 1.494734  | 1.287966  |
| 1 | -0.453564 | 0.708313  | 2.552888  |
| 6 | -0.618961 | 4.125226  | 1.902242  |
| 1 | 0.552054  | 5.061652  | 0.325398  |
| 1 | 1.512171  | 4.289109  | 1.583248  |
| 1 | -1.485834 | 2.807720  | 3.401382  |
| 1 | 0.271351  | 2.913569  | 3.457632  |
| 1 | -0.663467 | 5.024136  | 2.528928  |
| 1 | -1.534298 | 4.119298  | 1.293303  |
| 6 | -3.544215 | 1.437505  | -1.203736 |
| 6 | -4.488755 | 0.814205  | -0.157532 |
| 1 | -2.856978 | 2.123576  | -0.686287 |
| 1 | -4.952907 | 1.638089  | 0.398829  |
| 1 | -5.302729 | 0.303104  | -0.683927 |
| 6 | -3.148140 | -2.112562 | -1.853867 |
| 1 | -2.303575 | -2.764207 | -1.577704 |
| 1 | -3.630762 | -2.617619 | -2.705047 |
| 6 | -4.158069 | -2.110752 | -0.690315 |
| 1 | -5.084981 | -1.637507 | -1.032977 |
| 1 | -4.410113 | -3.155970 | -0.471532 |
| 6 | -2.534454 | -0.814537 | -2.364056 |
| 1 | -2.029018 | -1.009937 | -3.317485 |
| 6 | -2.676514 | 0.563681  | -2.100949 |
| 1 | -2.257689 | 1.185355  | -2.900656 |

|   |           |           |           |
|---|-----------|-----------|-----------|
| 6 | -3.661326 | -1.437032 | 0.560056  |
| 1 | -3.115217 | -2.051981 | 1.273470  |
| 6 | -3.813684 | -0.129709 | 0.800442  |
| 1 | -3.393959 | 0.298570  | 1.708937  |
| 1 | -4.157380 | 2.082394  | -1.852870 |

-----  
**3**  
 -----

Number of imaginary frequencies : 0  
 The smallest frequencies are : 17.0780 20.5021 27.9226 cm(-1)

Electronic energy : HF=-3492.5575923  
 Zero-point correction= 1.346105  
 (Hartree/Particle)  
 Thermal correction to Energy= 1.408945  
 Thermal correction to Enthalpy= 1.409889  
 Thermal correction to Gibbs Free Energy= 1.247684  
 Sum of electronic and zero-point Energies= -3491.211487  
 Sum of electronic and thermal Energies= -3491.148648  
 Sum of electronic and thermal Enthalpies= -3491.147704  
 Sum of electronic and thermal Free Energies= -3491.309908

.....  
 Cartesian Coordinates  
 .....

|    |          |           |           |
|----|----------|-----------|-----------|
| 28 | 1.077467 | -0.391644 | -0.176568 |
| 15 | 2.290223 | 1.287441  | 0.407067  |
| 6  | 2.236484 | 2.767640  | -0.752052 |
| 6  | 3.078389 | 4.002525  | -0.382644 |
| 6  | 2.547312 | 2.334286  | -2.200263 |
| 1  | 1.177475 | 3.058768  | -0.725035 |
| 6  | 2.809690 | 5.158601  | -1.362321 |
| 1  | 4.143739 | 3.739920  | -0.424624 |
| 1  | 2.872044 | 4.326766  | 0.643368  |
| 6  | 2.269475 | 3.477403  | -3.187985 |
| 1  | 3.605513 | 2.048486  | -2.279761 |
| 1  | 1.968758 | 1.440967  | -2.458128 |
| 6  | 3.065640 | 4.738002  | -2.817426 |
| 1  | 3.431089 | 6.024698  | -1.102492 |
| 1  | 1.763838 | 5.478293  | -1.256124 |
| 1  | 2.511597 | 3.160878  | -4.210342 |
| 1  | 1.194899 | 3.706509  | -3.173983 |
| 1  | 2.819049 | 5.560556  | -3.499881 |
| 1  | 4.138311 | 4.533157  | -2.946894 |
| 6  | 4.143795 | 0.877159  | 0.462987  |
| 6  | 4.997510 | 1.637065  | 1.498349  |
| 6  | 4.389103 | -0.639685 | 0.592005  |
| 1  | 4.496409 | 1.173093  | -0.534957 |
| 6  | 6.489634 | 1.297991  | 1.339891  |
| 1  | 4.677670 | 1.358251  | 2.510752  |
| 1  | 4.854700 | 2.718274  | 1.412169  |
| 6  | 5.876296 | -0.986665 | 0.435585  |
| 1  | 4.035846 | -0.982980 | 1.573131  |
| 1  | 3.782299 | -1.169513 | -0.148543 |
| 6  | 6.740511 | -0.213501 | 1.442096  |
| 1  | 7.076093 | 1.834042  | 2.096420  |
| 1  | 6.837519 | 1.657118  | 0.360365  |

|    |           |           |           |
|----|-----------|-----------|-----------|
| 1  | 6.024715  | -2.067365 | 0.554151  |
| 1  | 6.197482  | -0.735409 | -0.586047 |
| 1  | 7.803694  | -0.435621 | 1.288354  |
| 1  | 6.492167  | -0.549669 | 2.459196  |
| 6  | 1.914226  | 2.010179  | 2.098830  |
| 6  | 0.618866  | 2.842032  | 2.078929  |
| 6  | 1.788500  | 0.852903  | 3.113816  |
| 1  | 2.739557  | 2.663695  | 2.406892  |
| 6  | 0.230718  | 3.335721  | 3.482207  |
| 1  | -0.186405 | 2.224548  | 1.673238  |
| 1  | 0.725955  | 3.703512  | 1.410818  |
| 6  | 1.431808  | 1.364072  | 4.517059  |
| 1  | 1.000840  | 0.174927  | 2.760525  |
| 1  | 2.715737  | 0.267753  | 3.147970  |
| 6  | 0.132649  | 2.180388  | 4.488584  |
| 1  | -0.724881 | 3.870261  | 3.426771  |
| 1  | 0.982925  | 4.059333  | 3.830594  |
| 1  | 1.335319  | 0.516613  | 5.207727  |
| 1  | 2.253421  | 1.988973  | 4.898472  |
| 1  | -0.099095 | 2.567725  | 5.488726  |
| 1  | -0.694035 | 1.523794  | 4.193466  |
| 15 | 0.603893  | -2.437596 | -0.604092 |
| 6  | 2.041932  | -3.166425 | -1.577956 |
| 6  | 1.982098  | -4.659848 | -1.943186 |
| 6  | 2.324896  | -2.309044 | -2.828300 |
| 1  | 2.891911  | -3.022329 | -0.898586 |
| 6  | 3.278465  | -5.107725 | -2.641838 |
| 1  | 1.137379  | -4.836696 | -2.621922 |
| 1  | 1.807308  | -5.272277 | -1.050760 |
| 6  | 3.612224  | -2.759208 | -3.535855 |
| 1  | 1.481693  | -2.388284 | -3.530181 |
| 1  | 2.389047  | -1.254178 | -2.533788 |
| 6  | 3.569432  | -4.254260 | -3.884571 |
| 1  | 3.211067  | -6.168341 | -2.914184 |
| 1  | 4.115951  | -5.017085 | -1.935308 |
| 1  | 3.774708  | -2.159971 | -4.440359 |
| 1  | 4.468456  | -2.566880 | -2.872935 |
| 1  | 4.512275  | -4.566785 | -4.349522 |
| 1  | 2.779019  | -4.426095 | -4.629573 |
| 6  | -0.912075 | -3.017164 | -1.588226 |
| 6  | -1.458212 | -4.426231 | -1.276593 |
| 6  | -2.040324 | -1.972053 | -1.497724 |
| 1  | -0.555147 | -3.021455 | -2.628871 |
| 6  | -2.641117 | -4.781172 | -2.193677 |
| 1  | -1.803094 | -4.464469 | -0.235908 |
| 1  | -0.673622 | -5.182059 | -1.371586 |
| 6  | -3.243390 | -2.332023 | -2.381249 |
| 1  | -2.373026 | -1.887055 | -0.456606 |
| 1  | -1.651463 | -0.992096 | -1.782863 |
| 6  | -3.766003 | -3.743056 | -2.079679 |
| 1  | -3.016461 | -5.782083 | -1.946439 |
| 1  | -2.291533 | -4.825162 | -3.235288 |
| 1  | -4.040962 | -1.591400 | -2.241362 |
| 1  | -2.942534 | -2.276304 | -3.437665 |
| 1  | -4.595239 | -3.998955 | -2.750883 |
| 1  | -4.167626 | -3.761942 | -1.057022 |
| 6  | 0.571987  | -3.455660 | 0.979016  |

|    |           |           |           |
|----|-----------|-----------|-----------|
| 6  | 1.912902  | -3.321962 | 1.729895  |
| 6  | -0.580982 | -2.950745 | 1.870919  |
| 1  | 0.405350  | -4.513969 | 0.739619  |
| 6  | 1.880240  | -4.018050 | 3.098959  |
| 1  | 2.121232  | -2.252300 | 1.864063  |
| 1  | 2.734427  | -3.730648 | 1.130753  |
| 6  | -0.612316 | -3.645297 | 3.239985  |
| 1  | -0.470774 | -1.867973 | 2.008742  |
| 1  | -1.539775 | -3.097842 | 1.362964  |
| 6  | 0.729052  | -3.496287 | 3.968779  |
| 1  | 2.841301  | -3.874290 | 3.608778  |
| 1  | 1.760829  | -5.101929 | 2.953953  |
| 1  | -1.424961 | -3.228079 | 3.847583  |
| 1  | -0.833320 | -4.714444 | 3.104452  |
| 1  | 0.705519  | -4.023703 | 4.930300  |
| 1  | 0.898658  | -2.434082 | 4.193287  |
| 7  | -2.090523 | 1.334467  | 0.144885  |
| 6  | -2.869440 | 1.904200  | -0.977446 |
| 6  | -3.309630 | 3.375353  | -0.673203 |
| 6  | -2.155976 | 4.322925  | -0.278258 |
| 6  | -4.205066 | 3.983737  | -1.779655 |
| 1  | -3.939314 | 3.284205  | 0.214842  |
| 6  | -1.429640 | 4.982189  | -1.459755 |
| 1  | -1.452770 | 3.781852  | 0.358332  |
| 1  | -2.586252 | 5.116729  | 0.347006  |
| 6  | -3.459692 | 4.687008  | -2.928972 |
| 1  | -4.884246 | 3.217409  | -2.178217 |
| 1  | -4.846942 | 4.732558  | -1.296922 |
| 6  | -2.419364 | 5.682998  | -2.399799 |
| 1  | -0.870138 | 4.226940  | -2.021984 |
| 1  | -0.694465 | 5.701240  | -1.076985 |
| 1  | -4.189630 | 5.199171  | -3.568257 |
| 1  | -2.951052 | 3.955504  | -3.566578 |
| 1  | -1.889459 | 6.156250  | -3.235459 |
| 1  | -2.930887 | 6.488937  | -1.852881 |
| 16 | -2.784512 | 1.000370  | 1.630148  |
| 8  | -1.778018 | 0.207271  | 2.348834  |
| 8  | -3.292874 | 2.255621  | 2.195771  |
| 6  | -4.202436 | -0.058120 | 1.328291  |
| 6  | -5.393023 | 0.488762  | 0.842603  |
| 6  | -4.084662 | -1.431256 | 1.550751  |
| 6  | -6.455140 | -0.360883 | 0.535160  |
| 1  | -5.495170 | 1.562162  | 0.726141  |
| 6  | -5.161401 | -2.263156 | 1.254313  |
| 1  | -3.165222 | -1.827965 | 1.962527  |
| 6  | -6.353284 | -1.746677 | 0.722831  |
| 1  | -7.379488 | 0.060489  | 0.149636  |
| 1  | -5.075025 | -3.331049 | 1.436367  |
| 6  | -2.123054 | 1.732211  | -2.277281 |
| 6  | -0.835732 | 1.431950  | -2.449865 |
| 1  | -2.756158 | 1.868256  | -3.150605 |
| 1  | -0.421391 | 1.319783  | -3.447535 |
| 1  | -0.148724 | 1.256916  | -1.624051 |
| 1  | -3.804511 | 1.332859  | -1.097863 |
| 1  | -1.441635 | 0.579315  | -0.093658 |
| 6  | -7.483574 | -2.668733 | 0.341157  |
| 1  | -7.292373 | -3.126885 | -0.637472 |

|   |           |           |          |
|---|-----------|-----------|----------|
| 1 | -7.597249 | -3.484477 | 1.062286 |
| 1 | -8.436377 | -2.135839 | 0.274720 |

-----  
**TS [3-4]**  
 -----

Number of imaginary frequencies : 1  
 The smallest frequencies are : -1041.7203 16.9155 23.1904 cm(-1)

Electronic energy : HF=-3492.5250306  
 Zero-point correction= 1.341270  
 (Hartree/Particle)  
 Thermal correction to Energy= 1.403700  
 Thermal correction to Enthalpy= 1.404645  
 Thermal correction to Gibbs Free Energy= 1.244608  
 Sum of electronic and zero-point Energies= -3491.183760  
 Sum of electronic and thermal Energies= -3491.121330  
 Sum of electronic and thermal Enthalpies= -3491.120386  
 Sum of electronic and thermal Free Energies= -3491.280423

.....  
 Cartesian Coordinates  
 .....

|    |          |           |           |
|----|----------|-----------|-----------|
| 28 | 0.317560 | -0.137885 | 0.053648  |
| 15 | 2.020745 | 1.310776  | 0.570492  |
| 6  | 2.097338 | 2.763244  | -0.638986 |
| 6  | 2.780938 | 4.086129  | -0.219166 |
| 6  | 2.637461 | 2.328042  | -2.018013 |
| 1  | 1.030107 | 2.982613  | -0.775914 |
| 6  | 2.503210 | 5.182513  | -1.261861 |
| 1  | 3.863186 | 3.948405  | -0.142981 |
| 1  | 2.446862 | 4.418730  | 0.765970  |
| 6  | 2.383376 | 3.413009  | -3.076500 |
| 1  | 3.716357 | 2.135916  | -1.949446 |
| 1  | 2.174521 | 1.390662  | -2.334944 |
| 6  | 2.984614 | 4.762619  | -2.657984 |
| 1  | 2.989338 | 6.117739  | -0.958023 |
| 1  | 1.424265 | 5.384069  | -1.292526 |
| 1  | 2.793902 | 3.096200  | -4.043523 |
| 1  | 1.299211 | 3.522582  | -3.213622 |
| 1  | 2.737092 | 5.534975  | -3.396324 |
| 1  | 4.081069 | 4.678064  | -2.646883 |
| 6  | 3.780241 | 0.622193  | 0.578120  |
| 6  | 4.965032 | 1.597836  | 0.716769  |
| 6  | 3.953685 | -0.524788 | 1.591443  |
| 1  | 3.837555 | 0.176009  | -0.424668 |
| 6  | 6.310446 | 0.868827  | 0.537051  |
| 1  | 4.932445 | 2.079780  | 1.703416  |
| 1  | 4.903336 | 2.393415  | -0.025999 |
| 6  | 5.272858 | -1.277411 | 1.371039  |
| 1  | 3.967592 | -0.110098 | 2.605889  |
| 1  | 3.100730 | -1.201563 | 1.544245  |
| 6  | 6.467004 | -0.321876 | 1.491820  |
| 1  | 7.135982 | 1.578536  | 0.670544  |
| 1  | 6.374606 | 0.507046  | -0.499643 |
| 1  | 5.361817 | -2.098234 | 2.093457  |
| 1  | 5.272242 | -1.734384 | 0.371843  |
| 1  | 7.407651 | -0.849606 | 1.292243  |

|    |           |           |           |
|----|-----------|-----------|-----------|
| 1  | 6.525643  | 0.048228  | 2.525318  |
| 6  | 1.729249  | 2.115902  | 2.247324  |
| 6  | 0.527560  | 3.086046  | 2.168509  |
| 6  | 1.427669  | 1.037152  | 3.315336  |
| 1  | 2.630606  | 2.675984  | 2.535639  |
| 6  | 0.183787  | 3.702285  | 3.532285  |
| 1  | -0.343982 | 2.539068  | 1.804975  |
| 1  | 0.707214  | 3.890218  | 1.451805  |
| 6  | 1.089060  | 1.653872  | 4.681790  |
| 1  | 0.574868  | 0.440694  | 2.970616  |
| 1  | 2.270570  | 0.353185  | 3.428934  |
| 6  | -0.096344 | 2.620656  | 4.580254  |
| 1  | -0.688072 | 4.357190  | 3.418783  |
| 1  | 1.018623  | 4.336058  | 3.868521  |
| 1  | 0.868683  | 0.851054  | 5.396407  |
| 1  | 1.968604  | 2.189764  | 5.070345  |
| 1  | -0.306842 | 3.075885  | 5.556265  |
| 1  | -0.992271 | 2.065501  | 4.277805  |
| 15 | 0.571492  | -2.192306 | -0.518853 |
| 6  | 2.310767  | -2.508122 | -1.195047 |
| 6  | 2.782461  | -3.950380 | -1.458080 |
| 6  | 2.578061  | -1.636348 | -2.437194 |
| 1  | 2.934763  | -2.103544 | -0.389744 |
| 6  | 4.277346  | -3.975609 | -1.823711 |
| 1  | 2.217007  | -4.375874 | -2.295179 |
| 1  | 2.601163  | -4.593100 | -0.589821 |
| 6  | 4.064208  | -1.656587 | -2.828313 |
| 1  | 1.985358  | -2.007708 | -3.284460 |
| 1  | 2.244104  | -0.612850 | -2.243553 |
| 6  | 4.569266  | -3.090650 | -3.044537 |
| 1  | 4.597611  | -5.006919 | -2.016156 |
| 1  | 4.863905  | -3.619983 | -0.965205 |
| 1  | 4.224122  | -1.053537 | -3.730653 |
| 1  | 4.652243  | -1.185436 | -2.028640 |
| 1  | 5.643210  | -3.087860 | -3.267000 |
| 1  | 4.067204  | -3.519167 | -3.923906 |
| 6  | -0.547783 | -2.894803 | -1.887748 |
| 6  | -0.641328 | -4.433657 | -1.992367 |
| 6  | -1.972945 | -2.309679 | -1.871287 |
| 1  | -0.066461 | -2.523303 | -2.803728 |
| 6  | -1.421103 | -4.856870 | -3.249818 |
| 1  | -1.162291 | -4.825183 | -1.109370 |
| 1  | 0.345011  | -4.900861 | -2.000379 |
| 6  | -2.767048 | -2.719711 | -3.119791 |
| 1  | -2.506102 | -2.661376 | -0.981500 |
| 1  | -1.928819 | -1.223711 | -1.802574 |
| 6  | -2.828350 | -4.245366 | -3.274277 |
| 1  | -1.479039 | -5.951362 | -3.300416 |
| 1  | -0.867324 | -4.530250 | -4.141940 |
| 1  | -3.778690 | -2.297983 | -3.068664 |
| 1  | -2.287933 | -2.281849 | -4.007452 |
| 1  | -3.350241 | -4.519956 | -4.199098 |
| 1  | -3.415260 | -4.665494 | -2.444512 |
| 6  | 0.422411  | -3.458144 | 0.866215  |
| 6  | 1.468402  | -3.213865 | 1.970388  |
| 6  | -0.992781 | -3.452486 | 1.475025  |
| 1  | 0.609390  | -4.446771 | 0.428303  |



|    |           |           |           |
|----|-----------|-----------|-----------|
| 6  | 1.333807  | -4.220524 | 3.123612  |
| 1  | 1.333386  | -2.196964 | 2.360195  |
| 1  | 2.482236  | -3.269796 | 1.559695  |
| 6  | -1.127440 | -4.461123 | 2.626492  |
| 1  | -1.207633 | -2.443681 | 1.843515  |
| 1  | -1.736575 | -3.683786 | 0.705951  |
| 6  | -0.080423 | -4.205935 | 3.717408  |
| 1  | 2.078301  | -3.995609 | 3.897278  |
| 1  | 1.561859  | -5.230142 | 2.751455  |
| 1  | -2.139052 | -4.404901 | 3.046889  |
| 1  | -1.003544 | -5.482146 | 2.235840  |
| 1  | -0.168417 | -4.951377 | 4.517286  |
| 1  | -0.269732 | -3.224181 | 4.173114  |
| 7  | -1.687004 | 0.883241  | 0.141919  |
| 6  | -2.525875 | 1.398850  | -0.976032 |
| 6  | -3.041107 | 2.861429  | -0.731709 |
| 6  | -1.925055 | 3.924531  | -0.643055 |
| 6  | -4.184581 | 3.284401  | -1.688102 |
| 1  | -3.491164 | 2.819840  | 0.259401  |
| 6  | -1.529994 | 4.571580  | -1.980055 |
| 1  | -1.054006 | 3.475925  | -0.159824 |
| 1  | -2.272231 | 4.716848  | 0.033513  |
| 6  | -3.752222 | 3.957329  | -3.001922 |
| 1  | -4.835339 | 2.423909  | -1.893448 |
| 1  | -4.807295 | 4.007004  | -1.143103 |
| 6  | -2.755352 | 5.093706  | -2.741667 |
| 1  | -1.004542 | 3.842089  | -2.605492 |
| 1  | -0.826101 | 5.391591  | -1.792043 |
| 1  | -4.640995 | 4.338204  | -3.520568 |
| 1  | -3.289904 | 3.229682  | -3.679160 |
| 1  | -2.450383 | 5.557165  | -3.688001 |
| 1  | -3.246594 | 5.879856  | -2.149273 |
| 16 | -2.423833 | 0.723541  | 1.614969  |
| 8  | -1.606629 | -0.241470 | 2.380686  |
| 8  | -2.702671 | 2.031400  | 2.247242  |
| 6  | -4.029673 | -0.038237 | 1.316198  |
| 6  | -5.189365 | 0.735264  | 1.320952  |
| 6  | -4.085965 | -1.403399 | 1.025128  |
| 6  | -6.412636 | 0.133228  | 1.019316  |
| 1  | -5.132610 | 1.788101  | 1.573094  |
| 6  | -5.311078 | -1.989490 | 0.725851  |
| 1  | -3.180145 | -1.993741 | 1.046107  |
| 6  | -6.493535 | -1.230938 | 0.713189  |
| 1  | -7.317669 | 0.734789  | 1.024762  |
| 1  | -5.354578 | -3.052468 | 0.501276  |
| 6  | -1.855137 | 1.247357  | -2.318617 |
| 6  | -0.571385 | 1.017333  | -2.587444 |
| 1  | -2.551157 | 1.351810  | -3.147691 |
| 1  | -0.216147 | 0.927081  | -3.610342 |
| 1  | 0.165505  | 0.877225  | -1.796963 |
| 1  | -3.438460 | 0.782278  | -1.040404 |
| 1  | -1.129815 | -0.397559 | -0.146749 |
| 6  | -7.814230 | -1.887449 | 0.394002  |
| 1  | -8.627228 | -1.157940 | 0.343492  |
| 1  | -7.773406 | -2.415192 | -0.565610 |
| 1  | -8.078627 | -2.629861 | 1.156445  |

Number of imaginary frequencies : 0  
 The smallest frequencies are : 16.0422 19.9586 23.9579 cm(-1)

Electronic energy : HF=-3492.5515888  
 Zero-point correction= 1.345517  
 (Hartree/Particle)  
 Thermal correction to Energy= 1.407409  
 Thermal correction to Enthalpy= 1.408354  
 Thermal correction to Gibbs Free Energy= 1.250534  
 Sum of electronic and zero-point Energies= -3491.206072  
 Sum of electronic and thermal Energies= -3491.144179  
 Sum of electronic and thermal Enthalpies= -3491.143235  
 Sum of electronic and thermal Free Energies= -3491.301055

.....  
 Cartesian Coordinates  
 .....

|    |           |           |           |
|----|-----------|-----------|-----------|
| 28 | -0.052437 | 0.166528  | -0.076993 |
| 15 | -1.307541 | -1.775485 | 0.435609  |
| 6  | -1.059733 | -2.888676 | -1.065144 |
| 6  | -1.346093 | -4.405658 | -0.983883 |
| 6  | -1.744556 | -2.289806 | -2.312534 |
| 1  | 0.018249  | -2.768014 | -1.222074 |
| 6  | -0.861332 | -5.113917 | -2.261047 |
| 1  | -2.418180 | -4.586943 | -0.876920 |
| 1  | -0.873489 | -4.854266 | -0.107629 |
| 6  | -1.287405 | -3.006686 | -3.593048 |
| 1  | -2.835532 | -2.374628 | -2.217785 |
| 1  | -1.517055 | -1.221381 | -2.386452 |
| 6  | -1.523839 | -4.520824 | -3.512198 |
| 1  | -1.071804 | -6.187994 | -2.189782 |
| 1  | 0.228623  | -5.010681 | -2.344654 |
| 1  | -1.804686 | -2.582316 | -4.462631 |
| 1  | -0.215627 | -2.816381 | -3.735778 |
| 1  | -1.144531 | -5.012974 | -4.415826 |
| 1  | -2.605294 | -4.718097 | -3.475929 |
| 6  | -3.185538 | -1.650103 | 0.650410  |
| 6  | -4.006844 | -2.949095 | 0.513043  |
| 6  | -3.586047 | -0.939979 | 1.961594  |
| 1  | -3.470895 | -1.000248 | -0.183355 |
| 6  | -5.520685 | -2.683194 | 0.609232  |
| 1  | -3.709554 | -3.660486 | 1.294911  |
| 1  | -3.809731 | -3.429416 | -0.445275 |
| 6  | -5.090679 | -0.640252 | 2.020272  |
| 1  | -3.349771 | -1.599486 | 2.802736  |
| 1  | -3.000790 | -0.027881 | 2.107218  |
| 6  | -5.906341 | -1.932603 | 1.888103  |
| 1  | -6.061926 | -3.635095 | 0.543844  |
| 1  | -5.830233 | -2.089694 | -0.262591 |
| 1  | -5.328315 | -0.127190 | 2.960044  |
| 1  | -5.364097 | 0.045775  | 1.209025  |
| 1  | -6.981007 | -1.714764 | 1.894421  |
| 1  | -5.707767 | -2.572782 | 2.759232  |
| 6  | -0.728422 | -2.783527 | 1.925391  |
| 6  | 0.637642  | -3.462741 | 1.687525  |

|    |           |           |           |
|----|-----------|-----------|-----------|
| 6  | -0.623953 | -1.916980 | 3.205345  |
| 1  | -1.488025 | -3.564325 | 2.080650  |
| 6  | 1.079409  | -4.301164 | 2.895690  |
| 1  | 1.376722  | -2.684188 | 1.499688  |
| 1  | 0.622088  | -4.095611 | 0.800636  |
| 6  | -0.177202 | -2.747373 | 4.419774  |
| 1  | 0.101594  | -1.120131 | 3.025717  |
| 1  | -1.569648 | -1.429160 | 3.441107  |
| 6  | 1.164535  | -3.442619 | 4.161970  |
| 1  | 2.050553  | -4.763159 | 2.678694  |
| 1  | 0.365932  | -5.124208 | 3.054492  |
| 1  | -0.106708 | -2.092138 | 5.296766  |
| 1  | -0.942238 | -3.504194 | 4.651804  |
| 1  | 1.456144  | -4.053586 | 5.025459  |
| 1  | 1.944243  | -2.682689 | 4.021256  |
| 15 | -1.271532 | 1.953679  | -0.421859 |
| 6  | -3.157446 | 1.795414  | -0.562546 |
| 6  | -4.007012 | 3.065981  | -0.347680 |
| 6  | -3.574556 | 1.108836  | -1.880210 |
| 1  | -3.394183 | 1.108356  | 0.255362  |
| 6  | -5.509886 | 2.736493  | -0.352474 |
| 1  | -3.811363 | 3.781322  | -1.153815 |
| 1  | -3.744103 | 3.562595  | 0.591109  |
| 6  | -5.076168 | 0.780936  | -1.901184 |
| 1  | -3.358515 | 1.775125  | -2.725370 |
| 1  | -2.987272 | 0.200404  | -2.041754 |
| 6  | -5.927943 | 2.032478  | -1.650721 |
| 1  | -6.088851 | 3.657760  | -0.214644 |
| 1  | -5.740762 | 2.091288  | 0.505552  |
| 1  | -5.341087 | 0.321617  | -2.861116 |
| 1  | -5.295170 | 0.035348  | -1.126597 |
| 1  | -6.991853 | 1.769273  | -1.617367 |
| 1  | -5.802006 | 2.728417  | -2.492507 |
| 6  | -0.846356 | 2.997768  | -1.947731 |
| 6  | -1.131541 | 4.511492  | -1.808353 |
| 6  | 0.584896  | 2.798462  | -2.482088 |
| 1  | -1.525393 | 2.603376  | -2.714250 |
| 6  | -0.943850 | 5.233807  | -3.153097 |
| 1  | -0.440324 | 4.943767  | -1.075462 |
| 1  | -2.138269 | 4.698415  | -1.430900 |
| 6  | 0.784285  | 3.517077  | -3.825300 |
| 1  | 1.301193  | 3.194502  | -1.753631 |
| 1  | 0.808827  | 1.734970  | -2.588568 |
| 6  | 0.465250  | 5.014053  | -3.718587 |
| 1  | -1.144052 | 6.304865  | -3.027556 |
| 1  | -1.686890 | 4.857404  | -3.870960 |
| 1  | 1.814139  | 3.367886  | -4.172125 |
| 1  | 0.129804  | 3.058577  | -4.581000 |
| 1  | 0.566562  | 5.501560  | -4.695800 |
| 1  | 1.197158  | 5.489966  | -3.050265 |
| 6  | -1.035496 | 3.079258  | 1.058399  |
| 6  | -1.552102 | 2.382818  | 2.336191  |
| 6  | 0.435713  | 3.502901  | 1.240158  |
| 1  | -1.637873 | 3.978114  | 0.877017  |
| 6  | -1.344897 | 3.257787  | 3.582625  |
| 1  | -1.006808 | 1.439415  | 2.459215  |
| 1  | -2.616107 | 2.139009  | 2.236468  |

|    |           |           |           |
|----|-----------|-----------|-----------|
| 6  | 0.617559  | 4.393685  | 2.477346  |
| 1  | 1.039686  | 2.604479  | 1.367729  |
| 1  | 0.809211  | 4.017611  | 0.349950  |
| 6  | 0.123371  | 3.675272  | 3.739487  |
| 1  | -1.687364 | 2.713713  | 4.471327  |
| 1  | -1.972082 | 4.158217  | 3.502237  |
| 1  | 1.676795  | 4.658528  | 2.576649  |
| 1  | 0.063733  | 5.335979  | 2.347873  |
| 1  | 0.245289  | 4.315239  | 4.622018  |
| 1  | 0.736535  | 2.778630  | 3.897797  |
| 7  | 1.867296  | -0.703606 | 0.156666  |
| 6  | 2.937323  | -1.189016 | -0.762766 |
| 6  | 3.465314  | -2.634448 | -0.393401 |
| 6  | 2.746320  | -3.821474 | -1.068871 |
| 6  | 4.996556  | -2.779979 | -0.548024 |
| 1  | 3.273441  | -2.699506 | 0.677028  |
| 6  | 3.245182  | -4.183082 | -2.479463 |
| 1  | 1.671992  | -3.633470 | -1.097240 |
| 1  | 2.885529  | -4.700033 | -0.423587 |
| 6  | 5.473412  | -3.084391 | -1.975944 |
| 1  | 5.493508  | -1.887170 | -0.150282 |
| 1  | 5.313752  | -3.614064 | 0.093940  |
| 6  | 4.772666  | -4.334402 | -2.528616 |
| 1  | 2.933760  | -3.413222 | -3.193544 |
| 1  | 2.764157  | -5.114853 | -2.804419 |
| 1  | 6.561213  | -3.227561 | -1.979527 |
| 1  | 5.277862  | -2.229453 | -2.636861 |
| 1  | 5.102351  | -4.540951 | -3.554450 |
| 1  | 5.070034  | -5.202846 | -1.922704 |
| 16 | 2.477041  | -0.035168 | 1.496581  |
| 8  | 1.336999  | 0.466801  | 2.312570  |
| 8  | 3.452977  | -0.901189 | 2.203895  |
| 6  | 3.424986  | 1.449582  | 1.043311  |
| 6  | 4.175053  | 2.074772  | 2.043364  |
| 6  | 3.346268  | 2.013020  | -0.229222 |
| 6  | 4.822950  | 3.276711  | 1.768453  |
| 1  | 4.243806  | 1.623188  | 3.027676  |
| 6  | 4.010854  | 3.210988  | -0.496144 |
| 1  | 2.755726  | 1.529432  | -0.996661 |
| 6  | 4.750374  | 3.866225  | 0.495786  |
| 1  | 5.396526  | 3.766370  | 2.551932  |
| 1  | 3.943115  | 3.645783  | -1.490554 |
| 6  | 2.587186  | -1.037419 | -2.219586 |
| 6  | 1.408631  | -0.749950 | -2.771784 |
| 1  | 3.435662  | -1.201731 | -2.880100 |
| 1  | 1.294316  | -0.672266 | -3.849516 |
| 1  | 0.524908  | -0.567117 | -2.167614 |
| 1  | 3.826188  | -0.551943 | -0.636434 |
| 1  | 0.715267  | 1.329359  | -0.422325 |
| 6  | 5.479521  | 5.154527  | 0.202385  |
| 1  | 5.407187  | 5.856142  | 1.040086  |
| 1  | 6.547171  | 4.971012  | 0.027076  |
| 1  | 5.081461  | 5.648958  | -0.688924 |

-----  
**3a**  
-----

Number of imaginary frequencies : 0  
The smallest frequencies are : 12.9481 17.9434 28.7109 cm(-1)

Electronic energy : HF=-2445.2231071  
Zero-point correction= 0.856451  
(Hartree/Particle)  
Thermal correction to Energy= 0.898726  
Thermal correction to Enthalpy= 0.899670  
Thermal correction to Gibbs Free Energy= 0.779993  
Sum of electronic and zero-point Energies= -2444.366656  
Sum of electronic and thermal Energies= -2444.324381  
Sum of electronic and thermal Enthalpies= -2444.323437  
Sum of electronic and thermal Free Energies= -2444.443114

.....  
Cartesian Coordinates  
.....

|    |           |           |           |
|----|-----------|-----------|-----------|
| 28 | -0.286485 | 0.205891  | 0.357345  |
| 15 | 1.777359  | 0.149726  | 0.088682  |
| 6  | 2.490209  | 1.834353  | -0.358389 |
| 6  | 4.021100  | 1.987849  | -0.392622 |
| 6  | 1.871645  | 2.350192  | -1.673640 |
| 1  | 2.101644  | 2.475207  | 0.445428  |
| 6  | 4.419009  | 3.452637  | -0.645909 |
| 1  | 4.430152  | 1.366936  | -1.200166 |
| 1  | 4.472454  | 1.632592  | 0.540662  |
| 6  | 2.263865  | 3.812376  | -1.935330 |
| 1  | 2.225925  | 1.736315  | -2.513830 |
| 1  | 0.783247  | 2.235037  | -1.639502 |
| 6  | 3.789986  | 3.989663  | -1.940105 |
| 1  | 5.511454  | 3.544331  | -0.686534 |
| 1  | 4.083167  | 4.066523  | 0.202089  |
| 1  | 1.837246  | 4.153454  | -2.886747 |
| 1  | 1.828568  | 4.446282  | -1.149658 |
| 1  | 4.052939  | 5.045000  | -2.082410 |
| 1  | 4.210916  | 3.442604  | -2.796225 |
| 6  | 2.523796  | -0.995830 | -1.224633 |
| 6  | 3.946937  | -1.535351 | -0.976901 |
| 6  | 1.566397  | -2.161889 | -1.539298 |
| 1  | 2.560043  | -0.360585 | -2.120971 |
| 6  | 4.444379  | -2.355727 | -2.179844 |
| 1  | 3.943410  | -2.180968 | -0.089485 |
| 1  | 4.647274  | -0.721886 | -0.767481 |
| 6  | 2.056669  | -2.992067 | -2.733948 |
| 1  | 1.490703  | -2.810561 | -0.656422 |
| 1  | 0.557579  | -1.775071 | -1.715713 |
| 6  | 3.485262  | -3.508527 | -2.510073 |
| 1  | 5.450850  | -2.742885 | -1.978084 |
| 1  | 4.531113  | -1.695385 | -3.054688 |
| 1  | 1.371909  | -3.830129 | -2.917518 |
| 1  | 2.034645  | -2.366643 | -3.637986 |
| 1  | 3.837829  | -4.059266 | -3.390547 |
| 1  | 3.482005  | -4.221948 | -1.673066 |
| 6  | 2.662624  | -0.310463 | 1.685235  |
| 6  | 2.431851  | 0.763503  | 2.768012  |
| 6  | 2.139841  | -1.676626 | 2.179289  |
| 1  | 3.741440  | -0.389775 | 1.498621  |
| 6  | 3.044007  | 0.355638  | 4.118311  |

|    |           |           |           |
|----|-----------|-----------|-----------|
| 1  | 1.347775  | 0.911508  | 2.880081  |
| 1  | 2.850489  | 1.725889  | 2.452220  |
| 6  | 2.762096  | -2.083773 | 3.522978  |
| 1  | 1.048604  | -1.604002 | 2.288611  |
| 1  | 2.328724  | -2.454289 | 1.430585  |
| 6  | 2.520649  | -1.007588 | 4.589735  |
| 1  | 2.833103  | 1.127180  | 4.869316  |
| 1  | 4.138270  | 0.306842  | 4.017932  |
| 1  | 2.346814  | -3.045551 | 3.848573  |
| 1  | 3.844300  | -2.233793 | 3.395279  |
| 1  | 2.994350  | -1.291797 | 5.537343  |
| 1  | 1.441492  | -0.932545 | 4.783756  |
| 7  | -2.141039 | 0.427364  | 1.018661  |
| 6  | -3.140370 | 1.350890  | 0.365253  |
| 6  | -2.761515 | 2.827273  | 0.711741  |
| 6  | -1.441616 | 3.354560  | 0.106719  |
| 6  | -3.921772 | 3.820790  | 0.455443  |
| 1  | -2.627373 | 2.802070  | 1.803618  |
| 6  | -1.564728 | 3.872849  | -1.333583 |
| 1  | -0.672097 | 2.570404  | 0.166925  |
| 1  | -1.096167 | 4.180243  | 0.744556  |
| 6  | -4.019916 | 4.356168  | -0.983161 |
| 1  | -4.875312 | 3.375051  | 0.765938  |
| 1  | -3.756377 | 4.680323  | 1.118800  |
| 6  | -2.676427 | 4.922635  | -1.461679 |
| 1  | -1.771395 | 3.036126  | -2.009155 |
| 1  | -0.604678 | 4.299178  | -1.645382 |
| 1  | -4.798181 | 5.128056  | -1.025184 |
| 1  | -4.336665 | 3.562540  | -1.669495 |
| 1  | -2.758423 | 5.270357  | -2.498631 |
| 1  | -2.417186 | 5.802026  | -0.853807 |
| 16 | -2.859835 | -1.070911 | 1.673002  |
| 8  | -1.979008 | -1.415146 | 2.796250  |
| 8  | -4.294699 | -0.839361 | 1.902352  |
| 6  | -2.695519 | -2.291760 | 0.383287  |
| 6  | -3.811382 | -2.623306 | -0.381725 |
| 6  | -1.455918 | -2.901851 | 0.178897  |
| 6  | -3.673871 | -3.581238 | -1.386670 |
| 1  | -4.763222 | -2.140820 | -0.192993 |
| 6  | -1.342989 | -3.859179 | -0.823719 |
| 1  | -0.602226 | -2.610333 | 0.780975  |
| 6  | -2.443910 | -4.208157 | -1.623785 |
| 1  | -4.536183 | -3.844676 | -1.992533 |
| 1  | -0.384735 | -4.340667 | -0.994703 |
| 6  | -3.360234 | 1.023549  | -1.091113 |
| 6  | -2.606706 | 0.262657  | -1.884468 |
| 1  | -4.272141 | 1.460162  | -1.491994 |
| 1  | -2.887754 | 0.092087  | -2.920216 |
| 1  | -1.686413 | -0.206946 | -1.535722 |
| 1  | -4.100465 | 1.187126  | 0.869668  |
| 1  | -1.818377 | 0.869298  | 1.891755  |
| 6  | -2.287726 | -5.239177 | -2.713238 |
| 1  | -1.533370 | -4.925041 | -3.443821 |
| 1  | -1.955334 | -6.199322 | -2.302094 |
| 1  | -3.225227 | -5.408045 | -3.249728 |

-----  
**TS [3a-4a]**

-----  
Number of imaginary frequencies : 1  
The smallest frequencies are : -1120.9202 11.5526 21.4870 cm(-1)

Electronic energy : HF=-2445.2057761  
Zero-point correction= 0.850692  
(Hartree/Particle)  
Thermal correction to Energy= 0.892844  
Thermal correction to Enthalpy= 0.893788  
Thermal correction to Gibbs Free Energy= 0.773748  
Sum of electronic and zero-point Energies= -2444.355084  
Sum of electronic and thermal Energies= -2444.312932  
Sum of electronic and thermal Enthalpies= -2444.311988  
Sum of electronic and thermal Free Energies= -2444.432028

.....  
Cartesian Coordinates  
.....

|    |           |           |           |
|----|-----------|-----------|-----------|
| 28 | -0.266402 | 0.240823  | 0.157517  |
| 15 | 1.829464  | -0.146898 | 0.050816  |
| 6  | 2.829780  | 1.376510  | -0.373321 |
| 6  | 4.362605  | 1.248603  | -0.320402 |
| 6  | 2.384869  | 1.971582  | -1.725735 |
| 1  | 2.516940  | 2.087150  | 0.404215  |
| 6  | 5.029525  | 2.614507  | -0.553444 |
| 1  | 4.696040  | 0.551714  | -1.100458 |
| 1  | 4.687979  | 0.830920  | 0.638786  |
| 6  | 3.047416  | 3.336990  | -1.966329 |
| 1  | 2.669482  | 1.290460  | -2.539904 |
| 1  | 1.293334  | 2.061472  | -1.757666 |
| 6  | 4.578687  | 3.241162  | -1.881766 |
| 1  | 6.120889  | 2.508002  | -0.532985 |
| 1  | 4.762848  | 3.286552  | 0.274443  |
| 1  | 2.743518  | 3.734121  | -2.942248 |
| 1  | 2.684500  | 4.047515  | -1.210192 |
| 1  | 5.030493  | 4.232298  | -2.007484 |
| 1  | 4.945004  | 2.621118  | -2.712644 |
| 6  | 2.369249  | -1.448259 | -1.201698 |
| 6  | 3.638043  | -2.255513 | -0.861455 |
| 6  | 1.199989  | -2.399565 | -1.537974 |
| 1  | 2.576882  | -0.862039 | -2.108468 |
| 6  | 4.004018  | -3.217900 | -2.004574 |
| 1  | 3.465821  | -2.840856 | 0.050409  |
| 1  | 4.480287  | -1.590015 | -0.650031 |
| 6  | 1.565727  | -3.365931 | -2.673816 |
| 1  | 0.935169  | -2.979650 | -0.644433 |
| 1  | 0.306066  | -1.820627 | -1.797933 |
| 6  | 2.838922  | -4.158183 | -2.344636 |
| 1  | 4.894931  | -3.796847 | -1.732303 |
| 1  | 4.269712  | -2.632747 | -2.896591 |
| 1  | 0.728208  | -4.047190 | -2.869025 |
| 1  | 1.723978  | -2.791833 | -3.597989 |
| 1  | 3.109731  | -4.812893 | -3.181617 |
| 1  | 2.642635  | -4.812789 | -1.483241 |
| 6  | 2.472162  | -0.715761 | 1.714001  |
| 6  | 2.394743  | 0.423270  | 2.752384  |
| 6  | 1.645675  | -1.928775 | 2.196712  |
| 1  | 3.521343  | -1.018975 | 1.603453  |

|    |           |           |           |
|----|-----------|-----------|-----------|
| 6  | 2.831244  | -0.053408 | 4.146709  |
| 1  | 1.358748  | 0.786648  | 2.793334  |
| 1  | 3.018033  | 1.270145  | 2.444458  |
| 6  | 2.095161  | -2.404738 | 3.585798  |
| 1  | 0.588376  | -1.634851 | 2.238744  |
| 1  | 1.719698  | -2.753360 | 1.478794  |
| 6  | 2.013899  | -1.266389 | 4.611366  |
| 1  | 2.735905  | 0.770805  | 4.863987  |
| 1  | 3.896965  | -0.323941 | 4.117900  |
| 1  | 1.473504  | -3.250057 | 3.903961  |
| 1  | 3.129745  | -2.774294 | 3.530494  |
| 1  | 2.363283  | -1.608292 | 5.593235  |
| 1  | 0.963228  | -0.969278 | 4.731460  |
| 7  | -1.999703 | 0.697531  | 0.745514  |
| 6  | -2.774032 | 1.849837  | 0.220583  |
| 6  | -2.094995 | 3.194762  | 0.648245  |
| 6  | -0.752422 | 3.526880  | -0.039290 |
| 6  | -3.044268 | 4.417734  | 0.589204  |
| 1  | -1.880886 | 3.023395  | 1.710606  |
| 6  | -0.891694 | 4.173099  | -1.424861 |
| 1  | -0.134596 | 2.622412  | -0.099532 |
| 1  | -0.209745 | 4.224312  | 0.615074  |
| 6  | -3.150157 | 5.114424  | -0.779265 |
| 1  | -4.041192 | 4.137536  | 0.951878  |
| 1  | -2.656200 | 5.155097  | 1.304993  |
| 6  | -1.765641 | 5.433222  | -1.361935 |
| 1  | -1.330627 | 3.453880  | -2.126033 |
| 1  | 0.104407  | 4.420848  | -1.811969 |
| 1  | -3.736308 | 6.034877  | -0.667855 |
| 1  | -3.702335 | 4.488800  | -1.490090 |
| 1  | -1.866331 | 5.884146  | -2.356718 |
| 1  | -1.270059 | 6.181191  | -0.725715 |
| 16 | -2.822460 | -0.488700 | 1.606797  |
| 8  | -1.902047 | -0.980412 | 2.646241  |
| 8  | -4.157101 | 0.008735  | 1.985560  |
| 6  | -3.065737 | -1.837346 | 0.445123  |
| 6  | -4.291188 | -1.992836 | -0.197260 |
| 6  | -1.986755 | -2.673716 | 0.151346  |
| 6  | -4.430793 | -2.998833 | -1.155361 |
| 1  | -5.116821 | -1.335457 | 0.051680  |
| 6  | -2.140098 | -3.666754 | -0.810348 |
| 1  | -1.041108 | -2.528122 | 0.663001  |
| 6  | -3.361849 | -3.843677 | -1.481225 |
| 1  | -5.384566 | -3.123226 | -1.661245 |
| 1  | -1.300987 | -4.316270 | -1.046085 |
| 6  | -3.095869 | 1.699028  | -1.250974 |
| 6  | -2.726608 | 0.710262  | -2.066058 |
| 1  | -3.743609 | 2.479177  | -1.644171 |
| 1  | -3.043602 | 0.695310  | -3.105104 |
| 1  | -2.112872 | -0.119472 | -1.727672 |
| 1  | -3.735074 | 1.850494  | 0.748993  |
| 1  | -0.787926 | 0.944467  | 1.359218  |
| 6  | -3.519258 | -4.944297 | -2.501069 |
| 1  | -3.695119 | -5.909359 | -2.009215 |
| 1  | -4.364291 | -4.757962 | -3.170169 |
| 1  | -2.617753 | -5.054078 | -3.112873 |



## 4a

-----  
 Number of imaginary frequencies : 0  
 The smallest frequencies are : 13.7045 17.9257 24.0946 cm(-1)

Electronic energy : HF=-2445.237033  
 Zero-point correction= 0.852843  
 (Hartree/Particle)  
 Thermal correction to Energy= 0.895307  
 Thermal correction to Enthalpy= 0.896251  
 Thermal correction to Gibbs Free Energy= 0.775626  
 Sum of electronic and zero-point Energies= -2444.384190  
 Sum of electronic and thermal Energies= -2444.341726  
 Sum of electronic and thermal Enthalpies= -2444.340782  
 Sum of electronic and thermal Free Energies= -2444.461407

.....  
 Cartesian Coordinates  
 .....

|    |           |           |           |
|----|-----------|-----------|-----------|
| 28 | 0.125910  | -0.526811 | 0.779218  |
| 15 | -1.865686 | -0.352418 | 0.042130  |
| 6  | -2.387801 | -1.963305 | -0.732565 |
| 6  | -3.797430 | -1.996408 | -1.348924 |
| 6  | -1.332322 | -2.458424 | -1.744616 |
| 1  | -2.360428 | -2.654953 | 0.119971  |
| 6  | -4.140210 | -3.411117 | -1.846033 |
| 1  | -3.836401 | -1.303292 | -2.199097 |
| 1  | -4.548093 | -1.657395 | -0.625793 |
| 6  | -1.678373 | -3.868611 | -2.246176 |
| 1  | -1.291704 | -1.772900 | -2.602688 |
| 1  | -0.336584 | -2.447109 | -1.288919 |
| 6  | -3.091640 | -3.923615 | -2.844288 |
| 1  | -5.137048 | -3.413404 | -2.302651 |
| 1  | -4.186264 | -4.092432 | -0.984809 |
| 1  | -0.934944 | -4.192442 | -2.983853 |
| 1  | -1.612784 | -4.571672 | -1.403969 |
| 1  | -3.334069 | -4.945775 | -3.157752 |
| 1  | -3.123730 | -3.300733 | -3.749934 |
| 6  | -2.003509 | 0.959597  | -1.297839 |
| 6  | -3.403194 | 1.580007  | -1.492700 |
| 6  | -0.948145 | 2.074194  | -1.117065 |
| 1  | -1.744980 | 0.409491  | -2.214236 |
| 6  | -3.410305 | 2.541013  | -2.693847 |
| 1  | -3.680583 | 2.141005  | -0.591136 |
| 1  | -4.164787 | 0.806479  | -1.628668 |
| 6  | -0.958653 | 3.046200  | -2.305610 |
| 1  | -1.151381 | 2.628007  | -0.192509 |
| 1  | 0.051841  | 1.648356  | -0.993768 |
| 6  | -2.353538 | 3.643039  | -2.536475 |
| 1  | -4.408671 | 2.979529  | -2.809934 |
| 1  | -3.207874 | 1.970230  | -3.611377 |
| 1  | -0.223436 | 3.838446  | -2.132064 |
| 1  | -0.636670 | 2.508951  | -3.209453 |
| 1  | -2.349867 | 4.295899  | -3.417478 |
| 1  | -2.620046 | 4.275473  | -1.677436 |
| 6  | -3.131446 | 0.066472  | 1.342741  |
| 6  | -3.421445 | -1.118885 | 2.286349  |
| 6  | -2.647310 | 1.298450  | 2.141274  |

|    |           |           |           |
|----|-----------|-----------|-----------|
| 1  | -4.063935 | 0.322049  | 0.823737  |
| 6  | -4.416727 | -0.721804 | 3.388539  |
| 1  | -2.483220 | -1.448791 | 2.750442  |
| 1  | -3.818225 | -1.971209 | 1.723835  |
| 6  | -3.638731 | 1.678287  | 3.251353  |
| 1  | -1.665822 | 1.071110  | 2.578440  |
| 1  | -2.497846 | 2.152817  | 1.472197  |
| 6  | -3.918613 | 0.492444  | 4.183229  |
| 1  | -4.583523 | -1.575989 | 4.055290  |
| 1  | -5.388459 | -0.484209 | 2.931842  |
| 1  | -3.243574 | 2.528112  | 3.819873  |
| 1  | -4.582208 | 2.013092  | 2.795967  |
| 1  | -4.649999 | 0.773003  | 4.950431  |
| 1  | -2.992317 | 0.223470  | 4.709478  |
| 7  | 1.953942  | -0.199772 | 0.731180  |
| 6  | 3.031680  | -1.015111 | 0.136922  |
| 6  | 3.194821  | -2.352633 | 0.942334  |
| 6  | 2.052081  | -3.374303 | 0.763147  |
| 6  | 4.571795  | -3.038014 | 0.766267  |
| 1  | 3.156565  | -1.997958 | 1.977810  |
| 6  | 2.188080  | -4.274882 | -0.475198 |
| 1  | 1.086924  | -2.854119 | 0.751156  |
| 1  | 2.034881  | -4.016705 | 1.654519  |
| 6  | 4.701175  | -3.977124 | -0.445674 |
| 1  | 5.365962  | -2.280946 | 0.750093  |
| 1  | 4.746306  | -3.639893 | 1.668828  |
| 6  | 3.547223  | -4.988515 | -0.500220 |
| 1  | 2.072125  | -3.676494 | -1.386510 |
| 1  | 1.374240  | -5.011078 | -0.480590 |
| 1  | 5.663520  | -4.501548 | -0.394555 |
| 1  | 4.720198  | -3.403807 | -1.380420 |
| 1  | 3.635061  | -5.620223 | -1.392814 |
| 1  | 3.616017  | -5.659695 | 0.368494  |
| 16 | 2.417368  | 1.080389  | 1.667501  |
| 8  | 1.359679  | 1.322200  | 2.672048  |
| 8  | 3.813890  | 0.929151  | 2.128041  |
| 6  | 2.371471  | 2.503371  | 0.557415  |
| 6  | 3.073035  | 2.471340  | -0.651494 |
| 6  | 1.632746  | 3.628422  | 0.917651  |
| 6  | 3.022866  | 3.572958  | -1.499744 |
| 1  | 3.631230  | 1.588122  | -0.940360 |
| 6  | 1.596132  | 4.728754  | 0.058336  |
| 1  | 1.088192  | 3.629185  | 1.855277  |
| 6  | 2.287674  | 4.720626  | -1.158894 |
| 1  | 3.559592  | 3.543803  | -2.444739 |
| 1  | 1.016116  | 5.604429  | 0.338030  |
| 6  | 2.873367  | -1.175728 | -1.357582 |
| 6  | 1.923229  | -0.664715 | -2.141591 |
| 1  | 3.665746  | -1.757540 | -1.822218 |
| 1  | 1.928530  | -0.836975 | -3.214490 |
| 1  | 1.117091  | -0.059710 | -1.742023 |
| 1  | 3.987443  | -0.495085 | 0.288079  |
| 1  | -0.581353 | -1.403246 | 1.654917  |
| 6  | 2.257054  | 5.911153  | -2.085348 |
| 1  | 1.477605  | 6.624362  | -1.801102 |
| 1  | 3.215567  | 6.445062  | -2.070370 |
| 1  | 2.075608  | 5.606394  | -3.122092 |

-----  
**3b**  
-----

Number of imaginary frequencies : 0  
The smallest frequencies are : 21.3217 22.6519 29.1559 cm(-1)

Electronic energy : HF=-2445.2442805  
Zero-point correction= 0.856426  
(Hartree/Particle)  
Thermal correction to Energy= 0.898212  
Thermal correction to Enthalpy= 0.899156  
Thermal correction to Gibbs Free Energy= 0.781437  
Sum of electronic and zero-point Energies= -2444.387855  
Sum of electronic and thermal Energies= -2444.346069  
Sum of electronic and thermal Enthalpies= -2444.345125  
Sum of electronic and thermal Free Energies= -2444.462844

.....  
Cartesian Coordinates  
.....

|    |           |           |           |
|----|-----------|-----------|-----------|
| 28 | -0.324979 | 0.984654  | -0.987378 |
| 15 | -1.962850 | -0.102486 | -0.020982 |
| 6  | -1.487024 | -0.242760 | 1.793963  |
| 6  | -2.503534 | -0.869401 | 2.764501  |
| 6  | -0.111510 | -0.926098 | 1.950395  |
| 1  | -1.348900 | 0.809333  | 2.080088  |
| 6  | -2.006238 | -0.764021 | 4.217014  |
| 1  | -2.637605 | -1.929116 | 2.512439  |
| 1  | -3.485396 | -0.393185 | 2.667135  |
| 6  | 0.392914  | -0.826971 | 3.397262  |
| 1  | -0.190182 | -1.985903 | 1.673375  |
| 1  | 0.611984  | -0.485201 | 1.257039  |
| 6  | -0.624909 | -1.414110 | 4.385852  |
| 1  | -2.731753 | -1.227386 | 4.896605  |
| 1  | -1.944510 | 0.297060  | 4.498006  |
| 1  | 1.358825  | -1.337407 | 3.492020  |
| 1  | 0.572566  | 0.229334  | 3.642615  |
| 1  | -0.270905 | -1.294528 | 5.416582  |
| 1  | -0.714649 | -2.495535 | 4.207276  |
| 6  | -2.246330 | -1.886289 | -0.556859 |
| 6  | -3.617971 | -2.507450 | -0.221112 |
| 6  | -1.915656 | -2.103604 | -2.048229 |
| 1  | -1.483850 | -2.432398 | 0.016541  |
| 6  | -3.638420 | -4.005325 | -0.571447 |
| 1  | -4.400635 | -1.998628 | -0.798365 |
| 1  | -3.869588 | -2.369638 | 0.834080  |
| 6  | -1.940169 | -3.597402 | -2.406365 |
| 1  | -2.646078 | -1.567610 | -2.669395 |
| 1  | -0.939773 | -1.668648 | -2.274732 |
| 6  | -3.284952 | -4.244944 | -2.046180 |
| 1  | -4.623598 | -4.428597 | -0.340880 |
| 1  | -2.913691 | -4.532119 | 0.066409  |
| 1  | -1.724536 | -3.730703 | -3.473349 |
| 1  | -1.134465 | -4.107201 | -1.857704 |
| 1  | -3.264834 | -5.319681 | -2.263936 |
| 1  | -4.072816 | -3.810356 | -2.677970 |
| 6  | -3.659648 | 0.694632  | 0.004119  |
| 6  | -3.621732 | 2.047961  | 0.744410  |

|    |           |           |           |
|----|-----------|-----------|-----------|
| 6  | -4.164711 | 0.900342  | -1.441103 |
| 1  | -4.360238 | 0.032998  | 0.529711  |
| 6  | -4.988768 | 2.749454  | 0.713745  |
| 1  | -2.874569 | 2.692994  | 0.262913  |
| 1  | -3.302634 | 1.917689  | 1.784502  |
| 6  | -5.530096 | 1.605433  | -1.474054 |
| 1  | -3.425586 | 1.503395  | -1.987463 |
| 1  | -4.229155 | -0.058229 | -1.966539 |
| 6  | -5.488685 | 2.943202  | -0.723570 |
| 1  | -4.921373 | 3.714804  | 1.229927  |
| 1  | -5.716638 | 2.144016  | 1.272674  |
| 1  | -5.843348 | 1.758373  | -2.513802 |
| 1  | -6.284736 | 0.953606  | -1.010758 |
| 1  | -6.479137 | 3.413824  | -0.724165 |
| 1  | -4.811978 | 3.630972  | -1.250578 |
| 7  | 3.803497  | 1.124913  | -1.120708 |
| 6  | 2.443651  | 1.451771  | -0.593063 |
| 6  | 2.449881  | 2.737369  | 0.279270  |
| 6  | 2.587378  | 4.068398  | -0.498916 |
| 6  | 1.254530  | 2.792620  | 1.257900  |
| 1  | 3.346917  | 2.633819  | 0.898051  |
| 6  | 1.272593  | 4.654974  | -1.049477 |
| 1  | 3.313562  | 3.955737  | -1.315230 |
| 1  | 3.024158  | 4.806911  | 0.186711  |
| 6  | -0.043206 | 3.337714  | 0.652081  |
| 1  | 1.085590  | 1.798884  | 1.688353  |
| 1  | 1.528135  | 3.450325  | 2.094613  |
| 6  | 0.176245  | 4.716594  | 0.022135  |
| 1  | 0.904230  | 4.051807  | -1.884744 |
| 1  | 1.465608  | 5.658188  | -1.448673 |
| 1  | -0.830814 | 3.370965  | 1.412190  |
| 1  | -0.430107 | 2.663475  | -0.147830 |
| 1  | -0.757455 | 5.095891  | -0.409769 |
| 1  | 0.469447  | 5.421289  | 0.813934  |
| 16 | 4.852709  | 0.262052  | -0.141541 |
| 8  | 6.101884  | 0.143015  | -0.907835 |
| 8  | 4.904464  | 0.766741  | 1.244149  |
| 6  | 3.985686  | -1.309244 | -0.085331 |
| 6  | 3.475297  | -1.770347 | 1.129030  |
| 6  | 3.782932  | -2.020861 | -1.268224 |
| 6  | 2.739847  | -2.953751 | 1.149785  |
| 1  | 3.643894  | -1.195729 | 2.032979  |
| 6  | 3.042393  | -3.200900 | -1.230195 |
| 1  | 4.175010  | -1.641747 | -2.205640 |
| 6  | 2.502711  | -3.679839 | -0.026923 |
| 1  | 2.332723  | -3.312420 | 2.091633  |
| 1  | 2.871246  | -3.752680 | -2.150393 |
| 6  | 1.440209  | 1.380177  | -1.727187 |
| 6  | 0.948227  | 0.127072  | -2.175876 |
| 1  | 1.477742  | 2.203578  | -2.441243 |
| 1  | 0.588599  | 0.029156  | -3.202089 |
| 1  | 1.327560  | -0.803393 | -1.750984 |
| 1  | 2.214485  | 0.622983  | 0.085280  |
| 1  | 4.299938  | 1.879916  | -1.588870 |
| 6  | 1.688117  | -4.949078 | 0.014547  |
| 1  | 2.187423  | -5.717228 | 0.617050  |
| 1  | 0.705967  | -4.775155 | 0.469053  |

1 1.529160 -5.361082 -0.985650

4b

Number of imaginary frequencies : 0  
The smallest frequencies are : 2.4670 18.5910 21.9960 cm(-1)

Electronic energy : HF=-2445.2284492  
Zero-point correction= 0.853695  
(Hartree/Particle)  
Thermal correction to Energy= 0.894585  
Thermal correction to Enthalpy= 0.895529  
Thermal correction to Gibbs Free Energy= 0.780963  
Sum of electronic and zero-point Energies= -2444.374754  
Sum of electronic and thermal Energies= -2444.333865  
Sum of electronic and thermal Enthalpies= -2444.332920  
Sum of electronic and thermal Free Energies= -2444.447486

.....  
Cartesian Coordinates  
.....

|    |           |           |           |
|----|-----------|-----------|-----------|
| 28 | -0.058402 | 0.799769  | 0.271477  |
| 15 | -1.931001 | -0.278580 | -0.050120 |
| 6  | -2.988814 | -0.299573 | 1.491721  |
| 6  | -4.399665 | -0.898031 | 1.349655  |
| 6  | -2.229509 | -0.955108 | 2.663946  |
| 1  | -3.081564 | 0.766594  | 1.734441  |
| 6  | -5.190411 | -0.756148 | 2.662108  |
| 1  | -4.322503 | -1.964083 | 1.098084  |
| 1  | -4.948494 | -0.418126 | 0.530758  |
| 6  | -3.021262 | -0.815112 | 3.973309  |
| 1  | -2.076037 | -2.023677 | 2.456943  |
| 1  | -1.236048 | -0.506844 | 2.755985  |
| 6  | -4.438890 | -1.390877 | 3.841305  |
| 1  | -6.183564 | -1.208753 | 2.551750  |
| 1  | -5.351762 | 0.311471  | 2.868172  |
| 1  | -2.482064 | -1.311215 | 4.789218  |
| 1  | -3.084840 | 0.249539  | 4.240013  |
| 1  | -5.000548 | -1.245302 | 4.772223  |
| 1  | -4.372237 | -2.476818 | 3.680740  |
| 6  | -1.922687 | -2.093190 | -0.575319 |
| 6  | -3.053294 | -2.536955 | -1.526803 |
| 6  | -0.552422 | -2.540151 | -1.117192 |
| 1  | -2.072691 | -2.621219 | 0.376250  |
| 6  | -3.013304 | -4.058533 | -1.749677 |
| 1  | -2.938563 | -2.033662 | -2.494931 |
| 1  | -4.033307 | -2.246760 | -1.136495 |
| 6  | -0.513112 | -4.057178 | -1.353401 |
| 1  | -0.344552 | -2.018801 | -2.060603 |
| 1  | 0.228143  | -2.239143 | -0.415163 |
| 6  | -1.647394 | -4.515726 | -2.280694 |
| 1  | -3.811807 | -4.354583 | -2.441000 |
| 1  | -3.219172 | -4.565040 | -0.795808 |
| 1  | 0.460562  | -4.344016 | -1.769667 |
| 1  | -0.605701 | -4.572856 | -0.386336 |
| 1  | -1.630308 | -5.605789 | -2.400365 |
| 1  | -1.489678 | -4.086256 | -3.280550 |
| 6  | -2.957316 | 0.640309  | -1.320115 |

|    |           |           |           |
|----|-----------|-----------|-----------|
| 6  | -3.361767 | 2.038078  | -0.804397 |
| 6  | -2.171905 | 0.778617  | -2.641816 |
| 1  | -3.871228 | 0.064664  | -1.513396 |
| 6  | -4.155458 | 2.819906  | -1.863249 |
| 1  | -2.450386 | 2.590543  | -0.538769 |
| 1  | -3.956948 | 1.957054  | 0.111074  |
| 6  | -2.977766 | 1.544107  | -3.701228 |
| 1  | -1.240958 | 1.320884  | -2.433756 |
| 1  | -1.877424 | -0.205150 | -3.023807 |
| 6  | -3.384263 | 2.931449  | -3.185469 |
| 1  | -4.402279 | 3.816989  | -1.478760 |
| 1  | -5.111388 | 2.308261  | -2.045877 |
| 1  | -2.390722 | 1.634195  | -4.623441 |
| 1  | -3.880986 | 0.971621  | -3.956482 |
| 1  | -3.985418 | 3.459678  | -3.935315 |
| 1  | -2.478504 | 3.533807  | -3.024077 |
| 7  | 2.628482  | 1.005775  | 1.385782  |
| 6  | 1.698061  | 1.809393  | 0.583890  |
| 6  | 1.728372  | 3.248766  | 1.120663  |
| 6  | 3.114746  | 3.928636  | 0.940989  |
| 6  | 0.608830  | 4.191948  | 0.613848  |
| 1  | 1.551074  | 3.138690  | 2.198586  |
| 6  | 3.334777  | 4.463800  | -0.480068 |
| 1  | 3.920467  | 3.237025  | 1.213077  |
| 1  | 3.175750  | 4.770368  | 1.644783  |
| 6  | 0.850078  | 4.879821  | -0.743114 |
| 1  | -0.335137 | 3.637965  | 0.605393  |
| 1  | 0.506982  | 4.983310  | 1.368512  |
| 6  | 2.254931  | 5.491245  | -0.847150 |
| 1  | 3.315604  | 3.631380  | -1.196220 |
| 1  | 4.331040  | 4.916175  | -0.554589 |
| 1  | 0.088400  | 5.656777  | -0.884276 |
| 1  | 0.706245  | 4.173441  | -1.569235 |
| 1  | 2.422677  | 5.886072  | -1.856621 |
| 1  | 2.332051  | 6.345545  | -0.158860 |
| 16 | 2.485159  | -0.609897 | 1.853012  |
| 8  | 3.170658  | -0.665625 | 3.154487  |
| 8  | 1.104683  | -1.113602 | 1.732775  |
| 6  | 3.461127  | -1.493350 | 0.638313  |
| 6  | 3.075747  | -2.793856 | 0.306663  |
| 6  | 4.600558  | -0.914156 | 0.077323  |
| 6  | 3.840213  | -3.513858 | -0.609113 |
| 1  | 2.181501  | -3.223764 | 0.743736  |
| 6  | 5.350134  | -1.648563 | -0.837874 |
| 1  | 4.871453  | 0.104234  | 0.332577  |
| 6  | 4.984881  | -2.955675 | -1.195242 |
| 1  | 3.538765  | -4.522901 | -0.877135 |
| 1  | 6.229187  | -1.196965 | -1.290016 |
| 6  | 1.459549  | 1.526295  | -0.789601 |
| 6  | 1.222224  | 0.243900  | -1.308222 |
| 1  | 1.110959  | 2.363468  | -1.384719 |
| 1  | 0.865827  | 0.168740  | -2.329886 |
| 1  | 1.739210  | -0.635392 | -0.945716 |
| 1  | -0.658040 | 1.440965  | 1.463672  |
| 1  | 2.893851  | 1.488011  | 2.240171  |
| 6  | 5.820327  | -3.748161 | -2.169344 |
| 1  | 6.650393  | -4.246484 | -1.652756 |

|   |          |           |           |
|---|----------|-----------|-----------|
| 1 | 5.231417 | -4.524684 | -2.666332 |
| 1 | 6.257016 | -3.104691 | -2.939395 |

-----  
**TS [3b-4b]**  
 -----

Number of imaginary frequencies : 1  
 The smallest frequencies are : -776.3819 11.9648 14.1683 cm(-1)

Electronic energy : HF=-2445.2083261  
 Zero-point correction= 0.851908  
 (Hartree/Particle)  
 Thermal correction to Energy= 0.893531  
 Thermal correction to Enthalpy= 0.894476  
 Thermal correction to Gibbs Free Energy= 0.776171  
 Sum of electronic and zero-point Energies= -2444.356418  
 Sum of electronic and thermal Energies= -2444.314795  
 Sum of electronic and thermal Enthalpies= -2444.313850  
 Sum of electronic and thermal Free Energies= -2444.432155

.....  
 Cartesian Coordinates  
 .....

|    |           |           |           |
|----|-----------|-----------|-----------|
| 28 | -0.036163 | 0.726659  | -0.113321 |
| 15 | -1.914149 | -0.323004 | -0.065981 |
| 6  | -2.894724 | -0.065250 | 1.512593  |
| 6  | -4.302796 | -0.683325 | 1.579937  |
| 6  | -2.064153 | -0.475591 | 2.745620  |
| 1  | -2.995170 | 1.028582  | 1.551395  |
| 6  | -5.019134 | -0.278785 | 2.880216  |
| 1  | -4.218303 | -1.777473 | 1.549458  |
| 1  | -4.905920 | -0.387260 | 0.713618  |
| 6  | -2.776617 | -0.072398 | 4.045639  |
| 1  | -1.915320 | -1.564313 | 2.746771  |
| 1  | -1.066913 | -0.029356 | 2.686536  |
| 6  | -4.193584 | -0.660844 | 4.117694  |
| 1  | -6.011022 | -0.745891 | 2.922354  |
| 1  | -5.183163 | 0.808484  | 2.874949  |
| 1  | -2.184964 | -0.394397 | 4.911172  |
| 1  | -2.837200 | 1.024501  | 4.096196  |
| 1  | -4.701962 | -0.329609 | 5.031415  |
| 1  | -4.123485 | -1.756668 | 4.176408  |
| 6  | -1.844807 | -2.198883 | -0.251078 |
| 6  | -3.046411 | -2.873989 | -0.943882 |
| 6  | -0.521245 | -2.650278 | -0.901518 |
| 1  | -1.823522 | -2.549064 | 0.790264  |
| 6  | -2.907056 | -4.405797 | -0.913281 |
| 1  | -3.100091 | -2.547729 | -1.990093 |
| 1  | -3.989490 | -2.577278 | -0.475555 |
| 6  | -0.385016 | -4.179972 | -0.887909 |
| 1  | -0.478494 | -2.287403 | -1.937096 |
| 1  | 0.314139  | -2.184389 | -0.374898 |
| 6  | -1.588573 | -4.863373 | -1.552963 |
| 1  | -3.760775 | -4.868182 | -1.424009 |
| 1  | -2.941487 | -4.748713 | 0.130631  |
| 1  | 0.545217  | -4.476608 | -1.388469 |
| 1  | -0.305772 | -4.521951 | 0.154348  |
| 1  | -1.493896 | -5.954451 | -1.493038 |

|    |           |           |           |
|----|-----------|-----------|-----------|
| 1  | -1.601209 | -4.606119 | -2.622100 |
| 6  | -3.055446 | 0.289721  | -1.422504 |
| 6  | -3.469042 | 1.755756  | -1.173983 |
| 6  | -2.357380 | 0.164881  | -2.793296 |
| 1  | -3.962166 | -0.328690 | -1.431059 |
| 6  | -4.340912 | 2.301429  | -2.316279 |
| 1  | -2.559307 | 2.366602  | -1.081087 |
| 1  | -4.010297 | 1.850658  | -0.226587 |
| 6  | -3.234411 | 0.704166  | -3.932917 |
| 1  | -1.414284 | 0.725799  | -2.750563 |
| 1  | -2.082230 | -0.876179 | -2.992334 |
| 6  | -3.645798 | 2.160177  | -3.676779 |
| 1  | -4.593326 | 3.350943  | -2.121383 |
| 1  | -5.291311 | 1.748657  | -2.337246 |
| 1  | -2.698709 | 0.619771  | -4.886510 |
| 1  | -4.137066 | 0.082562  | -4.023227 |
| 1  | -4.298995 | 2.522472  | -4.479877 |
| 1  | -2.747711 | 2.794264  | -3.689009 |
| 7  | 2.530169  | 1.100681  | 1.390660  |
| 6  | 1.566540  | 1.835403  | 0.549806  |
| 6  | 1.594322  | 3.312735  | 1.030044  |
| 6  | 2.948899  | 4.023193  | 0.772902  |
| 6  | 0.407499  | 4.184248  | 0.548371  |
| 1  | 1.471693  | 3.237086  | 2.119544  |
| 6  | 3.088647  | 4.613575  | -0.637932 |
| 1  | 3.778234  | 3.338270  | 0.981797  |
| 1  | 3.034163  | 4.845411  | 1.496832  |
| 6  | 0.572969  | 4.872926  | -0.817864 |
| 1  | -0.505771 | 3.577446  | 0.562397  |
| 1  | 0.273885  | 4.972706  | 1.300697  |
| 6  | 1.932415  | 5.574058  | -0.950133 |
| 1  | 3.115625  | 3.807996  | -1.381504 |
| 1  | 4.048222  | 5.139093  | -0.716382 |
| 1  | -0.240129 | 5.597845  | -0.946668 |
| 1  | 0.456216  | 4.148777  | -1.631948 |
| 1  | 2.044120  | 5.997034  | -1.955750 |
| 1  | 1.973335  | 6.419537  | -0.247844 |
| 16 | 2.490224  | -0.519557 | 1.862304  |
| 8  | 3.204254  | -0.509353 | 3.150082  |
| 8  | 1.145349  | -1.112909 | 1.786818  |
| 6  | 3.500465  | -1.351023 | 0.643087  |
| 6  | 3.161275  | -2.656708 | 0.284149  |
| 6  | 4.633369  | -0.728652 | 0.115783  |
| 6  | 3.965926  | -3.338634 | -0.626664 |
| 1  | 2.272416  | -3.119552 | 0.697259  |
| 6  | 5.423366  | -1.425189 | -0.794375 |
| 1  | 4.868886  | 0.292941  | 0.392336  |
| 6  | 5.105173  | -2.737011 | -1.179161 |
| 1  | 3.700795  | -4.351893 | -0.916330 |
| 1  | 6.298077  | -0.941117 | -1.220288 |
| 6  | 1.535472  | 1.584389  | -0.888542 |
| 6  | 1.439977  | 0.332342  | -1.522549 |
| 1  | 1.256654  | 2.441203  | -1.492689 |
| 1  | 1.283855  | 0.329263  | -2.598150 |
| 1  | 1.912242  | -0.564476 | -1.136448 |
| 1  | 0.211916  | 1.522931  | 1.166384  |
| 1  | 2.732034  | 1.602102  | 2.251837  |



|   |          |           |           |
|---|----------|-----------|-----------|
| 6 | 5.985826 | -3.488837 | -2.145562 |
| 1 | 6.810334 | -3.982334 | -1.615573 |
| 1 | 5.428758 | -4.265319 | -2.678085 |
| 1 | 6.431641 | -2.818415 | -2.886799 |

5

Number of imaginary frequencies : 0  
 The smallest frequencies are : 12.9488 15.5875 17.6573 cm(-1)

Electronic energy : HF=-3672.236785  
 Zero-point correction= 1.226640  
 (Hartree/Particle)  
 Thermal correction to Energy= 1.289615  
 Thermal correction to Enthalpy= 1.290559  
 Thermal correction to Gibbs Free Energy= 1.124993  
 Sum of electronic and zero-point Energies= -3671.010145  
 Sum of electronic and thermal Energies= -3670.947170  
 Sum of electronic and thermal Enthalpies= -3670.946226  
 Sum of electronic and thermal Free Energies= -3671.111792

Cartesian Coordinates

|    |          |           |           |
|----|----------|-----------|-----------|
| 28 | 1.383241 | 0.481928  | 0.536461  |
| 15 | 2.912681 | -0.022335 | -0.906387 |
| 6  | 3.366827 | -1.830185 | -0.780209 |
| 6  | 4.449633 | -2.331419 | -1.754672 |
| 6  | 3.708138 | -2.240123 | 0.667233  |
| 1  | 2.424077 | -2.327597 | -1.039165 |
| 6  | 4.607710 | -3.857883 | -1.648900 |
| 1  | 5.408259 | -1.857009 | -1.507673 |
| 1  | 4.209171 | -2.050834 | -2.785938 |
| 6  | 3.875169 | -3.763418 | 0.776316  |
| 1  | 4.640091 | -1.749733 | 0.980947  |
| 1  | 2.928723 | -1.886884 | 1.347545  |
| 6  | 4.927366 | -4.289657 | -0.210543 |
| 1  | 5.392325 | -4.199192 | -2.334706 |
| 1  | 3.673994 | -4.337247 | -1.974520 |
| 1  | 4.144575 | -4.034870 | 1.803991  |
| 1  | 2.908473 | -4.242892 | 0.566669  |
| 1  | 4.996216 | -5.382093 | -0.148079 |
| 1  | 5.914112 | -3.894954 | 0.071904  |
| 6  | 4.516116 | 0.926380  | -0.660743 |
| 6  | 5.392154 | 1.089377  | -1.921108 |
| 6  | 4.299464 | 2.297687  | 0.016060  |
| 1  | 5.064227 | 0.298833  | 0.056358  |
| 6  | 6.737868 | 1.746449  | -1.572590 |
| 1  | 4.868868 | 1.724528  | -2.646918 |
| 1  | 5.565194 | 0.128318  | -2.413322 |
| 6  | 5.640823 | 2.966090  | 0.354650  |
| 1  | 3.726099 | 2.952165  | -0.654238 |
| 1  | 3.697673 | 2.171311  | 0.919789  |
| 6  | 6.537780 | 3.103173  | -0.883666 |
| 1  | 7.337986 | 1.863969  | -2.482902 |
| 1  | 7.303291 | 1.078768  | -0.906861 |
| 1  | 5.461418 | 3.947619  | 0.809631  |
| 1  | 6.158870 | 2.359687  | 1.111434  |

|    |           |           |           |
|----|-----------|-----------|-----------|
| 1  | 7.505923  | 3.538804  | -0.609335 |
| 1  | 6.068510  | 3.799625  | -1.593520 |
| 6  | 2.410777  | 0.245618  | -2.684617 |
| 6  | 1.338783  | -0.755532 | -3.159549 |
| 6  | 1.898910  | 1.691569  | -2.867996 |
| 1  | 3.307117  | 0.109598  | -3.303047 |
| 6  | 0.950985  | -0.488250 | -4.622728 |
| 1  | 0.445513  | -0.659238 | -2.534671 |
| 1  | 1.693935  | -1.787114 | -3.061033 |
| 6  | 1.513852  | 1.965231  | -4.329372 |
| 1  | 1.018405  | 1.822521  | -2.226433 |
| 1  | 2.650044  | 2.416661  | -2.535907 |
| 6  | 0.471859  | 0.955054  | -4.825405 |
| 1  | 0.161787  | -1.185447 | -4.916709 |
| 1  | 1.821955  | -0.681292 | -5.267001 |
| 1  | 1.134104  | 2.990160  | -4.425581 |
| 1  | 2.415849  | 1.904412  | -4.955531 |
| 1  | 0.240639  | 1.133082  | -5.882570 |
| 1  | -0.463144 | 1.087128  | -4.269009 |
| 7  | 0.036909  | 1.017467  | 1.818454  |
| 6  | -0.174661 | 1.160053  | 3.261465  |
| 6  | -0.331945 | -0.249597 | 3.922440  |
| 6  | 0.909095  | -1.156492 | 3.804518  |
| 6  | -0.864918 | -0.229516 | 5.375912  |
| 1  | -1.118566 | -0.699807 | 3.306884  |
| 6  | 1.972779  | -0.904989 | 4.881911  |
| 1  | 1.340887  | -1.046722 | 2.807201  |
| 1  | 0.572570  | -2.200172 | 3.890154  |
| 6  | 0.197832  | -0.067354 | 6.478975  |
| 1  | -1.640566 | 0.540848  | 5.480808  |
| 1  | -1.370212 | -1.190507 | 5.544848  |
| 6  | 1.371540  | -1.038977 | 6.288151  |
| 1  | 2.397488  | 0.098227  | 4.754686  |
| 1  | 2.800397  | -1.614263 | 4.753139  |
| 1  | -0.273393 | -0.227451 | 7.456855  |
| 1  | 0.585550  | 0.957770  | 6.496170  |
| 1  | 2.135400  | -0.865626 | 7.056111  |
| 1  | 1.013627  | -2.069913 | 6.427109  |
| 16 | -1.192180 | 1.157861  | 0.819349  |
| 8  | -0.529851 | 0.705167  | -0.481933 |
| 8  | -2.447906 | 0.498152  | 1.218835  |
| 6  | 0.845701  | 2.094083  | 3.869789  |
| 6  | 1.724702  | 2.841760  | 3.201873  |
| 1  | 0.796520  | 2.177779  | 4.951967  |
| 1  | 2.398174  | 3.516477  | 3.723728  |
| 1  | 1.794953  | 2.795880  | 2.120952  |
| 1  | -1.150025 | 1.648657  | 3.426302  |
| 7  | -1.933355 | -1.838463 | -1.341006 |
| 1  | -1.296533 | -1.063686 | -1.129257 |
| 6  | -2.484482 | -2.392321 | -0.075570 |
| 6  | -3.327102 | -3.684979 | -0.303842 |
| 6  | -2.627124 | -4.788016 | -1.129996 |
| 6  | -3.929094 | -4.244517 | 1.008702  |
| 1  | -4.173607 | -3.347819 | -0.905924 |
| 6  | -1.737512 | -5.741068 | -0.316547 |
| 1  | -2.059428 | -4.324580 | -1.941092 |
| 1  | -3.415370 | -5.382236 | -1.611781 |



|                                              |              |
|----------------------------------------------|--------------|
| Thermal correction to Energy=                | 1.288310     |
| Thermal correction to Enthalpy=              | 1.289254     |
| Thermal correction to Gibbs Free Energy=     | 1.126826     |
| Sum of electronic and zero-point Energies=   | -3670.975697 |
| Sum of electronic and thermal Energies=      | -3670.913344 |
| Sum of electronic and thermal Enthalpies=    | -3670.912400 |
| Sum of electronic and thermal Free Energies= | -3671.074829 |

.....  
 Cartesian Coordinates  
 .....

|    |          |           |           |
|----|----------|-----------|-----------|
| 28 | 0.291222 | -0.746133 | 0.793717  |
| 15 | 2.419153 | -1.242621 | -0.258470 |
| 6  | 2.802863 | -2.994714 | 0.312873  |
| 6  | 4.076594 | -3.678000 | -0.218796 |
| 6  | 2.760215 | -3.089539 | 1.853781  |
| 1  | 1.948983 | -3.566820 | -0.067658 |
| 6  | 4.127973 | -5.148588 | 0.231690  |
| 1  | 4.961918 | -3.160550 | 0.170266  |
| 1  | 4.126399 | -3.622550 | -1.311701 |
| 6  | 2.819432 | -4.552926 | 2.320812  |
| 1  | 3.616357 | -2.547794 | 2.278431  |
| 1  | 1.860082 | -2.600897 | 2.243743  |
| 6  | 4.056175 | -5.270732 | 1.760693  |
| 1  | 5.042271 | -5.621898 | -0.145942 |
| 1  | 3.284520 | -5.691653 | -0.218001 |
| 1  | 2.815090 | -4.596520 | 3.416542  |
| 1  | 1.913099 | -5.074773 | 1.981152  |
| 1  | 4.052889 | -6.325609 | 2.059845  |
| 1  | 4.959299 | -4.821967 | 2.198952  |
| 6  | 3.963813 | -0.289332 | 0.265987  |
| 6  | 5.194188 | -0.403390 | -0.662843 |
| 6  | 3.687487 | 1.194688  | 0.567612  |
| 1  | 4.224294 | -0.768089 | 1.220771  |
| 6  | 6.425081 | 0.262415  | -0.022517 |
| 1  | 4.977522 | 0.098352  | -1.613121 |
| 1  | 5.423729 | -1.443113 | -0.905443 |
| 6  | 4.907901 | 1.858513  | 1.220626  |
| 1  | 3.456653 | 1.718962  | -0.365705 |
| 1  | 2.808856 | 1.301187  | 1.203869  |
| 6  | 6.153769 | 1.730468  | 0.334710  |
| 1  | 7.282503 | 0.184165  | -0.702222 |
| 1  | 6.696753 | -0.288179 | 0.889828  |
| 1  | 4.687548 | 2.912554  | 1.421875  |
| 1  | 5.099081 | 1.382819  | 2.193804  |
| 1  | 7.029007 | 2.170944  | 0.827894  |
| 1  | 5.990953 | 2.301195  | -0.591067 |
| 6  | 2.521776 | -1.346611 | -2.126973 |
| 6  | 1.496458 | -2.331461 | -2.726006 |
| 6  | 2.356535 | 0.038363  | -2.787245 |
| 1  | 3.526835 | -1.721351 | -2.359284 |
| 6  | 1.658936 | -2.432448 | -4.252024 |
| 1  | 0.481771 | -1.980342 | -2.505452 |
| 1  | 1.601243 | -3.326530 | -2.278709 |
| 6  | 2.522863 | -0.055744 | -4.311823 |
| 1  | 1.362047 | 0.422985  | -2.549064 |
| 1  | 3.073710 | 0.756406  | -2.377419 |
| 6  | 1.529988 | -1.056312 | -4.919480 |

|    |           |           |           |
|----|-----------|-----------|-----------|
| 1  | 0.906768  | -3.121283 | -4.654085 |
| 1  | 2.643610  | -2.865500 | -4.482499 |
| 1  | 2.385053  | 0.937001  | -4.758302 |
| 1  | 3.551608  | -0.366953 | -4.547959 |
| 1  | 1.689258  | -1.143345 | -6.001333 |
| 1  | 0.507749  | -0.687890 | -4.771714 |
| 7  | 0.309706  | 1.155120  | 1.340242  |
| 6  | -0.136177 | 1.666132  | 2.659219  |
| 6  | -1.617011 | 1.209666  | 3.009426  |
| 6  | -1.773685 | 0.086056  | 4.061416  |
| 6  | -2.524975 | 2.402313  | 3.369486  |
| 1  | -1.979652 | 0.811063  | 2.059512  |
| 6  | -1.705102 | 0.544182  | 5.529950  |
| 1  | -1.028803 | -0.700290 | 3.890060  |
| 1  | -2.756885 | -0.375970 | 3.893419  |
| 6  | -2.326924 | 2.891689  | 4.810067  |
| 1  | -2.367243 | 3.207116  | 2.644667  |
| 1  | -3.571438 | 2.083652  | 3.256197  |
| 6  | -2.606212 | 1.756868  | 5.806111  |
| 1  | -0.672710 | 0.798920  | 5.791890  |
| 1  | -1.985908 | -0.292616 | 6.181676  |
| 1  | -2.982701 | 3.747477  | 5.011316  |
| 1  | -1.296955 | 3.254260  | 4.944203  |
| 1  | -2.468870 | 2.101416  | 6.838432  |
| 1  | -3.660213 | 1.457252  | 5.712002  |
| 16 | -0.138291 | 2.039840  | 0.070670  |
| 8  | -0.202499 | 1.103310  | -1.096090 |
| 8  | -1.336414 | 2.873881  | 0.325264  |
| 6  | 0.884536  | 1.361356  | 3.727273  |
| 6  | 1.891229  | 0.488273  | 3.668671  |
| 1  | 0.746485  | 1.936760  | 4.641053  |
| 1  | 2.561671  | 0.350389  | 4.512863  |
| 1  | 2.077550  | -0.114193 | 2.786840  |
| 1  | -0.185101 | 2.760178  | 2.599489  |
| 7  | -1.937403 | -1.126775 | -1.518979 |
| 1  | -1.174442 | -0.442514 | -1.499509 |
| 6  | -2.539012 | -1.211626 | -0.165347 |
| 6  | -3.885466 | -1.998509 | -0.141591 |
| 6  | -3.775716 | -3.492084 | -0.525386 |
| 6  | -4.697045 | -1.786059 | 1.162391  |
| 1  | -4.480481 | -1.521610 | -0.922300 |
| 6  | -3.490955 | -4.445686 | 0.646930  |
| 1  | -3.029035 | -3.606612 | -1.315468 |
| 1  | -4.733760 | -3.782919 | -0.974844 |
| 6  | -4.423356 | -2.781132 | 2.303341  |
| 1  | -4.574702 | -0.753730 | 1.514461  |
| 1  | -5.756813 | -1.886481 | 0.893260  |
| 6  | -4.475879 | -4.231094 | 1.804018  |
| 1  | -2.468587 | -4.303709 | 1.015081  |
| 1  | -3.548048 | -5.480639 | 0.287662  |
| 1  | -5.161690 | -2.623061 | 3.099219  |
| 1  | -3.444204 | -2.594552 | 2.761938  |
| 1  | -4.260953 | -4.924376 | 2.626344  |
| 1  | -5.495452 | -4.457617 | 1.459396  |
| 16 | -2.810667 | -0.787014 | -2.914437 |
| 8  | -1.785179 | -0.335264 | -3.865573 |
| 8  | -3.665525 | -1.933619 | -3.246037 |

|   |           |           |           |
|---|-----------|-----------|-----------|
| 6 | -3.889628 | 0.591571  | -2.517035 |
| 6 | -5.268180 | 0.469065  | -2.688812 |
| 6 | -3.325548 | 1.763986  | -2.007160 |
| 6 | -6.089527 | 1.542792  | -2.342334 |
| 1 | -5.682152 | -0.453291 | -3.081287 |
| 6 | -4.161060 | 2.817130  | -1.652244 |
| 1 | -2.255453 | 1.847130  | -1.871014 |
| 6 | -5.552798 | 2.725559  | -1.815852 |
| 1 | -7.164342 | 1.455891  | -2.477223 |
| 1 | -3.720432 | 3.715854  | -1.230140 |
| 6 | -1.505893 | -1.811769 | 0.774101  |
| 6 | -0.426948 | -2.601904 | 0.366806  |
| 1 | -1.884572 | -1.921926 | 1.782186  |
| 1 | -0.002200 | -3.307066 | 1.076282  |
| 1 | -0.308420 | -2.844862 | -0.681929 |
| 1 | -2.770027 | -0.194195 | 0.183865  |
| 1 | -0.268606 | -0.868765 | 2.067085  |
| 6 | 1.181800  | 3.190047  | -0.354432 |
| 6 | 1.538652  | 3.350771  | -1.692426 |
| 6 | 1.828992  | 3.919972  | 0.645940  |
| 6 | 2.571019  | 4.229515  | -2.025328 |
| 1 | 1.026575  | 2.781269  | -2.458795 |
| 6 | 2.851776  | 4.796346  | 0.297520  |
| 1 | 1.568668  | 3.781746  | 1.689401  |
| 6 | 3.247970  | 4.958522  | -1.040077 |
| 1 | 2.856209  | 4.343088  | -3.067970 |
| 1 | 3.362381  | 5.356365  | 1.076852  |
| 6 | -6.439944 | 3.880466  | -1.421832 |
| 1 | -6.163357 | 4.792707  | -1.962823 |
| 1 | -7.493252 | 3.672296  | -1.629712 |
| 1 | -6.344944 | 4.102295  | -0.352401 |
| 6 | 4.395520  | 5.872956  | -1.390195 |
| 1 | 4.321871  | 6.828533  | -0.860140 |
| 1 | 5.354312  | 5.421145  | -1.106632 |
| 1 | 4.432857  | 6.082051  | -2.463025 |

-----  
**6**  
-----

Number of imaginary frequencies : 0  
The smallest frequencies are : 18.7983 20.2939 25.2825 cm(-1)

Electronic energy : HF=-3672.2533301  
Zero-point correction= 1.231627  
(Hartree/Particle)  
Thermal correction to Energy= 1.293652  
Thermal correction to Enthalpy= 1.294596  
Thermal correction to Gibbs Free Energy= 1.134544  
Sum of electronic and zero-point Energies= -3671.021703  
Sum of electronic and thermal Energies= -3670.959678  
Sum of electronic and thermal Enthalpies= -3670.958734  
Sum of electronic and thermal Free Energies= -3671.118786

.....  
Cartesian Coordinates  
.....

|    |           |           |           |
|----|-----------|-----------|-----------|
| 28 | -0.890899 | 0.521830  | 0.338424  |
| 15 | -2.076793 | -0.082172 | -1.392197 |
| 6  | -2.668922 | 1.418706  | -2.334529 |

|   |           |           |           |
|---|-----------|-----------|-----------|
| 6 | -3.570426 | 1.154219  | -3.555253 |
| 6 | -3.322470 | 2.457632  | -1.398314 |
| 1 | -1.731565 | 1.858042  | -2.698322 |
| 6 | -3.850335 | 2.462762  | -4.313937 |
| 1 | -4.524848 | 0.730821  | -3.217797 |
| 1 | -3.114779 | 0.421662  | -4.229802 |
| 6 | -3.611282 | 3.765468  | -2.151668 |
| 1 | -4.266195 | 2.057312  | -1.003381 |
| 1 | -2.680429 | 2.649615  | -0.533114 |
| 6 | -4.478771 | 3.519728  | -3.394662 |
| 1 | -4.505046 | 2.262571  | -5.170509 |
| 1 | -2.906057 | 2.849134  | -4.722576 |
| 1 | -4.098600 | 4.481281  | -1.479290 |
| 1 | -2.657554 | 4.218388  | -2.457482 |
| 1 | -4.634592 | 4.456535  | -3.942454 |
| 1 | -5.472267 | 3.172255  | -3.076127 |
| 6 | -3.634025 | -0.967161 | -0.803090 |
| 6 | -4.325273 | -1.881066 | -1.839267 |
| 6 | -3.419141 | -1.744770 | 0.514385  |
| 1 | -4.317413 | -0.134659 | -0.583132 |
| 6 | -5.663301 | -2.407666 | -1.291907 |
| 1 | -3.674582 | -2.735867 | -2.058323 |
| 1 | -4.492709 | -1.360619 | -2.786185 |
| 6 | -4.753741 | -2.266600 | 1.063545  |
| 1 | -2.748287 | -2.592559 | 0.339215  |
| 1 | -2.929164 | -1.120426 | 1.263705  |
| 6 | -5.474556 | -3.150559 | 0.037904  |
| 1 | -6.132513 | -3.062748 | -2.035840 |
| 1 | -6.348403 | -1.561049 | -1.140856 |
| 1 | -4.572040 | -2.822856 | 1.989200  |
| 1 | -5.393880 | -1.412411 | 1.327561  |
| 1 | -6.443245 | -3.484949 | 0.428373  |
| 1 | -4.874527 | -4.055295 | -0.137960 |
| 6 | -1.323929 | -1.211537 | -2.672411 |
| 6 | -0.237333 | -0.557779 | -3.547206 |
| 6 | -0.750217 | -2.483206 | -2.017208 |
| 1 | -2.156133 | -1.498279 | -3.328847 |
| 6 | 0.219370  | -1.534279 | -4.643743 |
| 1 | 0.619340  | -0.311276 | -2.913111 |
| 1 | -0.593163 | 0.373206  | -4.003280 |
| 6 | -0.271098 | -3.479170 | -3.085268 |
| 1 | 0.094401  | -2.198111 | -1.383061 |
| 1 | -1.486413 | -2.964588 | -1.367521 |
| 6 | 0.746755  | -2.845316 | -4.043792 |
| 1 | 0.997692  | -1.059814 | -5.252871 |
| 1 | -0.626443 | -1.743398 | -5.315570 |
| 1 | 0.171862  | -4.353801 | -2.594908 |
| 1 | -1.141306 | -3.839761 | -3.654361 |
| 1 | 1.001129  | -3.550885 | -4.844265 |
| 1 | 1.671849  | -2.638001 | -3.497067 |
| 7 | -0.773289 | 0.387540  | 2.240320  |
| 6 | -1.294950 | 1.276766  | 3.309064  |
| 6 | -0.379381 | 2.547683  | 3.449947  |
| 6 | -0.548377 | 3.582932  | 2.316935  |
| 6 | -0.427372 | 3.221173  | 4.841919  |
| 1 | 0.626665  | 2.124850  | 3.356025  |
| 6 | -1.658897 | 4.623500  | 2.543065  |

|    |           |           |           |
|----|-----------|-----------|-----------|
| 1  | -0.721876 | 3.056862  | 1.374618  |
| 1  | 0.404931  | 4.116421  | 2.200612  |
| 6  | -1.548111 | 4.254434  | 5.037625  |
| 1  | -0.468428 | 2.452363  | 5.623694  |
| 1  | 0.529184  | 3.743675  | 4.981447  |
| 6  | -1.535914 | 5.300493  | 3.914478  |
| 1  | -2.638749 | 4.140175  | 2.467788  |
| 1  | -1.617155 | 5.373678  | 1.742733  |
| 1  | -1.427469 | 4.740345  | 6.013708  |
| 1  | -2.528690 | 3.762906  | 5.059912  |
| 1  | -2.345350 | 6.026929  | 4.057021  |
| 1  | -0.593551 | 5.866141  | 3.959830  |
| 16 | 0.296176  | -0.753761 | 2.773059  |
| 8  | 1.508184  | -0.724581 | 1.906551  |
| 8  | 0.520531  | -0.660981 | 4.231022  |
| 6  | -2.764109 | 1.593356  | 3.180630  |
| 6  | -3.573613 | 1.438930  | 2.133575  |
| 1  | -3.181681 | 2.022000  | 4.090079  |
| 1  | -4.619896 | 1.728392  | 2.181837  |
| 1  | -3.220845 | 1.040012  | 1.192001  |
| 1  | -1.188215 | 0.752231  | 4.265145  |
| 7  | 2.224386  | -0.228591 | -0.798870 |
| 1  | 1.709397  | -0.546780 | 0.028762  |
| 6  | 2.735285  | 1.146725  | -0.537973 |
| 6  | 3.540583  | 1.718568  | -1.734856 |
| 6  | 2.791115  | 1.882905  | -3.075359 |
| 6  | 4.327606  | 3.004870  | -1.369514 |
| 1  | 4.307002  | 0.960144  | -1.916887 |
| 6  | 2.043985  | 3.215723  | -3.240510 |
| 1  | 2.124448  | 1.032076  | -3.227492 |
| 1  | 3.539609  | 1.819385  | -3.876733 |
| 6  | 3.586967  | 4.335375  | -1.590943 |
| 1  | 4.689762  | 2.939384  | -0.335534 |
| 1  | 5.225226  | 3.023433  | -2.002407 |
| 6  | 2.975945  | 4.409955  | -2.996297 |
| 1  | 1.202582  | 3.275456  | -2.540796 |
| 1  | 1.613325  | 3.266972  | -4.248677 |
| 1  | 4.286126  | 5.165908  | -1.432766 |
| 1  | 2.789437  | 4.464235  | -0.849097 |
| 1  | 2.434402  | 5.354956  | -3.127049 |
| 1  | 3.782059  | 4.401339  | -3.744679 |
| 16 | 3.226254  | -1.491280 | -1.239562 |
| 8  | 2.466420  | -2.704672 | -0.885075 |
| 8  | 3.665516  | -1.296260 | -2.628984 |
| 6  | 4.682523  | -1.406719 | -0.194604 |
| 6  | 5.931052  | -1.166163 | -0.766268 |
| 6  | 4.535110  | -1.563178 | 1.187828  |
| 6  | 7.051328  | -1.087083 | 0.061983  |
| 1  | 6.016459  | -1.052944 | -1.841361 |
| 6  | 5.663732  | -1.474269 | 1.996235  |
| 1  | 3.556548  | -1.734433 | 1.623235  |
| 6  | 6.935830  | -1.235077 | 1.450099  |
| 1  | 8.028057  | -0.906772 | -0.378854 |
| 1  | 5.556156  | -1.590069 | 3.071527  |
| 6  | 1.520785  | 1.942739  | -0.003870 |
| 6  | 0.183702  | 1.703282  | -0.727209 |
| 1  | 1.770893  | 3.006711  | -0.029569 |



|   |           |           |           |
|---|-----------|-----------|-----------|
| 1 | -0.415660 | 2.622609  | -0.759101 |
| 1 | 0.342604  | 1.372279  | -1.751236 |
| 1 | 3.458090  | 1.095155  | 0.290185  |
| 1 | 1.416122  | 1.694954  | 1.056567  |
| 6 | -0.479054 | -2.344230 | 2.455399  |
| 6 | -0.025833 | -3.147140 | 1.410169  |
| 6 | -1.542733 | -2.748980 | 3.265390  |
| 6 | -0.671217 | -4.359644 | 1.160898  |
| 1 | 0.815178  | -2.837014 | 0.800717  |
| 6 | -2.170505 | -3.963626 | 3.005207  |
| 1 | -1.873268 | -2.120890 | 4.086253  |
| 6 | -1.752662 | -4.783529 | 1.943922  |
| 1 | -0.323632 | -4.982809 | 0.341204  |
| 1 | -2.999692 | -4.281045 | 3.632181  |
| 6 | 8.139214  | -1.117807 | 2.352123  |
| 1 | 8.118972  | -0.171627 | 2.906972  |
| 1 | 8.159980  | -1.923730 | 3.093492  |
| 1 | 9.074827  | -1.150915 | 1.786638  |
| 6 | -2.436230 | -6.100785 | 1.671109  |
| 1 | -1.951990 | -6.916451 | 2.222799  |
| 1 | -3.486864 | -6.078888 | 1.977028  |
| 1 | -2.396500 | -6.359269 | 0.608406  |

---

**5a.log**

---

Number of imaginary frequencies : 0  
The smallest frequencies are : 11.3684     18.8344     21.9178     cm(-1)

|                                              |                 |              |
|----------------------------------------------|-----------------|--------------|
| Electronic energy :                          | HF=-2445.231159 |              |
| Zero-point correction=                       |                 | 0.855579     |
| (Hartree/Particle)                           |                 |              |
| Thermal correction to Energy=                |                 | 0.896988     |
| Thermal correction to Enthalpy=              |                 | 0.897933     |
| Thermal correction to Gibbs Free Energy=     |                 | 0.780594     |
| Sum of electronic and zero-point Energies=   |                 | -2444.375580 |
| Sum of electronic and thermal Energies=      |                 | -2444.334171 |
| Sum of electronic and thermal Enthalpies=    |                 | -2444.333226 |
| Sum of electronic and thermal Free Energies= |                 | -2444.450565 |

.....  
Cartesian Coordinates  
.....

|    |          |           |           |
|----|----------|-----------|-----------|
| 28 | 0.473290 | 0.811711  | -0.955735 |
| 15 | 2.237717 | -0.058779 | 0.045961  |
| 6  | 2.829452 | 1.381830  | 1.132000  |
| 6  | 3.700843 | 1.033682  | 2.358355  |
| 6  | 3.509236 | 2.496898  | 0.308836  |
| 1  | 1.879895 | 1.787893  | 1.509126  |
| 6  | 3.976459 | 2.284281  | 3.212434  |
| 1  | 4.655023 | 0.605679  | 2.026556  |
| 1  | 3.217153 | 0.280273  | 2.984916  |
| 6  | 3.768765 | 3.746094  | 1.164873  |
| 1  | 4.470186 | 2.128589  | -0.074631 |
| 1  | 2.897432 | 2.756889  | -0.559854 |
| 6  | 4.621206 | 3.409978  | 2.394251  |
| 1  | 4.613198 | 2.013677  | 4.063263  |
| 1  | 3.026045 | 2.642210  | 3.633371  |
| 1  | 4.258259 | 4.515674  | 0.556039  |

|    |           |           |           |
|----|-----------|-----------|-----------|
| 1  | 2.806540  | 4.166427  | 1.490691  |
| 1  | 4.767285  | 4.300414  | 3.017272  |
| 1  | 5.619235  | 3.089209  | 2.062577  |
| 6  | 3.606395  | -0.416495 | -1.170376 |
| 6  | 4.915077  | -0.985910 | -0.591330 |
| 6  | 3.077983  | -1.260574 | -2.352255 |
| 1  | 3.828232  | 0.579011  | -1.576369 |
| 6  | 5.973278  | -1.156931 | -1.695094 |
| 1  | 4.728569  | -1.956634 | -0.117909 |
| 1  | 5.302675  | -0.325505 | 0.191504  |
| 6  | 4.153659  | -1.417561 | -3.436580 |
| 1  | 2.772502  | -2.252222 | -2.002597 |
| 1  | 2.179553  | -0.786834 | -2.766141 |
| 6  | 5.447272  | -2.009458 | -2.858949 |
| 1  | 6.881532  | -1.602319 | -1.271214 |
| 1  | 6.257040  | -0.165058 | -2.075348 |
| 1  | 3.772208  | -2.048156 | -4.248062 |
| 1  | 4.371046  | -0.433688 | -3.876952 |
| 1  | 6.211307  | -2.095797 | -3.640762 |
| 1  | 5.247709  | -3.028943 | -2.498812 |
| 6  | 2.133848  | -1.486985 | 1.251163  |
| 6  | 0.933189  | -1.240470 | 2.194807  |
| 6  | 2.076160  | -2.880734 | 0.590642  |
| 1  | 3.059625  | -1.446551 | 1.840663  |
| 6  | 0.771935  | -2.372097 | 3.220624  |
| 1  | 0.027650  | -1.166456 | 1.587918  |
| 1  | 1.049758  | -0.282224 | 2.716853  |
| 6  | 1.897715  | -3.985213 | 1.645936  |
| 1  | 1.245256  | -2.917581 | -0.114411 |
| 1  | 2.997824  | -3.070206 | 0.032888  |
| 6  | 0.666479  | -3.736355 | 2.526523  |
| 1  | -0.116278 | -2.182193 | 3.836355  |
| 1  | 1.633446  | -2.377226 | 3.905187  |
| 1  | 1.818536  | -4.956078 | 1.142196  |
| 1  | 2.794077  | -4.032716 | 2.282867  |
| 1  | 0.560438  | -4.536323 | 3.269731  |
| 1  | -0.230492 | -3.750306 | 1.895503  |
| 7  | -1.300140 | 0.083013  | -0.426484 |
| 6  | -2.161955 | 1.133808  | -1.059261 |
| 6  | -3.266020 | 1.657046  | -0.094649 |
| 6  | -2.846380 | 2.639501  | 1.022755  |
| 6  | -4.505436 | 2.191574  | -0.847804 |
| 1  | -3.583577 | 0.740795  | 0.410496  |
| 6  | -2.810509 | 4.126757  | 0.617774  |
| 1  | -1.887482 | 2.325207  | 1.452512  |
| 1  | -3.582234 | 2.536280  | 1.832027  |
| 6  | -4.363170 | 3.646866  | -1.311871 |
| 1  | -4.737294 | 1.533004  | -1.693720 |
| 1  | -5.368213 | 2.131362  | -0.169683 |
| 6  | -4.089918 | 4.561758  | -0.110215 |
| 1  | -1.962958 | 4.324918  | -0.045115 |
| 1  | -2.653732 | 4.740859  | 1.513724  |
| 1  | -5.271173 | 3.964304  | -1.838820 |
| 1  | -3.536422 | 3.732526  | -2.031615 |
| 1  | -4.004109 | 5.607750  | -0.429328 |
| 1  | -4.945225 | 4.511714  | 0.579317  |
| 16 | -1.683952 | -1.426473 | -0.950067 |

|   |           |           |           |
|---|-----------|-----------|-----------|
| 8 | -1.804458 | -1.514540 | -2.425981 |
| 8 | -0.794635 | -2.394452 | -0.276019 |
| 6 | -3.337762 | -1.723297 | -0.297471 |
| 6 | -3.498125 | -1.945983 | 1.073354  |
| 6 | -4.442473 | -1.672765 | -1.144325 |
| 6 | -4.779034 | -2.107187 | 1.591328  |
| 1 | -2.627319 | -1.984789 | 1.719391  |
| 6 | -5.722468 | -1.834801 | -0.609759 |
| 1 | -4.293134 | -1.510954 | -2.206223 |
| 6 | -5.911427 | -2.050415 | 0.760528  |
| 1 | -4.908018 | -2.279311 | 2.657152  |
| 1 | -6.585423 | -1.792644 | -1.269266 |
| 6 | -1.118681 | 2.066755  | -1.660348 |
| 6 | -0.203185 | 2.804346  | -0.955034 |
| 1 | -1.093386 | 2.126328  | -2.747397 |
| 1 | -2.693035 | 0.708048  | -1.917002 |
| 1 | 1.625707  | 1.445660  | -1.542070 |
| 1 | -0.251237 | 2.926202  | 0.122635  |
| 1 | 0.469191  | 3.477361  | -1.476546 |
| 6 | -7.291366 | -2.250862 | 1.337616  |
| 1 | -7.481548 | -3.312850 | 1.537604  |
| 1 | -7.408519 | -1.718920 | 2.287812  |
| 1 | -8.070505 | -1.900100 | 0.654457  |

-----  
**TS [5a-8]**  
 -----

Number of imaginary frequencies : 1  
 The smallest frequencies are : -626.0827 14.7313 22.1141 cm(-1)

Electronic energy : HF=-2445.1998594  
 Zero-point correction= 0.852225  
 (Hartree/Particle)  
 Thermal correction to Energy= 0.893664  
 Thermal correction to Enthalpy= 0.894608  
 Thermal correction to Gibbs Free Energy= 0.776936  
 Sum of electronic and zero-point Energies= -2444.347634  
 Sum of electronic and thermal Energies= -2444.306195  
 Sum of electronic and thermal Enthalpies= -2444.305251  
 Sum of electronic and thermal Free Energies= -2444.422923

.....  
 Cartesian Coordinates  
 .....

|    |          |           |           |
|----|----------|-----------|-----------|
| 28 | 0.064899 | 0.229954  | -0.771836 |
| 15 | 2.233476 | -0.176711 | -0.083052 |
| 6  | 3.270625 | 1.385146  | -0.182710 |
| 6  | 4.585607 | 1.454434  | 0.618708  |
| 6  | 3.516612 | 1.801312  | -1.647609 |
| 1  | 2.591752 | 2.132340  | 0.249233  |
| 6  | 5.184700 | 2.870511  | 0.544818  |
| 1  | 5.309630 | 0.738175  | 0.211940  |
| 1  | 4.423339 | 1.180266  | 1.665977  |
| 6  | 4.106373 | 3.218150  | -1.725190 |
| 1  | 4.225226 | 1.101554  | -2.110037 |
| 1  | 2.586558 | 1.737950  | -2.224354 |
| 6  | 5.401619 | 3.323808  | -0.906280 |
| 1  | 6.130283 | 2.903310  | 1.099264  |

|   |           |           |           |
|---|-----------|-----------|-----------|
| 1 | 4.502740  | 3.572135  | 1.046171  |
| 1 | 4.292136  | 3.489811  | -2.771194 |
| 1 | 3.370269  | 3.936994  | -1.338212 |
| 1 | 5.786437  | 4.350237  | -0.930716 |
| 1 | 6.170278  | 2.688817  | -1.369918 |
| 6 | 3.076405  | -1.449663 | -1.167711 |
| 6 | 4.393185  | -2.038805 | -0.622373 |
| 6 | 2.091077  | -2.563006 | -1.592763 |
| 1 | 3.313992  | -0.879738 | -2.076625 |
| 6 | 5.026663  | -3.009851 | -1.633057 |
| 1 | 4.197935  | -2.575112 | 0.314137  |
| 1 | 5.102628  | -1.240939 | -0.383303 |
| 6 | 2.744414  | -3.525730 | -2.595632 |
| 1 | 1.757545  | -3.124769 | -0.714118 |
| 1 | 1.188385  | -2.115730 | -2.021873 |
| 6 | 4.047222  | -4.118632 | -2.041128 |
| 1 | 5.941233  | -3.441342 | -1.208179 |
| 1 | 5.330591  | -2.448655 | -2.528538 |
| 1 | 2.039069  | -4.324466 | -2.854146 |
| 1 | 2.962921  | -2.984060 | -3.527716 |
| 1 | 4.511669  | -4.782536 | -2.780123 |
| 1 | 3.816386  | -4.737626 | -1.162444 |
| 6 | 2.373725  | -0.718012 | 1.698062  |
| 6 | 1.647981  | 0.330677  | 2.574312  |
| 6 | 1.785709  | -2.126794 | 1.927766  |
| 1 | 3.437793  | -0.735946 | 1.969203  |
| 6 | 1.654264  | -0.064228 | 4.058753  |
| 1 | 0.608213  | 0.419274  | 2.231775  |
| 1 | 2.110840  | 1.317973  | 2.452482  |
| 6 | 1.788224  | -2.499867 | 3.418913  |
| 1 | 0.759830  | -2.161757 | 1.553401  |
| 1 | 2.359400  | -2.871016 | 1.367206  |
| 6 | 1.042772  | -1.456410 | 4.260975  |
| 1 | 1.103406  | 0.686454  | 4.638150  |
| 1 | 2.688736  | -0.058106 | 4.433534  |
| 1 | 1.329540  | -3.487985 | 3.543340  |
| 1 | 2.826402  | -2.584395 | 3.774608  |
| 1 | 1.067945  | -1.733104 | 5.322285  |
| 1 | -0.008001 | -1.437019 | 3.948292  |
| 7 | -1.848243 | 0.463526  | 0.883647  |
| 6 | -2.390452 | 1.246939  | -0.254387 |
| 6 | -3.354675 | 2.332461  | 0.310476  |
| 6 | -2.725854 | 3.331900  | 1.306814  |
| 6 | -4.174613 | 3.059266  | -0.780015 |
| 1 | -4.059079 | 1.719237  | 0.887268  |
| 6 | -2.070175 | 4.567319  | 0.666338  |
| 1 | -2.015408 | 2.797944  | 1.946510  |
| 1 | -3.529438 | 3.685692  | 1.967759  |
| 6 | -3.472807 | 4.274684  | -1.407817 |
| 1 | -4.475821 | 2.345179  | -1.557919 |
| 1 | -5.105254 | 3.415088  | -0.316933 |
| 6 | -3.012498 | 5.261398  | -0.326285 |
| 1 | -1.156202 | 4.280770  | 0.135482  |
| 1 | -1.765298 | 5.265655  | 1.455974  |
| 1 | -4.153430 | 4.766994  | -2.113392 |
| 1 | -2.600254 | 3.954078  | -1.991239 |
| 1 | -2.518114 | 6.128192  | -0.782325 |

|    |           |           |           |
|----|-----------|-----------|-----------|
| 1  | -3.892397 | 5.645828  | 0.210436  |
| 16 | -1.829527 | -1.106731 | 0.707629  |
| 8  | -0.838494 | -1.535873 | -0.403304 |
| 8  | -1.572567 | -1.780226 | 1.994247  |
| 6  | -3.416947 | -1.698756 | 0.092194  |
| 6  | -4.513522 | -1.645773 | 0.959416  |
| 6  | -3.569508 | -2.131100 | -1.223933 |
| 6  | -5.765322 | -2.038309 | 0.498283  |
| 1  | -4.379474 | -1.309765 | 1.982686  |
| 6  | -4.834023 | -2.521235 | -1.671841 |
| 1  | -2.704866 | -2.166083 | -1.877379 |
| 6  | -5.946911 | -2.479504 | -0.823599 |
| 1  | -6.618533 | -2.005067 | 1.171377  |
| 1  | -4.954585 | -2.861595 | -2.697044 |
| 6  | -1.259218 | 1.706190  | -1.166725 |
| 6  | 0.001861  | 2.180941  | -0.716987 |
| 1  | -1.548816 | 1.939661  | -2.188533 |
| 1  | -3.032221 | 0.621973  | -0.892750 |
| 1  | -0.407486 | 0.240853  | -2.117664 |
| 1  | 0.161086  | 2.398947  | 0.336665  |
| 1  | 0.620357  | 2.749211  | -1.406969 |
| 6  | -7.314021 | -2.906285 | -1.299211 |
| 1  | -7.314405 | -3.147870 | -2.365806 |
| 1  | -7.660341 | -3.793331 | -0.755527 |
| 1  | -8.056758 | -2.117866 | -1.131587 |

-----  
7  
-----

Number of imaginary frequencies : 0  
The smallest frequencies are : 14.4109 20.2805 24.0845 cm(-1)

Electronic energy : HF=-3672.239434  
Zero-point correction= 1.229572  
(Hartree/Particle)  
Thermal correction to Energy= 1.291173  
Thermal correction to Enthalpy= 1.292117  
Thermal correction to Gibbs Free Energy= 1.132378  
Sum of electronic and zero-point Energies= -3671.009862  
Sum of electronic and thermal Energies= -3670.948261  
Sum of electronic and thermal Enthalpies= -3670.947317  
Sum of electronic and thermal Free Energies= -3671.107056

.....  
Cartesian Coordinates  
.....

|    |          |           |           |
|----|----------|-----------|-----------|
| 28 | 1.461017 | -0.159653 | 0.226047  |
| 15 | 3.541076 | 0.375245  | -0.229124 |
| 6  | 3.974633 | 2.090622  | 0.359924  |
| 6  | 5.417481 | 2.578065  | 0.137671  |
| 6  | 2.962010 | 3.116168  | -0.190129 |
| 1  | 3.807921 | 2.031710  | 1.441991  |
| 6  | 5.623701 | 3.950086  | 0.803393  |
| 1  | 5.611609 | 2.672664  | -0.937988 |
| 1  | 6.140918 | 1.855593  | 0.532893  |
| 6  | 3.166553 | 4.490431  | 0.463442  |
| 1  | 3.088108 | 3.215605  | -1.277399 |
| 1  | 1.943984 | 2.755293  | -0.024373 |

|   |           |           |           |
|---|-----------|-----------|-----------|
| 6 | 4.610681  | 4.984474  | 0.289517  |
| 1 | 6.648137  | 4.298639  | 0.626860  |
| 1 | 5.511546  | 3.840270  | 1.891391  |
| 1 | 2.460301  | 5.213536  | 0.038501  |
| 1 | 2.931217  | 4.413395  | 1.534098  |
| 1 | 4.751524  | 5.941581  | 0.805232  |
| 1 | 4.799799  | 5.170931  | -0.777379 |
| 6 | 3.994578  | 0.360300  | -2.057306 |
| 6 | 5.487745  | 0.102394  | -2.360108 |
| 6 | 3.119310  | -0.585688 | -2.907689 |
| 1 | 3.762156  | 1.387992  | -2.371427 |
| 6 | 5.780402  | 0.298958  | -3.857030 |
| 1 | 5.738289  | -0.929789 | -2.085321 |
| 1 | 6.134868  | 0.752846  | -1.765880 |
| 6 | 3.412031  | -0.402021 | -4.404750 |
| 1 | 3.313187  | -1.625697 | -2.621418 |
| 1 | 2.061355  | -0.418319 | -2.709848 |
| 6 | 4.898454  | -0.609773 | -4.723799 |
| 1 | 6.841911  | 0.105510  | -4.053301 |
| 1 | 5.596766  | 1.349578  | -4.124447 |
| 1 | 2.793620  | -1.094629 | -4.987213 |
| 1 | 3.114572  | 0.613060  | -4.706186 |
| 1 | 5.092199  | -0.427168 | -5.787395 |
| 1 | 5.165411  | -1.658580 | -4.529861 |
| 6 | 4.729268  | -0.802465 | 0.601381  |
| 6 | 4.764011  | -0.642134 | 2.134592  |
| 6 | 4.362249  | -2.256240 | 0.226901  |
| 1 | 5.731496  | -0.578559 | 0.215065  |
| 6 | 5.744614  | -1.641623 | 2.768563  |
| 1 | 3.761995  | -0.826448 | 2.537250  |
| 1 | 5.042004  | 0.380359  | 2.413703  |
| 6 | 5.324227  | -3.263482 | 0.874755  |
| 1 | 3.335979  | -2.459214 | 0.556846  |
| 1 | 4.367775  | -2.389190 | -0.859411 |
| 6 | 5.382756  | -3.086339 | 2.397534  |
| 1 | 5.746684  | -1.513898 | 3.857594  |
| 1 | 6.764465  | -1.419354 | 2.422866  |
| 1 | 5.012035  | -4.282727 | 0.619404  |
| 1 | 6.331352  | -3.126419 | 0.454876  |
| 1 | 6.103748  | -3.785709 | 2.837165  |
| 1 | 4.400565  | -3.331344 | 2.825199  |
| 7 | -2.242445 | 0.575190  | -0.327409 |
| 6 | -2.001692 | 1.979347  | -0.717790 |
| 6 | -2.533215 | 2.934863  | 0.398116  |
| 6 | -1.738943 | 2.919403  | 1.720732  |
| 6 | -2.801895 | 4.388964  | -0.063321 |
| 1 | -3.514207 | 2.503073  | 0.618390  |
| 6 | -0.527502 | 3.865403  | 1.753545  |
| 1 | -1.432191 | 1.893409  | 1.940313  |
| 1 | -2.420000 | 3.216170  | 2.530836  |
| 6 | -1.595072 | 5.340283  | -0.004318 |
| 1 | -3.237181 | 4.383973  | -1.070624 |
| 1 | -3.577002 | 4.801339  | 0.597995  |
| 6 | -0.922999 | 5.300037  | 1.375807  |
| 1 | 0.244153  | 3.513155  | 1.060949  |
| 1 | -0.072806 | 3.846716  | 2.752317  |
| 1 | -1.924060 | 6.361263  | -0.235550 |

|    |           |           |           |
|----|-----------|-----------|-----------|
| 1  | -0.858761 | 5.080002  | -0.774777 |
| 1  | -0.045287 | 5.957975  | 1.395371  |
| 1  | -1.624725 | 5.689177  | 2.127926  |
| 16 | -3.321456 | -0.186132 | -1.240458 |
| 8  | -2.940216 | -0.265491 | -2.680311 |
| 8  | -3.649472 | -1.467794 | -0.571927 |
| 6  | -0.584660 | 2.206850  | -1.196908 |
| 6  | 0.170178  | 1.286147  | -1.804036 |
| 1  | -0.195546 | 3.216016  | -1.102403 |
| 1  | 1.143639  | 1.544978  | -2.206409 |
| 1  | -0.200892 | 0.282288  | -1.980428 |
| 1  | -2.612789 | 2.240371  | -1.598019 |
| 7  | -0.324380 | -1.024792 | 0.754734  |
| 1  | -1.115490 | -0.488062 | 0.201565  |
| 6  | -0.555973 | -0.883352 | 2.240782  |
| 6  | -1.284902 | -2.059169 | 2.925935  |
| 6  | -1.385937 | -1.853862 | 4.455525  |
| 6  | -2.704112 | -2.274620 | 2.357084  |
| 1  | -0.686651 | -2.960232 | 2.756564  |
| 6  | -2.317876 | -0.693397 | 4.838327  |
| 1  | -0.394728 | -1.722463 | 4.901469  |
| 1  | -1.791506 | -2.780408 | 4.884402  |
| 6  | -3.675191 | -1.145688 | 2.736843  |
| 1  | -2.693067 | -2.366984 | 1.271067  |
| 1  | -3.084092 | -3.226151 | 2.755152  |
| 6  | -3.723121 | -0.905318 | 4.253237  |
| 1  | -1.906421 | 0.256723  | 4.470311  |
| 1  | -2.369107 | -0.602566 | 5.930383  |
| 1  | -4.672873 | -1.396912 | 2.359667  |
| 1  | -3.378963 | -0.227280 | 2.215431  |
| 1  | -4.366324 | -0.047419 | 4.486008  |
| 1  | -4.177607 | -1.779809 | 4.741886  |
| 16 | 0.216269  | -2.478895 | 0.028527  |
| 8  | 0.960128  | -1.893016 | -1.134843 |
| 8  | 0.955470  | -3.265380 | 1.026827  |
| 6  | -1.078329 | -3.481463 | -0.645812 |
| 6  | -1.486266 | -4.615542 | 0.061513  |
| 6  | -1.652757 | -3.127894 | -1.868299 |
| 6  | -2.492444 | -5.409364 | -0.478756 |
| 1  | -1.014998 | -4.871828 | 1.003315  |
| 6  | -2.652395 | -3.940214 | -2.389089 |
| 1  | -1.354749 | -2.226924 | -2.389531 |
| 6  | -3.090222 | -5.083103 | -1.706069 |
| 1  | -2.818428 | -6.295212 | 0.058857  |
| 1  | -3.119742 | -3.660851 | -3.328304 |
| 6  | 0.783611  | -0.466038 | 2.855836  |
| 6  | 1.452911  | 0.598753  | 1.980019  |
| 1  | 0.619931  | -0.073556 | 3.868632  |
| 1  | 0.818901  | 1.487786  | 1.881032  |
| 1  | 2.405477  | 0.911651  | 2.412473  |
| 1  | -1.216963 | -0.013705 | 2.259506  |
| 6  | -4.840557 | 0.801226  | -1.222498 |
| 6  | -5.192403 | 1.575118  | -2.328652 |
| 6  | -5.620630 | 0.831758  | -0.064137 |
| 6  | -6.321119 | 2.393378  | -2.266730 |
| 1  | -4.581069 | 1.524698  | -3.223233 |
| 6  | -6.748549 | 1.648292  | -0.016432 |

|   |           |           |           |
|---|-----------|-----------|-----------|
| 1 | -5.339137 | 0.222148  | 0.787121  |
| 6 | -7.114908 | 2.444161  | -1.112956 |
| 1 | -6.590420 | 3.000497  | -3.127930 |
| 1 | -7.354554 | 1.672274  | 0.886175  |
| 1 | 1.425508  | -1.349716 | 2.953783  |
| 6 | -8.348743 | 3.312718  | -1.062180 |
| 1 | -8.215310 | 4.233548  | -1.639044 |
| 1 | -9.217314 | 2.790201  | -1.483188 |
| 1 | -8.603826 | 3.590453  | -0.034776 |
| 6 | -4.209097 | -5.920412 | -2.271144 |
| 1 | -5.169894 | -5.405198 | -2.150592 |
| 1 | -4.071562 | -6.097796 | -3.342934 |
| 1 | -4.285369 | -6.889614 | -1.770258 |

-----  
**8**  
-----

Number of imaginary frequencies : 0  
The smallest frequencies are : 10.6226 17.7570 29.4359 cm(-1)

Electronic energy : HF=-2445.2851124  
Zero-point correction= 0.859671  
(Hartree/Particle)  
Thermal correction to Energy= 0.900203  
Thermal correction to Enthalpy= 0.901147  
Thermal correction to Gibbs Free Energy= 0.786156  
Sum of electronic and zero-point Energies= -2444.425442  
Sum of electronic and thermal Energies= -2444.384910  
Sum of electronic and thermal Enthalpies= -2444.383965  
Sum of electronic and thermal Free Energies= -2444.498956

.....  
Cartesian Coordinates  
.....

|    |          |           |           |
|----|----------|-----------|-----------|
| 28 | 0.140626 | -0.463128 | -0.194199 |
| 15 | 2.288112 | -0.056301 | 0.168250  |
| 6  | 2.820797 | -0.165778 | 1.954498  |
| 6  | 4.336789 | -0.102158 | 2.218073  |
| 6  | 2.076789 | 0.879818  | 2.812773  |
| 1  | 2.461902 | -1.152775 | 2.269296  |
| 6  | 4.638540 | -0.306245 | 3.712640  |
| 1  | 4.720559 | 0.878785  | 1.909696  |
| 1  | 4.868456 | -0.853417 | 1.623398  |
| 6  | 2.378061 | 0.678445  | 4.305961  |
| 1  | 2.392709 | 1.890882  | 2.520813  |
| 1  | 0.999955 | 0.819799  | 2.627545  |
| 6  | 3.888353 | 0.713385  | 4.581853  |
| 1  | 5.718847 | -0.236006 | 3.887444  |
| 1  | 4.337892 | -1.322799 | 4.003310  |
| 1  | 1.863800 | 1.445567  | 4.897174  |
| 1  | 1.970986 | -0.291304 | 4.625048  |
| 1  | 4.086836 | 0.527195  | 5.643943  |
| 1  | 4.269164 | 1.721148  | 4.362191  |
| 6  | 3.003067 | 1.587477  | -0.413076 |
| 6  | 4.439545 | 1.529691  | -0.975885 |
| 6  | 2.061204 | 2.321227  | -1.389271 |
| 1  | 3.037902 | 2.184429  | 0.508966  |
| 6  | 4.959163 | 2.940773  | -1.298234 |



|    |           |           |           |
|----|-----------|-----------|-----------|
| 1  | 4.450921  | 0.934652  | -1.896952 |
| 1  | 5.118486  | 1.036328  | -0.273689 |
| 6  | 2.591222  | 3.723459  | -1.722339 |
| 1  | 1.954123  | 1.737778  | -2.311623 |
| 1  | 1.054921  | 2.382320  | -0.967595 |
| 6  | 4.023987  | 3.673696  | -2.269757 |
| 1  | 5.971343  | 2.874097  | -1.715275 |
| 1  | 5.041407  | 3.517831  | -0.365694 |
| 1  | 1.921563  | 4.209109  | -2.441693 |
| 1  | 2.575188  | 4.339890  | -0.811339 |
| 1  | 4.396022  | 4.686243  | -2.467026 |
| 1  | 4.022001  | 3.144521  | -3.233313 |
| 6  | 3.227497  | -1.396770 | -0.735060 |
| 6  | 2.990929  | -2.780157 | -0.093341 |
| 6  | 2.791519  | -1.421321 | -2.217732 |
| 1  | 4.299001  | -1.168102 | -0.684400 |
| 6  | 3.716363  | -3.887148 | -0.875325 |
| 1  | 1.912261  | -2.984165 | -0.082989 |
| 1  | 3.326866  | -2.787690 | 0.949726  |
| 6  | 3.523973  | -2.523198 | -2.997022 |
| 1  | 1.708412  | -1.600119 | -2.262592 |
| 1  | 2.960170  | -0.448481 | -2.691245 |
| 6  | 3.302900  | -3.898658 | -2.353381 |
| 1  | 3.512795  | -4.859867 | -0.411774 |
| 1  | 4.801614  | -3.725170 | -0.804073 |
| 1  | 3.182323  | -2.528054 | -4.038715 |
| 1  | 4.600494  | -2.298957 | -3.017886 |
| 1  | 3.858730  | -4.670859 | -2.898528 |
| 1  | 2.238457  | -4.161647 | -2.427680 |
| 7  | -1.603422 | -0.994549 | -0.749287 |
| 6  | -2.473472 | -1.581736 | 0.295081  |
| 6  | -3.646945 | -2.426699 | -0.260350 |
| 6  | -4.246603 | -3.391068 | 0.789845  |
| 6  | -4.801466 | -1.571581 | -0.834053 |
| 1  | -3.219691 | -3.025596 | -1.075054 |
| 6  | -4.997320 | -2.650570 | 1.908973  |
| 1  | -3.475284 | -4.044113 | 1.209395  |
| 1  | -4.956698 | -4.051215 | 0.272509  |
| 6  | -5.575876 | -0.811196 | 0.255466  |
| 1  | -4.438871 | -0.885108 | -1.600377 |
| 1  | -5.496876 | -2.250205 | -1.347782 |
| 6  | -6.113783 | -1.765409 | 1.332301  |
| 1  | -4.293585 | -2.026601 | 2.476727  |
| 1  | -5.415077 | -3.372395 | 2.621684  |
| 1  | -6.400611 | -0.250387 | -0.201105 |
| 1  | -4.924069 | -0.061282 | 0.721158  |
| 1  | -6.608575 | -1.201915 | 2.133249  |
| 1  | -6.881070 | -2.412915 | 0.883708  |
| 16 | -1.914779 | 0.241232  | -1.740048 |
| 8  | -0.496356 | 0.739603  | -1.957326 |
| 8  | -2.693028 | -0.039103 | -2.957729 |
| 6  | -2.805454 | 1.519765  | -0.837808 |
| 6  | -3.989839 | 2.035437  | -1.361924 |
| 6  | -2.328576 | 1.951303  | 0.404445  |
| 6  | -4.696711 | 2.995574  | -0.637340 |
| 1  | -4.348464 | 1.680167  | -2.321451 |
| 6  | -3.046439 | 2.907598  | 1.116229  |

|   |           |           |           |
|---|-----------|-----------|-----------|
| 1 | -1.411178 | 1.533443  | 0.809780  |
| 6 | -4.240050 | 3.446005  | 0.607915  |
| 1 | -5.620241 | 3.396930  | -1.045988 |
| 1 | -2.678802 | 3.240205  | 2.083783  |
| 6 | -1.441815 | -2.377084 | 1.112996  |
| 6 | -0.215634 | -1.497419 | 1.394214  |
| 1 | -0.455573 | -0.749913 | 2.167290  |
| 1 | -1.144556 | -3.252531 | 0.520765  |
| 1 | -1.885231 | -2.749169 | 2.045717  |
| 1 | -2.862376 | -0.777480 | 0.937459  |
| 1 | 0.619460  | -2.100006 | 1.769072  |
| 6 | -4.994413 | 4.498342  | 1.381705  |
| 1 | -4.516066 | 5.479926  | 1.273440  |
| 1 | -6.025992 | 4.594571  | 1.031286  |
| 1 | -5.018195 | 4.267863  | 2.451887  |

-----  
9  
-----

Number of imaginary frequencies : 0  
The smallest frequencies are : 18.2673 22.4961 33.5385 cm(-1)

Electronic energy : HF=-2445.2487986  
Zero-point correction= 0.856804  
(Hartree/Particle)  
Thermal correction to Energy= 0.898562  
Thermal correction to Enthalpy= 0.899506  
Thermal correction to Gibbs Free Energy= 0.783483  
Sum of electronic and zero-point Energies= -2444.391995  
Sum of electronic and thermal Energies= -2444.350237  
Sum of electronic and thermal Enthalpies= -2444.349293  
Sum of electronic and thermal Free Energies= -2444.465316

.....  
Cartesian Coordinates  
.....

|    |          |           |           |
|----|----------|-----------|-----------|
| 28 | 0.334069 | 1.288273  | 0.311384  |
| 15 | 2.123292 | -0.115664 | -0.023970 |
| 6  | 3.603407 | 0.839756  | -0.694465 |
| 6  | 4.931422 | 0.062748  | -0.808094 |
| 6  | 3.255745 | 1.509492  | -2.040654 |
| 1  | 3.762522 | 1.641477  | 0.034309  |
| 6  | 6.066768 | 0.989475  | -1.277606 |
| 1  | 4.827196 | -0.758571 | -1.528203 |
| 1  | 5.201572 | -0.394454 | 0.149325  |
| 6  | 4.388705 | 2.436522  | -2.507818 |
| 1  | 3.093249 | 0.737195  | -2.803673 |
| 1  | 2.313726 | 2.064146  | -1.954102 |
| 6  | 5.721621 | 1.680284  | -2.604465 |
| 1  | 6.997575 | 0.417615  | -1.375292 |
| 1  | 6.246833 | 1.753337  | -0.507661 |
| 1  | 4.132199 | 2.885334  | -3.474989 |
| 1  | 4.493742 | 3.265057  | -1.792712 |
| 1  | 6.527670 | 2.362738  | -2.899453 |
| 1  | 5.646889 | 0.921159  | -3.396343 |
| 6  | 2.013216 | -1.483959 | -1.334942 |
| 6  | 1.973346 | -2.943121 | -0.839641 |
| 6  | 0.862734 | -1.218933 | -2.327945 |

|    |           |           |           |
|----|-----------|-----------|-----------|
| 1  | 2.951595  | -1.378119 | -1.893496 |
| 6  | 2.039752  | -3.915000 | -2.030604 |
| 1  | 1.046393  | -3.115360 | -0.290254 |
| 1  | 2.806454  | -3.146997 | -0.158453 |
| 6  | 0.924984  | -2.195661 | -3.512069 |
| 1  | -0.085913 | -1.326022 | -1.800229 |
| 1  | 0.895730  | -0.183893 | -2.688015 |
| 6  | 0.905032  | -3.653112 | -3.030472 |
| 1  | 1.996727  | -4.948298 | -1.664883 |
| 1  | 3.006853  | -3.802082 | -2.542934 |
| 1  | 0.086590  | -2.006346 | -4.194036 |
| 1  | 1.844925  | -2.018541 | -4.089432 |
| 1  | 0.977581  | -4.341567 | -3.881545 |
| 1  | -0.056354 | -3.853814 | -2.537684 |
| 6  | 2.814685  | -0.908168 | 1.536711  |
| 6  | 3.517438  | 0.106233  | 2.466210  |
| 6  | 1.723980  | -1.648124 | 2.339608  |
| 1  | 3.565785  | -1.638610 | 1.207124  |
| 6  | 4.137322  | -0.600010 | 3.682803  |
| 1  | 2.775417  | 0.830545  | 2.824672  |
| 1  | 4.292139  | 0.673795  | 1.942073  |
| 6  | 2.318955  | -2.350420 | 3.569997  |
| 1  | 0.962015  | -0.923510 | 2.654371  |
| 1  | 1.196801  | -2.369506 | 1.717825  |
| 6  | 3.077972  | -1.373577 | 4.477522  |
| 1  | 4.636394  | 0.137801  | 4.323076  |
| 1  | 4.916495  | -1.294734 | 3.336755  |
| 1  | 1.518327  | -2.848722 | 4.129273  |
| 1  | 3.006748  | -3.140847 | 3.234385  |
| 1  | 3.542115  | -1.905862 | 5.316881  |
| 1  | 2.364591  | -0.659071 | 4.912379  |
| 7  | -1.189804 | 0.244308  | -0.297121 |
| 6  | -1.598770 | 1.562256  | -0.150510 |
| 6  | -2.867081 | 1.997355  | 0.593166  |
| 6  | -2.915634 | 3.457372  | 1.091528  |
| 6  | -4.089797 | 1.782617  | -0.354137 |
| 1  | -2.984834 | 1.352768  | 1.465979  |
| 6  | -2.951793 | 4.493276  | -0.042034 |
| 1  | -2.101282 | 3.661068  | 1.785592  |
| 1  | -3.841306 | 3.562995  | 1.674898  |
| 6  | -4.179656 | 2.820083  | -1.485442 |
| 1  | -4.073398 | 0.778026  | -0.779489 |
| 1  | -4.998446 | 1.845894  | 0.260220  |
| 6  | -4.164998 | 4.259642  | -0.953720 |
| 1  | -2.033018 | 4.430869  | -0.641014 |
| 1  | -2.978651 | 5.505438  | 0.379496  |
| 1  | -5.090599 | 2.639035  | -2.069085 |
| 1  | -3.341528 | 2.683969  | -2.182092 |
| 1  | -4.168857 | 4.975749  | -1.784503 |
| 1  | -5.083512 | 4.440399  | -0.376690 |
| 16 | -1.625820 | -0.946153 | 0.813692  |
| 8  | -0.796749 | -2.115107 | 0.467865  |
| 8  | -1.642955 | -0.492868 | 2.223698  |
| 6  | -3.305009 | -1.384732 | 0.359983  |
| 6  | -4.332567 | -1.243445 | 1.289397  |
| 6  | -3.552966 | -1.884645 | -0.921238 |
| 6  | -5.631829 | -1.594493 | 0.922169  |

|   |           |           |           |
|---|-----------|-----------|-----------|
| 1 | -4.110546 | -0.858707 | 2.278752  |
| 6 | -4.856604 | -2.219490 | -1.274525 |
| 1 | -2.738687 | -1.995969 | -1.629450 |
| 6 | -5.914738 | -2.081627 | -0.360619 |
| 1 | -6.438000 | -1.484717 | 1.642768  |
| 1 | -5.059842 | -2.597883 | -2.273010 |
| 6 | 0.274517  | 3.164165  | 1.130884  |
| 6 | 1.587835  | 2.778796  | 0.901775  |
| 1 | 2.124534  | 3.174370  | 0.042556  |
| 1 | -0.158424 | 3.060709  | 2.122401  |
| 1 | -0.213104 | 3.875805  | 0.474382  |
| 1 | -1.474915 | 2.090079  | -1.101566 |
| 1 | 2.212009  | 2.439409  | 1.721751  |
| 6 | -7.316449 | -2.484914 | -0.746029 |
| 1 | -7.517827 | -2.276118 | -1.801507 |
| 1 | -7.466983 | -3.561089 | -0.593210 |
| 1 | -8.066558 | -1.961823 | -0.145528 |

-----  
**TS [8-9]**  
 -----

Number of imaginary frequencies : 1  
 The smallest frequencies are : -182.1527 14.6377 18.1233 cm(-1)

Electronic energy : HF=-2445.2285914  
 Zero-point correction= 0.856313  
 (Hartree/Particle)  
 Thermal correction to Energy= 0.897342  
 Thermal correction to Enthalpy= 0.898287  
 Thermal correction to Gibbs Free Energy= 0.781856  
 Sum of electronic and zero-point Energies= -2444.372279  
 Sum of electronic and thermal Energies= -2444.331249  
 Sum of electronic and thermal Enthalpies= -2444.330305  
 Sum of electronic and thermal Free Energies= -2444.446735

.....  
 Cartesian Coordinates  
 .....

|    |          |           |           |
|----|----------|-----------|-----------|
| 28 | 0.414259 | 0.890979  | 0.452577  |
| 15 | 2.263737 | -0.084847 | -0.054461 |
| 6  | 3.604216 | 1.196342  | -0.300209 |
| 6  | 5.005452 | 0.643454  | -0.620470 |
| 6  | 3.186250 | 2.255810  | -1.341251 |
| 1  | 3.643499 | 1.702770  | 0.672303  |
| 6  | 6.040020 | 1.778797  | -0.694022 |
| 1  | 4.978263 | 0.121876  | -1.585821 |
| 1  | 5.314369 | -0.093546 | 0.129048  |
| 6  | 4.220199 | 3.390364  | -1.415386 |
| 1  | 3.096895 | 1.789161  | -2.331962 |
| 1  | 2.196261 | 2.653214  | -1.090332 |
| 6  | 5.627064 | 2.851062  | -1.712535 |
| 1  | 7.025467 | 1.370213  | -0.947857 |
| 1  | 6.136884 | 2.239633  | 0.299292  |
| 1  | 3.921248 | 4.119277  | -2.178067 |
| 1  | 4.232149 | 3.925723  | -0.455301 |
| 1  | 6.355819 | 3.670358  | -1.719983 |
| 1  | 5.637415 | 2.411499  | -2.720220 |
| 6  | 2.297271 | -1.069545 | -1.664308 |

|    |           |           |           |
|----|-----------|-----------|-----------|
| 6  | 3.227415  | -2.300925 | -1.674569 |
| 6  | 0.885905  | -1.451434 | -2.153854 |
| 1  | 2.706675  | -0.345190 | -2.382883 |
| 6  | 3.278298  | -2.935828 | -3.074729 |
| 1  | 2.854036  | -3.045958 | -0.961682 |
| 1  | 4.240377  | -2.035080 | -1.355514 |
| 6  | 0.942513  | -2.088950 | -3.549679 |
| 1  | 0.427653  | -2.145987 | -1.443221 |
| 1  | 0.235341  | -0.572052 | -2.152578 |
| 6  | 1.875970  | -3.307069 | -3.575835 |
| 1  | 3.927080  | -3.820028 | -3.055678 |
| 1  | 3.737851  | -2.223587 | -3.775500 |
| 1  | -0.067945 | -2.376264 | -3.865431 |
| 1  | 1.299528  | -1.345695 | -4.278274 |
| 1  | 1.932515  | -3.729136 | -4.586640 |
| 1  | 1.459848  | -4.091257 | -2.927725 |
| 6  | 2.909304  | -1.210220 | 1.292750  |
| 6  | 3.390771  | -0.434522 | 2.535683  |
| 6  | 1.829348  | -2.235269 | 1.694912  |
| 1  | 3.770329  | -1.748004 | 0.876309  |
| 6  | 3.913512  | -1.396433 | 3.615008  |
| 1  | 2.552903  | 0.143236  | 2.943620  |
| 1  | 4.177204  | 0.281613  | 2.274801  |
| 6  | 2.350165  | -3.197825 | 2.770926  |
| 1  | 0.951116  | -1.697151 | 2.068894  |
| 1  | 1.470383  | -2.791589 | 0.825713  |
| 6  | 2.854837  | -2.437381 | 4.004699  |
| 1  | 4.232280  | -0.824247 | 4.494834  |
| 1  | 4.807316  | -1.911569 | 3.234595  |
| 1  | 1.554177  | -3.897141 | 3.051993  |
| 1  | 3.170457  | -3.801811 | 2.355504  |
| 1  | 3.261055  | -3.133984 | 4.748154  |
| 1  | 2.006232  | -1.925532 | 4.479877  |
| 7  | -1.320356 | 0.270662  | -0.205525 |
| 6  | -1.593911 | 1.631837  | 0.214215  |
| 6  | -3.049713 | 1.954458  | 0.654988  |
| 6  | -3.331345 | 3.358906  | 1.235669  |
| 6  | -3.983401 | 1.757357  | -0.573134 |
| 1  | -3.317112 | 1.228850  | 1.426160  |
| 6  | -3.173750 | 4.492221  | 0.210023  |
| 1  | -2.739253 | 3.555648  | 2.132303  |
| 1  | -4.377245 | 3.347936  | 1.572384  |
| 6  | -3.870414 | 2.883874  | -1.613543 |
| 1  | -3.786094 | 0.798604  | -1.052019 |
| 1  | -5.015499 | 1.716145  | -0.200326 |
| 6  | -4.099274 | 4.269116  | -0.994539 |
| 1  | -2.132371 | 4.546643  | -0.138272 |
| 1  | -3.390051 | 5.456101  | 0.686190  |
| 1  | -4.591549 | 2.704069  | -2.420093 |
| 1  | -2.878477 | 2.856036  | -2.084536 |
| 1  | -3.953087 | 5.055305  | -1.745236 |
| 1  | -5.143270 | 4.344639  | -0.657582 |
| 16 | -1.802088 | -0.987058 | 0.774162  |
| 8  | -0.988925 | -2.159704 | 0.396576  |
| 8  | -1.864860 | -0.615412 | 2.211457  |
| 6  | -3.477146 | -1.403422 | 0.262745  |
| 6  | -4.534135 | -1.288953 | 1.162054  |



|    |           |           |           |
|----|-----------|-----------|-----------|
| 1  | 2.202869  | -5.592368 | -1.689299 |
| 6  | 0.116988  | -2.092256 | 1.412347  |
| 6  | 0.680283  | -2.715190 | 2.710286  |
| 6  | -1.172677 | -1.314921 | 1.746443  |
| 1  | -0.161813 | -2.913326 | 0.733454  |
| 6  | -0.357273 | -3.637750 | 3.373627  |
| 1  | 0.932583  | -1.910175 | 3.410878  |
| 1  | 1.601109  | -3.269698 | 2.529672  |
| 6  | -2.216238 | -2.226836 | 2.407104  |
| 1  | -0.927274 | -0.502193 | 2.440672  |
| 1  | -1.573480 | -0.835782 | 0.853366  |
| 6  | -1.665267 | -2.893621 | 3.673901  |
| 1  | 0.062556  | -4.063695 | 4.293397  |
| 1  | -0.565035 | -4.484155 | 2.702801  |
| 1  | -3.120900 | -1.650112 | 2.633899  |
| 1  | -2.517811 | -3.004770 | 1.691814  |
| 1  | -2.405359 | -3.578723 | 4.105218  |
| 1  | -1.471381 | -2.120932 | 4.431689  |
| 6  | 2.464499  | -0.119087 | 1.458823  |
| 6  | 1.661679  | 0.819149  | 2.385773  |
| 6  | 3.597672  | -0.823428 | 2.228671  |
| 1  | 2.950027  | 0.534069  | 0.723569  |
| 6  | 2.583798  | 1.850955  | 3.051285  |
| 1  | 1.157274  | 0.233833  | 3.164031  |
| 1  | 0.875475  | 1.324567  | 1.814747  |
| 6  | 4.511514  | 0.214160  | 2.907199  |
| 1  | 3.184723  | -1.495450 | 2.989125  |
| 1  | 4.194333  | -1.440694 | 1.548457  |
| 6  | 3.719401  | 1.160678  | 3.820451  |
| 1  | 2.002311  | 2.495623  | 3.721427  |
| 1  | 3.012293  | 2.501253  | 2.275831  |
| 1  | 5.297501  | -0.298430 | 3.475249  |
| 1  | 5.014824  | 0.806181  | 2.130478  |
| 1  | 4.388704  | 1.906947  | 4.264901  |
| 1  | 3.291383  | 0.584873  | 4.653813  |
| 7  | -1.317668 | 0.751147  | -0.792638 |
| 6  | -1.948257 | 2.065537  | -0.454234 |
| 6  | -3.056018 | 1.898978  | 0.633530  |
| 6  | -2.588445 | 2.028523  | 2.102523  |
| 6  | -4.280757 | 2.806707  | 0.382255  |
| 1  | -3.405281 | 0.870008  | 0.512254  |
| 6  | -2.464456 | 3.471879  | 2.626136  |
| 1  | -1.641794 | 1.496669  | 2.238731  |
| 1  | -3.323529 | 1.504707  | 2.729462  |
| 6  | -4.075134 | 4.256475  | 0.841082  |
| 1  | -4.552147 | 2.773466  | -0.679775 |
| 1  | -5.137308 | 2.389654  | 0.930871  |
| 6  | -3.722690 | 4.302337  | 2.334534  |
| 1  | -1.602749 | 3.970542  | 2.170187  |
| 1  | -2.267803 | 3.448239  | 3.705678  |
| 1  | -4.979741 | 4.844702  | 0.643008  |
| 1  | -3.267416 | 4.722011  | 0.259474  |
| 1  | -3.579164 | 5.337688  | 2.667294  |
| 1  | -4.568184 | 3.900392  | 2.911954  |
| 16 | -1.931249 | -0.012306 | -2.109991 |
| 8  | -2.263654 | 0.904301  | -3.226715 |
| 8  | -1.023209 | -1.152739 | -2.390871 |

|   |           |           |           |
|---|-----------|-----------|-----------|
| 6 | -3.498044 | -0.728047 | -1.587354 |
| 6 | -3.502198 | -1.942843 | -0.899471 |
| 6 | -4.689138 | -0.042286 | -1.826691 |
| 6 | -4.708478 | -2.459129 | -0.432577 |
| 1 | -2.568766 | -2.470449 | -0.740295 |
| 6 | -5.888679 | -0.567943 | -1.348173 |
| 1 | -4.668021 | 0.888283  | -2.382731 |
| 6 | -5.918304 | -1.779555 | -0.643527 |
| 1 | -4.713067 | -3.404063 | 0.104900  |
| 1 | -6.816049 | -0.030134 | -1.528145 |
| 6 | -0.746904 | 2.956772  | -0.139992 |
| 6 | 0.293289  | 2.694536  | -1.217965 |
| 1 | -0.084521 | 2.988035  | -2.203014 |
| 1 | -0.337205 | 2.700598  | 0.842431  |
| 1 | -1.027127 | 4.019119  | -0.096734 |
| 1 | -2.422355 | 2.478215  | -1.354897 |
| 1 | 1.249571  | 3.192417  | -1.024251 |
| 6 | 2.638538  | 0.715113  | -2.112547 |
| 6 | 1.542785  | 0.923401  | -2.932623 |
| 1 | 1.358005  | 1.879052  | -3.410092 |
| 1 | 1.024947  | 0.078972  | -3.382188 |
| 1 | 2.934551  | -0.310841 | -1.932926 |
| 6 | 3.651554  | 1.705173  | -1.704533 |
| 6 | 3.604631  | 3.064304  | -2.069661 |
| 6 | 4.743076  | 1.272013  | -0.926753 |
| 6 | 4.587790  | 3.953664  | -1.641229 |
| 1 | 2.799910  | 3.427188  | -2.699566 |
| 6 | 5.727812  | 2.161027  | -0.498976 |
| 1 | 4.818974  | 0.221361  | -0.658791 |
| 6 | 5.649562  | 3.511197  | -0.846562 |
| 1 | 4.528247  | 4.997993  | -1.934873 |
| 1 | 6.556348  | 1.797326  | 0.102261  |
| 1 | 6.412664  | 4.208642  | -0.513877 |
| 6 | -7.222162 | -2.357937 | -0.151436 |
| 1 | -7.959817 | -1.574975 | 0.049467  |
| 1 | -7.658358 | -3.033382 | -0.898377 |
| 1 | -7.082501 | -2.936741 | 0.766992  |

-----  
**TS [A-B]**  
 -----

Normal termination of Gaussian 09 at Fri Apr 19 22:04:20 2019.

Number of imaginary frequencies : 1

The smallest frequencies are : -287.7869 17.5455 23.1443 cm(-1)

Electronic energy : HF=-2754.9293157

Zero-point correction= 0.997103  
 (Hartree/Particle)

Thermal correction to Energy= 1.044737

Thermal correction to Enthalpy= 1.045681

Thermal correction to Gibbs Free Energy= 0.916866

Sum of electronic and zero-point Energies= -2753.932213

Sum of electronic and thermal Energies= -2753.884579

Sum of electronic and thermal Enthalpies= -2753.883634

Sum of electronic and thermal Free Energies= -2754.012450

.....  
 Cartesian Coordinates



|    |           |           |           |
|----|-----------|-----------|-----------|
| 28 | 0.496187  | 0.499884  | -1.228813 |
| 15 | 1.433839  | -0.840680 | 0.365609  |
| 6  | 2.494334  | -2.163036 | -0.453755 |
| 6  | 3.129474  | -3.276391 | 0.407077  |
| 6  | 1.726512  | -2.823447 | -1.623082 |
| 1  | 3.319285  | -1.570452 | -0.872146 |
| 6  | 4.085570  | -4.132727 | -0.442554 |
| 1  | 2.338008  | -3.921712 | 0.807597  |
| 1  | 3.673731  | -2.867744 | 1.260795  |
| 6  | 2.662367  | -3.683789 | -2.484421 |
| 1  | 0.922412  | -3.446279 | -1.215741 |
| 1  | 1.216473  | -2.076224 | -2.234597 |
| 6  | 3.370503  | -4.757494 | -1.647144 |
| 1  | 4.535614  | -4.912660 | 0.183635  |
| 1  | 4.912133  | -3.499481 | -0.796630 |
| 1  | 2.093333  | -4.146965 | -3.298978 |
| 1  | 3.415959  | -3.035577 | -2.956428 |
| 1  | 4.081349  | -5.321235 | -2.263420 |
| 1  | 2.624086  | -5.479239 | -1.285868 |
| 6  | 0.391183  | -1.783274 | 1.622066  |
| 6  | 1.146916  | -2.260586 | 2.884852  |
| 6  | -0.893792 | -1.058588 | 2.068207  |
| 1  | 0.081201  | -2.659597 | 1.035734  |
| 6  | 0.269258  | -3.194438 | 3.735918  |
| 1  | 1.411699  | -1.384004 | 3.488247  |
| 1  | 2.080299  | -2.765342 | 2.641647  |
| 6  | -1.781036 | -1.981254 | 2.917736  |
| 1  | -0.623836 | -0.183290 | 2.671523  |
| 1  | -1.429221 | -0.686295 | 1.196693  |
| 6  | -1.040867 | -2.513399 | 4.150507  |
| 1  | 0.830405  | -3.520803 | 4.620207  |
| 1  | 0.042242  | -4.100378 | 3.155569  |
| 1  | -2.692772 | -1.446502 | 3.211101  |
| 1  | -2.102611 | -2.835701 | 2.305426  |
| 1  | -1.674191 | -3.209511 | 4.714075  |
| 1  | -0.812529 | -1.675914 | 4.825437  |
| 6  | 2.609106  | 0.311317  | 1.266954  |
| 6  | 1.821055  | 1.346749  | 2.097186  |
| 6  | 3.809754  | -0.252115 | 2.052058  |
| 1  | 3.036861  | 0.860769  | 0.424902  |
| 6  | 2.741130  | 2.475438  | 2.586182  |
| 1  | 1.353320  | 0.860774  | 2.962093  |
| 1  | 1.007972  | 1.762130  | 1.489955  |
| 6  | 4.715080  | 0.894638  | 2.536183  |
| 1  | 3.475128  | -0.836542 | 2.914732  |
| 1  | 4.394604  | -0.922233 | 1.414901  |
| 6  | 3.936535  | 1.918984  | 3.372789  |
| 1  | 2.169986  | 3.182005  | 3.200819  |
| 1  | 3.111414  | 3.032345  | 1.715069  |
| 1  | 5.551955  | 0.484134  | 3.114485  |
| 1  | 5.147854  | 1.398630  | 1.661410  |
| 1  | 4.598444  | 2.735147  | 3.686920  |
| 1  | 3.572535  | 1.436929  | 4.291895  |
| 7  | -1.420300 | 0.289823  | -0.745715 |
| 6  | -2.161427 | 1.577054  | -0.773353 |
| 6  | -3.015090 | 1.760117  | 0.516126  |

|    |           |           |           |
|----|-----------|-----------|-----------|
| 6  | -2.231119 | 2.228934  | 1.764122  |
| 6  | -4.278951 | 2.625837  | 0.304955  |
| 1  | -3.374332 | 0.750321  | 0.733887  |
| 6  | -2.044541 | 3.752498  | 1.890539  |
| 1  | -1.259564 | 1.728820  | 1.792404  |
| 1  | -2.776954 | 1.881849  | 2.652278  |
| 6  | -4.033231 | 4.139376  | 0.381951  |
| 1  | -4.753175 | 2.357524  | -0.646860 |
| 1  | -5.002660 | 2.361434  | 1.088891  |
| 6  | -3.366164 | 4.512193  | 1.713335  |
| 1  | -1.331574 | 4.114192  | 1.141296  |
| 1  | -1.602019 | 3.980921  | 2.868375  |
| 1  | -4.982867 | 4.676631  | 0.266007  |
| 1  | -3.391447 | 4.462156  | -0.448918 |
| 1  | -3.194202 | 5.594000  | 1.771040  |
| 1  | -4.047117 | 4.256368  | 2.538163  |
| 16 | -2.027018 | -0.890326 | -1.695975 |
| 8  | -2.138936 | -0.505020 | -3.128047 |
| 8  | -1.281330 | -2.130829 | -1.377010 |
| 6  | -3.722706 | -1.139450 | -1.136994 |
| 6  | -3.954005 | -1.915732 | -0.001088 |
| 6  | -4.781996 | -0.521283 | -1.802014 |
| 6  | -5.252325 | -2.051598 | 0.484550  |
| 1  | -3.121008 | -2.406652 | 0.486428  |
| 6  | -6.077452 | -0.665467 | -1.305530 |
| 1  | -4.586449 | 0.055119  | -2.699685 |
| 6  | -6.332854 | -1.424236 | -0.154296 |
| 1  | -5.430584 | -2.653251 | 1.372388  |
| 1  | -6.903759 | -0.181647 | -1.820482 |
| 6  | -1.081698 | 2.611256  | -1.067830 |
| 6  | -0.308229 | 2.204082  | -2.329989 |
| 1  | -1.007506 | 1.909064  | -3.112944 |
| 1  | -0.413955 | 2.721760  | -0.205066 |
| 1  | -1.510340 | 3.607253  | -1.250732 |
| 1  | -2.856299 | 1.602130  | -1.624381 |
| 1  | 0.261792  | 3.070521  | -2.653099 |
| 6  | 2.218423  | 0.591122  | -2.259107 |
| 6  | 1.165209  | 1.022761  | -3.139697 |
| 1  | 1.336747  | 1.900014  | -3.750422 |
| 1  | 0.626374  | 0.244241  | -3.679782 |
| 1  | 2.552906  | -0.429453 | -2.417408 |
| 6  | 3.303614  | 1.503439  | -1.836670 |
| 6  | 3.071458  | 2.849419  | -1.490706 |
| 6  | 4.618425  | 1.015242  | -1.712141 |
| 6  | 4.107027  | 3.666197  | -1.039425 |
| 1  | 2.064034  | 3.246174  | -1.546508 |
| 6  | 5.655304  | 1.831393  | -1.259441 |
| 1  | 4.824564  | -0.019317 | -1.975802 |
| 6  | 5.405773  | 3.162835  | -0.917792 |
| 1  | 3.897526  | 4.698746  | -0.773020 |
| 1  | 6.660032  | 1.426421  | -1.174282 |
| 1  | 6.210497  | 3.799087  | -0.561545 |
| 6  | -7.741664 | -1.594580 | 0.358856  |
| 1  | -8.346360 | -0.700940 | 0.174962  |
| 1  | -8.242094 | -2.433307 | -0.141707 |
| 1  | -7.756854 | -1.800633 | 1.433452  |



|    |           |           |           |
|----|-----------|-----------|-----------|
| 6  | 4.104022  | -0.003961 | 2.019693  |
| 1  | 3.108916  | 1.159937  | 0.540887  |
| 6  | 2.551653  | 2.362779  | 2.947020  |
| 1  | 1.487130  | 0.483152  | 3.035261  |
| 1  | 0.973767  | 1.525443  | 1.711909  |
| 6  | 4.785251  | 1.204287  | 2.686426  |
| 1  | 3.890109  | -0.762489 | 2.779516  |
| 1  | 4.794039  | -0.453519 | 1.299388  |
| 6  | 3.839727  | 1.924556  | 3.657791  |
| 1  | 1.864729  | 2.843703  | 3.653686  |
| 1  | 2.798639  | 3.109669  | 2.181876  |
| 1  | 5.692795  | 0.875861  | 3.207206  |
| 1  | 5.103111  | 1.906855  | 1.903932  |
| 1  | 4.341304  | 2.791592  | 4.104305  |
| 1  | 3.585578  | 1.246985  | 4.486112  |
| 7  | -1.690135 | 0.513641  | -1.059512 |
| 6  | -2.411252 | 1.786490  | -0.814880 |
| 6  | -3.186068 | 1.682413  | 0.535405  |
| 6  | -2.278763 | 1.548320  | 1.781306  |
| 6  | -4.281996 | 2.758508  | 0.739071  |
| 1  | -3.718993 | 0.731890  | 0.447437  |
| 6  | -1.850289 | 2.870407  | 2.439979  |
| 1  | -1.398754 | 0.955726  | 1.514659  |
| 1  | -2.823590 | 0.962001  | 2.534549  |
| 6  | -3.828905 | 4.062108  | 1.419714  |
| 1  | -4.764794 | 2.979935  | -0.221697 |
| 1  | -5.062026 | 2.313724  | 1.372651  |
| 6  | -3.056626 | 3.777374  | 2.715294  |
| 1  | -1.139861 | 3.406441  | 1.800054  |
| 1  | -1.317734 | 2.651634  | 3.374585  |
| 1  | -4.708222 | 4.683842  | 1.629909  |
| 1  | -3.193964 | 4.650676  | 0.746544  |
| 1  | -2.733800 | 4.715680  | 3.182805  |
| 1  | -3.725730 | 3.280708  | 3.433541  |
| 16 | -2.375183 | -0.561770 | -2.094107 |
| 8  | -2.915658 | 0.082601  | -3.312571 |
| 8  | -1.400066 | -1.667434 | -2.246584 |
| 6  | -3.794407 | -1.241745 | -1.220822 |
| 6  | -3.588663 | -2.221291 | -0.245418 |
| 6  | -5.069768 | -0.734082 | -1.461981 |
| 6  | -4.669225 | -2.676576 | 0.502555  |
| 1  | -2.593766 | -2.621779 | -0.089596 |
| 6  | -6.145008 | -1.200477 | -0.703056 |
| 1  | -5.210461 | 0.015140  | -2.233373 |
| 6  | -5.962819 | -2.169665 | 0.291410  |
| 1  | -4.511915 | -3.440393 | 1.260223  |
| 1  | -7.139973 | -0.804217 | -0.888196 |
| 6  | -1.400236 | 2.937260  | -0.893643 |
| 6  | -0.798840 | 3.223805  | -2.276199 |
| 1  | -1.601937 | 3.560833  | -2.944886 |
| 1  | -0.598554 | 2.720055  | -0.177912 |
| 1  | -1.883309 | 3.854170  | -0.544904 |
| 1  | -3.156309 | 1.940356  | -1.608066 |
| 1  | -0.122796 | 4.081219  | -2.171609 |
| 6  | 0.966491  | 1.227611  | -2.210791 |
| 6  | -0.059969 | 2.074667  | -2.990217 |
| 1  | 0.467445  | 2.518060  | -3.850695 |

|   |           |           |           |
|---|-----------|-----------|-----------|
| 1 | -0.799337 | 1.390207  | -3.406599 |
| 1 | 1.244872  | 0.394532  | -2.868808 |
| 6 | 2.216387  | 1.929348  | -1.786738 |
| 6 | 2.222460  | 3.058780  | -0.942825 |
| 6 | 3.467319  | 1.458201  | -2.233763 |
| 6 | 3.414220  | 3.678062  | -0.565955 |
| 1 | 1.287207  | 3.438607  | -0.552587 |
| 6 | 4.663012  | 2.062718  | -1.844063 |
| 1 | 3.494442  | 0.604046  | -2.905422 |
| 6 | 4.644146  | 3.179734  | -1.005506 |
| 1 | 3.382654  | 4.546986  | 0.085959  |
| 1 | 5.608903  | 1.667543  | -2.205276 |
| 1 | 5.571370  | 3.658379  | -0.704097 |
| 6 | -7.123209 | -2.684068 | 1.107246  |
| 1 | -8.028679 | -2.093934 | 0.940112  |
| 1 | -7.352807 | -3.725526 | 0.850489  |
| 1 | -6.897161 | -2.661029 | 2.179203  |

-----  
**8a**  
-----

Number of imaginary frequencies : 0  
The smallest frequencies are : 15.5467 23.4031 23.8716 cm(-1)

Electronic energy : HF=-3672.2221557  
Zero-point correction= 1.228408  
(Hartree/Particle)  
Thermal correction to Energy= 1.291019  
Thermal correction to Enthalpy= 1.291963  
Thermal correction to Gibbs Free Energy= 1.129828  
Sum of electronic and zero-point Energies= -3670.993748  
Sum of electronic and thermal Energies= -3670.931136  
Sum of electronic and thermal Enthalpies= -3670.930192  
Sum of electronic and thermal Free Energies= -3671.092328

.....  
Cartesian Coordinates  
.....

|    |           |           |           |
|----|-----------|-----------|-----------|
| 28 | 3.196184  | -0.241676 | -0.062250 |
| 15 | 2.231244  | -2.120039 | -0.396309 |
| 6  | 1.231980  | -2.622672 | 1.102859  |
| 6  | 0.846288  | -4.114056 | 1.171316  |
| 6  | 1.863210  | -2.145207 | 2.427460  |
| 1  | 0.320563  | -2.029563 | 0.972891  |
| 6  | -0.101925 | -4.373297 | 2.354087  |
| 1  | 1.747016  | -4.726047 | 1.299798  |
| 1  | 0.377834  | -4.443546 | 0.237454  |
| 6  | 0.912056  | -2.418056 | 3.602747  |
| 1  | 2.817402  | -2.659386 | 2.600781  |
| 1  | 2.076866  | -1.074176 | 2.368016  |
| 6  | 0.508744  | -3.896996 | 3.679447  |
| 1  | -0.350056 | -5.440453 | 2.405543  |
| 1  | -1.044709 | -3.837971 | 2.179701  |
| 1  | 1.379369  | -2.097034 | 4.541177  |
| 1  | 0.009998  | -1.803608 | 3.475983  |
| 1  | -0.197958 | -4.058876 | 4.502313  |
| 1  | 1.398319  | -4.503205 | 3.904687  |
| 6  | 3.358346  | -3.542945 | -0.840067 |

|    |           |           |           |
|----|-----------|-----------|-----------|
| 6  | 4.154512  | -3.209073 | -2.120945 |
| 6  | 4.326405  | -3.946843 | 0.289833  |
| 1  | 2.695983  | -4.394981 | -1.053450 |
| 6  | 5.055431  | -4.379453 | -2.545764 |
| 1  | 4.769672  | -2.320119 | -1.923866 |
| 1  | 3.482038  | -2.948497 | -2.945003 |
| 6  | 5.210850  | -5.130314 | -0.134977 |
| 1  | 4.964428  | -3.090957 | 0.533691  |
| 1  | 3.779978  | -4.200531 | 1.202640  |
| 6  | 5.997313  | -4.808808 | -1.412883 |
| 1  | 5.629930  | -4.099629 | -3.437022 |
| 1  | 4.423573  | -5.231685 | -2.833743 |
| 1  | 5.896052  | -5.390905 | 0.680517  |
| 1  | 4.578444  | -6.012789 | -0.308503 |
| 1  | 6.597143  | -5.673197 | -1.721970 |
| 1  | 6.703958  | -3.993148 | -1.203164 |
| 6  | 1.036449  | -2.100509 | -1.864051 |
| 6  | -0.461529 | -2.166574 | -1.507801 |
| 6  | 1.307338  | -0.868036 | -2.756212 |
| 1  | 1.280178  | -3.006536 | -2.437377 |
| 6  | -1.322148 | -2.202902 | -2.779670 |
| 1  | -0.729932 | -1.286487 | -0.918644 |
| 1  | -0.683701 | -3.046374 | -0.898267 |
| 6  | 0.433237  | -0.881631 | -4.018862 |
| 1  | 1.106471  | 0.033248  | -2.167945 |
| 1  | 2.368807  | -0.821602 | -3.029901 |
| 6  | -1.058875 | -0.980282 | -3.668337 |
| 1  | -2.379933 | -2.257923 | -2.496802 |
| 1  | -1.102388 | -3.121567 | -3.344044 |
| 1  | 0.627908  | 0.021657  | -4.609434 |
| 1  | 0.715271  | -1.738492 | -4.648971 |
| 1  | -1.660881 | -1.034909 | -4.584084 |
| 1  | -1.371736 | -0.072149 | -3.136266 |
| 7  | 2.231770  | 1.427623  | -0.334764 |
| 6  | 3.590923  | 1.950545  | -0.042099 |
| 6  | 3.607897  | 3.412697  | 0.500130  |
| 6  | 4.988168  | 3.966939  | 0.915285  |
| 6  | 2.999901  | 4.366225  | -0.559975 |
| 1  | 2.974055  | 3.422470  | 1.391531  |
| 6  | 5.939838  | 4.174834  | -0.273587 |
| 1  | 5.455453  | 3.350594  | 1.688375  |
| 1  | 4.807182  | 4.942902  | 1.386404  |
| 6  | 3.934853  | 4.620395  | -1.754546 |
| 1  | 2.045371  | 3.978554  | -0.916268 |
| 1  | 2.785706  | 5.322117  | -0.063901 |
| 6  | 5.316456  | 5.120566  | -1.310585 |
| 1  | 6.163431  | 3.209467  | -0.750099 |
| 1  | 6.898119  | 4.573073  | 0.081323  |
| 1  | 3.467514  | 5.344618  | -2.432509 |
| 1  | 4.053484  | 3.695925  | -2.336192 |
| 1  | 5.980384  | 5.234623  | -2.176118 |
| 1  | 5.210565  | 6.118275  | -0.860805 |
| 16 | 1.076729  | 1.473688  | 0.832179  |
| 8  | 0.087895  | 0.421266  | 0.452881  |
| 8  | 1.601263  | 1.430633  | 2.222482  |
| 6  | 0.185716  | 3.020610  | 0.656655  |
| 6  | 0.160004  | 3.937558  | 1.703814  |

|    |           |           |           |
|----|-----------|-----------|-----------|
| 6  | -0.526026 | 3.254449  | -0.522187 |
| 6  | -0.604220 | 5.098365  | 1.570128  |
| 1  | 0.712501  | 3.729716  | 2.613322  |
| 6  | -1.288257 | 4.410781  | -0.636231 |
| 1  | -0.515773 | 2.531067  | -1.328715 |
| 6  | -1.346533 | 5.346102  | 0.408817  |
| 1  | -0.636946 | 5.812143  | 2.389363  |
| 1  | -1.873885 | 4.568509  | -1.536327 |
| 6  | 4.604549  | 1.019026  | 0.962155  |
| 6  | 4.814771  | -0.501369 | 0.779828  |
| 1  | 5.682237  | -0.759742 | 0.163842  |
| 1  | 4.276502  | 1.253182  | 1.975095  |
| 1  | 5.550031  | 1.510751  | 0.737718  |
| 1  | 4.082495  | 1.950078  | -1.020340 |
| 7  | -2.752491 | 0.583913  | 0.042893  |
| 1  | -1.743188 | 0.762000  | -0.015067 |
| 6  | -3.212370 | 0.302850  | 1.429686  |
| 6  | -2.772412 | -1.137014 | 1.797331  |
| 6  | -3.228229 | -1.561503 | 3.212271  |
| 6  | -3.275868 | -2.175881 | 0.769045  |
| 1  | -1.676062 | -1.138878 | 1.768583  |
| 6  | -4.743213 | -1.805173 | 3.306020  |
| 1  | -2.920240 | -0.823622 | 3.956652  |
| 1  | -2.708735 | -2.496952 | 3.462983  |
| 6  | -4.786248 | -2.444715 | 0.858995  |
| 1  | -3.014224 | -1.852749 | -0.240380 |
| 1  | -2.741930 | -3.118179 | 0.952220  |
| 6  | -5.205297 | -2.848654 | 2.279104  |
| 1  | -5.282606 | -0.862764 | 3.137390  |
| 1  | -5.002306 | -2.127695 | 4.321840  |
| 1  | -5.060731 | -3.227997 | 0.141844  |
| 1  | -5.342564 | -1.550535 | 0.554825  |
| 1  | -6.292154 | -2.988126 | 2.334222  |
| 1  | -4.749633 | -3.818408 | 2.527990  |
| 16 | -3.634072 | 1.611260  | -0.921473 |
| 8  | -4.178157 | 2.767069  | -0.185828 |
| 8  | -2.809802 | 1.830658  | -2.123394 |
| 6  | -5.030873 | 0.575144  | -1.354713 |
| 6  | -4.846178 | -0.459811 | -2.274463 |
| 6  | -6.266420 | 0.785591  | -0.746194 |
| 6  | -5.913185 | -1.301538 | -2.567952 |
| 1  | -3.882183 | -0.591167 | -2.752270 |
| 6  | -7.326787 | -0.070327 | -1.050517 |
| 1  | -6.388967 | 1.608113  | -0.050206 |
| 6  | -7.165834 | -1.127511 | -1.954672 |
| 1  | -5.776103 | -2.108822 | -3.282702 |
| 1  | -8.291303 | 0.086125  | -0.575119 |
| 6  | -2.732976 | 1.410641  | 2.350276  |
| 6  | -1.663101 | 1.372881  | 3.143449  |
| 1  | -3.290126 | 2.339281  | 2.245633  |
| 1  | -1.358827 | 2.248610  | 3.708294  |
| 1  | -1.030302 | 0.497732  | 3.244353  |
| 1  | -4.306945 | 0.334736  | 1.398647  |
| 6  | -2.233930 | 6.558810  | 0.286094  |
| 1  | -2.064557 | 7.086348  | -0.659225 |
| 1  | -3.288958 | 6.259449  | 0.301815  |
| 1  | -2.072391 | 7.266831  | 1.104100  |

|   |           |           |           |
|---|-----------|-----------|-----------|
| 6 | -8.294753 | -2.083864 | -2.247428 |
| 1 | -8.146621 | -3.030501 | -1.712813 |
| 1 | -9.261550 | -1.677486 | -1.937068 |
| 1 | -8.351008 | -2.321696 | -3.314759 |
| 1 | 4.822728  | -1.049955 | 1.723418  |

-----  
**TS[8a-9a]**  
 -----

Number of imaginary frequencies : 1  
 The smallest frequencies are : -158.5784 14.8449 24.2358 cm(-1)

Electronic energy : HF=-3672.2216749  
 Zero-point correction= 1.228374  
 (Hartree/Particle)  
 Thermal correction to Energy= 1.290300  
 Thermal correction to Enthalpy= 1.291244  
 Thermal correction to Gibbs Free Energy= 1.131157  
 Sum of electronic and zero-point Energies= -3670.993301  
 Sum of electronic and thermal Energies= -3670.931375  
 Sum of electronic and thermal Enthalpies= -3670.930431  
 Sum of electronic and thermal Free Energies= -3671.090517

.....  
 Cartesian Coordinates  
 .....

|    |           |           |           |
|----|-----------|-----------|-----------|
| 28 | -3.247571 | -0.207027 | 0.017867  |
| 15 | -2.236025 | -2.075409 | 0.388318  |
| 6  | -1.227098 | -2.609498 | -1.094887 |
| 6  | -0.831236 | -4.099239 | -1.136414 |
| 6  | -1.859425 | -2.161433 | -2.429524 |
| 1  | -0.318814 | -2.009597 | -0.975467 |
| 6  | 0.119877  | -4.373985 | -2.313394 |
| 1  | -1.726818 | -4.720172 | -1.254828 |
| 1  | -0.361939 | -4.409024 | -0.196429 |
| 6  | -0.904870 | -2.448337 | -3.598593 |
| 1  | -2.809214 | -2.686501 | -2.594918 |
| 1  | -2.083371 | -1.091492 | -2.389664 |
| 6  | -0.492002 | -3.925821 | -3.648054 |
| 1  | 0.375010  | -5.440312 | -2.345523 |
| 1  | 1.059080  | -3.829596 | -2.148259 |
| 1  | -1.372224 | -2.147294 | -4.543695 |
| 1  | -0.006520 | -1.826432 | -3.480952 |
| 1  | 0.216673  | -4.098260 | -4.467177 |
| 1  | -1.377536 | -4.541509 | -3.863321 |
| 6  | -3.356293 | -3.502276 | 0.851313  |
| 6  | -4.177903 | -3.136539 | 2.107378  |
| 6  | -4.299585 | -3.959376 | -0.279558 |
| 1  | -2.688506 | -4.339152 | 1.104178  |
| 6  | -5.075590 | -4.300079 | 2.556718  |
| 1  | -4.797120 | -2.259914 | 1.871533  |
| 1  | -3.521259 | -2.843221 | 2.933193  |
| 6  | -5.178125 | -5.137037 | 0.173152  |
| 1  | -4.942790 | -3.122920 | -0.568711 |
| 1  | -3.733643 | -4.241515 | -1.171633 |
| 6  | -5.992785 | -4.777252 | 1.422819  |
| 1  | -5.668541 | -3.995252 | 3.427570  |
| 1  | -4.441988 | -5.136324 | 2.884804  |



|    |           |           |           |
|----|-----------|-----------|-----------|
| 1  | -5.844140 | -5.437133 | -0.644779 |
| 1  | -4.538947 | -6.004251 | 0.393202  |
| 1  | -6.591798 | -5.635190 | 1.751016  |
| 1  | -6.701489 | -3.975553 | 1.170293  |
| 6  | -1.049247 | -2.051243 | 1.865652  |
| 6  | 0.451803  | -2.129462 | 1.524291  |
| 6  | -1.319343 | -0.814068 | 2.750780  |
| 1  | -1.301293 | -2.952417 | 2.443181  |
| 6  | 1.301634  | -2.165605 | 2.803420  |
| 1  | 0.732349  | -1.255041 | 0.933085  |
| 1  | 0.673759  | -3.013451 | 0.921102  |
| 6  | -0.456104 | -0.827949 | 4.020997  |
| 1  | -1.110836 | 0.083872  | 2.160961  |
| 1  | -2.382659 | -0.759924 | 3.015934  |
| 6  | 1.038594  | -0.937592 | 3.684603  |
| 1  | 2.361564  | -2.228546 | 2.529756  |
| 1  | 1.071662  | -3.080275 | 3.370217  |
| 1  | -0.650013 | 0.078631  | 4.607005  |
| 1  | -0.748578 | -1.680616 | 4.652084  |
| 1  | 1.632140  | -0.991946 | 4.605942  |
| 1  | 1.362390  | -0.033978 | 3.151208  |
| 7  | -2.216100 | 1.404288  | 0.349892  |
| 6  | -3.542351 | 1.937702  | 0.103959  |
| 6  | -3.616149 | 3.363700  | -0.508729 |
| 6  | -5.016636 | 3.898465  | -0.882552 |
| 6  | -2.981404 | 4.364550  | 0.497781  |
| 1  | -3.015350 | 3.351543  | -1.422269 |
| 6  | -5.924032 | 4.133084  | 0.335514  |
| 1  | -5.511182 | 3.265038  | -1.622325 |
| 1  | -4.857204 | 4.864161  | -1.381622 |
| 6  | -3.870453 | 4.647791  | 1.720345  |
| 1  | -2.006818 | 4.007209  | 0.829367  |
| 1  | -2.804394 | 5.304773  | -0.041072 |
| 6  | -5.274299 | 5.118671  | 1.317352  |
| 1  | -6.117180 | 3.181782  | 0.851517  |
| 1  | -6.899943 | 4.508398  | 0.004745  |
| 1  | -3.383306 | 5.398954  | 2.353395  |
| 1  | -3.954117 | 3.742311  | 2.336705  |
| 1  | -5.904834 | 5.251603  | 2.204847  |
| 1  | -5.199181 | 6.102978  | 0.833197  |
| 16 | -1.069822 | 1.452347  | -0.843273 |
| 8  | -0.080243 | 0.402652  | -0.469269 |
| 8  | -1.617786 | 1.402433  | -2.222376 |
| 6  | -0.186074 | 3.001910  | -0.677587 |
| 6  | -0.170595 | 3.912153  | -1.730839 |
| 6  | 0.536663  | 3.240499  | 0.493551  |
| 6  | 0.596035  | 5.072569  | -1.610748 |
| 1  | -0.732205 | 3.699751  | -2.633642 |
| 6  | 1.299500  | 4.397622  | 0.594158  |
| 1  | 0.533734  | 2.521724  | 1.304172  |
| 6  | 1.348722  | 5.326421  | -0.457197 |
| 1  | 0.622145  | 5.781502  | -2.434307 |
| 1  | 1.893386  | 4.560095  | 1.487854  |
| 6  | -4.744392 | 0.930676  | -0.925795 |
| 6  | -4.885354 | -0.557925 | -0.807579 |
| 1  | -5.714835 | -0.898780 | -0.182902 |
| 1  | -4.479711 | 1.267546  | -1.926163 |

|    |           |           |           |
|----|-----------|-----------|-----------|
| 1  | -5.610707 | 1.449065  | -0.525343 |
| 1  | -4.036038 | 1.942371  | 1.079251  |
| 7  | 2.765310  | 0.579976  | -0.046638 |
| 1  | 1.756775  | 0.757179  | 0.011923  |
| 6  | 3.223457  | 0.288088  | -1.431541 |
| 6  | 2.785739  | -1.155295 | -1.787711 |
| 6  | 3.246258  | -1.590381 | -3.197925 |
| 6  | 3.286751  | -2.185199 | -0.749260 |
| 1  | 1.689408  | -1.158580 | -1.762414 |
| 6  | 4.761623  | -1.834109 | -3.285088 |
| 1  | 2.940261  | -0.858364 | -3.948964 |
| 1  | 2.727923  | -2.527813 | -3.443228 |
| 6  | 4.797537  | -2.453798 | -0.832846 |
| 1  | 3.021327  | -1.854417 | 0.256820  |
| 1  | 2.753774  | -3.129074 | -0.926228 |
| 6  | 5.220843  | -2.869174 | -2.248435 |
| 1  | 5.300305  | -0.890236 | -3.122333 |
| 1  | 5.023894  | -2.164534 | -4.297535 |
| 1  | 5.070444  | -3.231071 | -0.108624 |
| 1  | 5.352647  | -1.556852 | -0.534585 |
| 1  | 6.307890  | -3.008809 | -2.299192 |
| 1  | 4.766108  | -3.840959 | -2.490866 |
| 16 | 3.646739  | 1.614804  | 0.910097  |
| 8  | 4.192474  | 2.763377  | 0.164321  |
| 8  | 2.819672  | 1.846854  | 2.107817  |
| 6  | 5.040945  | 0.581104  | 1.355399  |
| 6  | 4.851319  | -0.449189 | 2.279489  |
| 6  | 6.279376  | 0.788452  | 0.751733  |
| 6  | 5.916846  | -1.289353 | 2.582449  |
| 1  | 3.884834  | -0.578579 | 2.752923  |
| 6  | 7.338153  | -0.065876 | 1.065812  |
| 1  | 6.405318  | 1.607147  | 0.051858  |
| 6  | 7.172580  | -1.118460 | 1.974504  |
| 1  | 5.776109  | -2.093246 | 3.300266  |
| 1  | 8.304996  | 0.088097  | 0.594371  |
| 6  | 2.740148  | 1.388374  | -2.359219 |
| 6  | 1.671892  | 1.341747  | -3.154188 |
| 1  | 3.293391  | 2.319891  | -2.259047 |
| 1  | 1.364927  | 2.213174  | -3.724325 |
| 1  | 1.043964  | 0.462696  | -3.252528 |
| 1  | 4.318010  | 0.322720  | -1.402102 |
| 6  | 2.238651  | 6.538547  | -0.349868 |
| 1  | 2.080153  | 7.070369  | 0.594840  |
| 1  | 3.292861  | 6.237086  | -0.375284 |
| 1  | 2.069351  | 7.242785  | -1.169459 |
| 6  | 8.299890  | -2.073359 | 2.277770  |
| 1  | 8.153030  | -3.023481 | 1.749042  |
| 1  | 9.268029  | -1.669686 | 1.968107  |
| 1  | 8.352125  | -2.304002 | 3.346882  |
| 1  | -4.821372 | -1.107419 | -1.748035 |

-----  
**9a**  
-----

Number of imaginary frequencies : 0  
The smallest frequencies are : 13.2904    16.9571    29.2701    cm(-1)

|                                              |                  |              |
|----------------------------------------------|------------------|--------------|
| Electronic energy :                          | HF=-3672.2375879 |              |
| Zero-point correction=                       |                  | 1.227890     |
| (Hartree/Particle)                           |                  |              |
| Thermal correction to Energy=                |                  | 1.290983     |
| Thermal correction to Enthalpy=              |                  | 1.291927     |
| Thermal correction to Gibbs Free Energy=     |                  | 1.128991     |
| Sum of electronic and zero-point Energies=   |                  | -3671.009698 |
| Sum of electronic and thermal Energies=      |                  | -3670.946605 |
| Sum of electronic and thermal Enthalpies=    |                  | -3670.945661 |
| Sum of electronic and thermal Free Energies= |                  | -3671.108597 |

.....  
Cartesian Coordinates  
.....

|    |           |           |           |
|----|-----------|-----------|-----------|
| 28 | 3.453187  | 0.168899  | 0.054718  |
| 15 | 2.457959  | -1.865618 | -0.293599 |
| 6  | 1.446084  | -2.402099 | 1.190627  |
| 6  | 0.997357  | -3.875314 | 1.248747  |
| 6  | 2.110980  | -1.969371 | 2.515347  |
| 1  | 0.553294  | -1.778850 | 1.088644  |
| 6  | 0.043762  | -4.096438 | 2.435954  |
| 1  | 1.864781  | -4.534629 | 1.368424  |
| 1  | 0.507230  | -4.173314 | 0.315257  |
| 6  | 1.153585  | -2.199414 | 3.694379  |
| 1  | 3.036073  | -2.537643 | 2.682800  |
| 1  | 2.387163  | -0.911557 | 2.462849  |
| 6  | 0.681383  | -3.658740 | 3.762167  |
| 1  | -0.257516 | -5.150256 | 2.483054  |
| 1  | -0.870997 | -3.513036 | 2.271262  |
| 1  | 1.637910  | -1.907329 | 4.633898  |
| 1  | 0.283080  | -1.540526 | 3.570084  |
| 1  | -0.029816 | -3.793148 | 4.586381  |
| 1  | 1.542615  | -4.307231 | 3.980122  |
| 6  | 3.496465  | -3.379100 | -0.739535 |
| 6  | 4.295639  | -3.166988 | -2.044275 |
| 6  | 4.424440  | -3.925419 | 0.366111  |
| 1  | 2.746013  | -4.158313 | -0.940039 |
| 6  | 5.000405  | -4.460846 | -2.486124 |
| 1  | 5.040208  | -2.375733 | -1.888764 |
| 1  | 3.643661  | -2.822399 | -2.852753 |
| 6  | 5.092188  | -5.236627 | -0.080698 |
| 1  | 5.208841  | -3.200121 | 0.592463  |
| 1  | 3.873167  | -4.089048 | 1.295412  |
| 6  | 5.889717  | -5.037656 | -1.376684 |
| 1  | 5.590265  | -4.270793 | -3.391038 |
| 1  | 4.237547  | -5.203971 | -2.759258 |
| 1  | 5.745368  | -5.609926 | 0.717238  |
| 1  | 4.320259  | -6.002992 | -0.240809 |
| 1  | 6.338573  | -5.984093 | -1.701122 |
| 1  | 6.721223  | -4.344523 | -1.183415 |
| 6  | 1.277114  | -1.895765 | -1.781806 |
| 6  | -0.227622 | -1.875269 | -1.453791 |
| 6  | 1.610259  | -0.753805 | -2.768214 |
| 1  | 1.480315  | -2.851990 | -2.284516 |
| 6  | -1.064003 | -1.994886 | -2.736368 |
| 1  | -0.476485 | -0.943036 | -0.943245 |
| 1  | -0.492622 | -2.689231 | -0.774453 |
| 6  | 0.760868  | -0.844124 | -4.045479 |

|    |           |           |           |
|----|-----------|-----------|-----------|
| 1  | 1.425513  | 0.198199  | -2.260566 |
| 1  | 2.677369  | -0.764401 | -3.023504 |
| 6  | -0.740909 | -0.865407 | -3.722768 |
| 1  | -2.128318 | -1.989262 | -2.475471 |
| 1  | -0.864759 | -2.966008 | -3.213814 |
| 1  | 0.997630  | -0.001244 | -4.706389 |
| 1  | 1.024393  | -1.759379 | -4.596815 |
| 1  | -1.325419 | -0.980963 | -4.644410 |
| 1  | -1.038891 | 0.092953  | -3.277010 |
| 7  | 1.969996  | 1.387366  | -0.298946 |
| 6  | 3.160778  | 2.105012  | -0.353385 |
| 6  | 3.398104  | 3.440969  | 0.360490  |
| 6  | 4.870029  | 3.877598  | 0.532680  |
| 6  | 2.674777  | 4.567648  | -0.441996 |
| 1  | 2.951776  | 3.380152  | 1.355784  |
| 6  | 5.581382  | 4.166513  | -0.797769 |
| 1  | 5.432855  | 3.159956  | 1.127077  |
| 1  | 4.856786  | 4.807089  | 1.119109  |
| 6  | 3.365692  | 4.909918  | -1.772388 |
| 1  | 1.634788  | 4.300275  | -0.628744 |
| 1  | 2.656749  | 5.464170  | 0.193126  |
| 6  | 4.846740  | 5.264521  | -1.580718 |
| 1  | 5.630354  | 3.252615  | -1.405937 |
| 1  | 6.619234  | 4.464966  | -0.605782 |
| 1  | 2.834897  | 5.741555  | -2.251528 |
| 1  | 3.282173  | 4.060145  | -2.463102 |
| 1  | 5.328925  | 5.436982  | -2.550643 |
| 1  | 4.920384  | 6.207568  | -1.019818 |
| 16 | 0.967966  | 1.479733  | 1.049262  |
| 8  | -0.006881 | 0.375689  | 0.863928  |
| 8  | 1.674799  | 1.539350  | 2.348779  |
| 6  | 0.035389  | 2.988841  | 0.847764  |
| 6  | -0.032383 | 3.903645  | 1.894520  |
| 6  | -0.690952 | 3.175662  | -0.330472 |
| 6  | -0.856485 | 5.021952  | 1.757269  |
| 1  | 0.539884  | 3.731784  | 2.799350  |
| 6  | -1.507186 | 4.293537  | -0.448625 |
| 1  | -0.638671 | 2.454109  | -1.136842 |
| 6  | -1.609600 | 5.228356  | 0.594415  |
| 1  | -0.923099 | 5.737532  | 2.572517  |
| 1  | -2.097486 | 4.419643  | -1.350294 |
| 6  | 5.315163  | 0.720956  | 0.689782  |
| 6  | 5.211042  | -0.660991 | 0.606546  |
| 1  | 5.668424  | -1.193878 | -0.222568 |
| 1  | 5.192255  | 1.217003  | 1.648149  |
| 1  | 5.846273  | 1.282942  | -0.071982 |
| 1  | 3.526248  | 2.115232  | -1.385045 |
| 7  | -2.839528 | 0.468434  | 0.075711  |
| 1  | -1.841076 | 0.691228  | 0.081950  |
| 6  | -3.369458 | 0.162101  | 1.431225  |
| 6  | -2.868609 | -1.245163 | 1.843638  |
| 6  | -3.460415 | -1.707253 | 3.196099  |
| 6  | -3.169560 | -2.311787 | 0.765981  |
| 1  | -1.779219 | -1.170304 | 1.943769  |
| 6  | -4.953131 | -2.066189 | 3.107283  |
| 1  | -3.303222 | -0.948398 | 3.966964  |
| 1  | -2.904439 | -2.599960 | 3.515170  |

|    |           |           |           |
|----|-----------|-----------|-----------|
| 6  | -4.657222 | -2.682046 | 0.670638  |
| 1  | -2.802572 | -1.970871 | -0.203764 |
| 1  | -2.602732 | -3.216615 | 1.022029  |
| 6  | -5.212502 | -3.129347 | 2.030061  |
| 1  | -5.540206 | -1.165888 | 2.878180  |
| 1  | -5.305008 | -2.418335 | 4.084641  |
| 1  | -4.790203 | -3.474129 | -0.076496 |
| 1  | -5.233346 | -1.824403 | 0.306435  |
| 1  | -6.285686 | -3.345247 | 1.954832  |
| 1  | -4.722465 | -4.067402 | 2.329572  |
| 16 | -3.699160 | 1.462580  | -0.946325 |
| 8  | -4.332055 | 2.595917  | -0.247506 |
| 8  | -2.805755 | 1.716218  | -2.090799 |
| 6  | -5.026645 | 0.379687  | -1.466654 |
| 6  | -4.771392 | -0.588300 | -2.440129 |
| 6  | -6.280002 | 0.485072  | -0.865383 |
| 6  | -5.783340 | -1.474884 | -2.792576 |
| 1  | -3.798513 | -0.630744 | -2.916013 |
| 6  | -7.282850 | -0.415001 | -1.228364 |
| 1  | -6.460352 | 1.262451  | -0.131166 |
| 6  | -7.048522 | -1.411531 | -2.184843 |
| 1  | -5.592197 | -2.230943 | -3.549540 |
| 1  | -8.260246 | -0.341715 | -0.759369 |
| 6  | -3.024174 | 1.303384  | 2.371507  |
| 6  | -2.040418 | 1.324508  | 3.270103  |
| 1  | -3.606823 | 2.205259  | 2.195950  |
| 1  | -1.834286 | 2.222188  | 3.845700  |
| 1  | -1.391168 | 0.475246  | 3.455496  |
| 1  | -4.458982 | 0.124998  | 1.326193  |
| 6  | -2.549874 | 6.399124  | 0.464099  |
| 1  | -2.379649 | 6.946956  | -0.469371 |
| 1  | -3.589080 | 6.049345  | 0.445344  |
| 1  | -2.444546 | 7.102348  | 1.295101  |
| 6  | -8.115151 | -2.416943 | -2.538978 |
| 1  | -7.941464 | -3.363707 | -2.012138 |
| 1  | -9.112632 | -2.064411 | -2.261472 |
| 1  | -8.116715 | -2.639013 | -3.610960 |
| 1  | 5.041098  | -1.247688 | 1.505510  |

-----

10

-----

Number of imaginary frequencies : 0  
The smallest frequencies are : 12.9225 16.2535 26.5119 cm(-1)

Electronic energy : HF=-2676.3238494  
Zero-point correction= 0.938018  
(Hartree/Particle)  
Thermal correction to Energy= 0.984477  
Thermal correction to Enthalpy= 0.985421  
Thermal correction to Gibbs Free Energy= 0.857416  
Sum of electronic and zero-point Energies= -2675.385832  
Sum of electronic and thermal Energies= -2675.339372  
Sum of electronic and thermal Enthalpies= -2675.338428  
Sum of electronic and thermal Free Energies= -2675.466433

.....  
Cartesian Coordinates

|    |           |           |           |
|----|-----------|-----------|-----------|
| 28 | 0.142713  | -0.932534 | 0.438385  |
| 15 | 1.755631  | 0.732446  | 0.352366  |
| 6  | 3.114364  | 0.187239  | 1.535906  |
| 6  | 4.330790  | 1.113911  | 1.722410  |
| 6  | 2.536296  | -0.188574 | 2.917610  |
| 1  | 3.476060  | -0.738322 | 1.070794  |
| 6  | 5.406274  | 0.425972  | 2.581717  |
| 1  | 4.013779  | 2.037055  | 2.224051  |
| 1  | 4.759371  | 1.404980  | 0.757899  |
| 6  | 3.596974  | -0.880527 | 3.788488  |
| 1  | 2.194443  | 0.720564  | 3.430504  |
| 1  | 1.653990  | -0.828871 | 2.804201  |
| 6  | 4.848766  | -0.004586 | 3.946141  |
| 1  | 6.263251  | 1.097193  | 2.715771  |
| 1  | 5.780622  | -0.457553 | 2.045227  |
| 1  | 3.176207  | -1.125842 | 4.771143  |
| 1  | 3.877410  | -1.834681 | 3.319180  |
| 1  | 5.616296  | -0.535159 | 4.522273  |
| 1  | 4.586091  | 0.893023  | 4.524258  |
| 6  | 1.260845  | 2.418450  | 1.086940  |
| 6  | 2.129637  | 3.620276  | 0.652649  |
| 6  | -0.230470 | 2.771471  | 0.919508  |
| 1  | 1.432869  | 2.262944  | 2.161449  |
| 6  | 1.770960  | 4.883272  | 1.453397  |
| 1  | 1.959181  | 3.822988  | -0.411692 |
| 1  | 3.195390  | 3.407715  | 0.766099  |
| 6  | -0.594321 | 4.044516  | 1.700054  |
| 1  | -0.457011 | 2.905315  | -0.145465 |
| 1  | -0.852331 | 1.935762  | 1.239402  |
| 6  | 0.285861  | 5.236048  | 1.303750  |
| 1  | 2.400865  | 5.719046  | 1.124421  |
| 1  | 2.000641  | 4.715605  | 2.515840  |
| 1  | -1.654104 | 4.283621  | 1.545205  |
| 1  | -0.473516 | 3.852665  | 2.776836  |
| 1  | 0.038372  | 6.119054  | 1.905789  |
| 1  | 0.084628  | 5.500279  | 0.255823  |
| 6  | 2.711335  | 1.190837  | -1.203558 |
| 6  | 3.657255  | 0.091947  | -1.719948 |
| 6  | 1.768386  | 1.638776  | -2.336723 |
| 1  | 3.334593  | 2.047070  | -0.921204 |
| 6  | 4.468065  | 0.592798  | -2.926415 |
| 1  | 3.071017  | -0.774085 | -2.029436 |
| 1  | 4.341120  | -0.249392 | -0.936501 |
| 6  | 2.567121  | 2.138948  | -3.550258 |
| 1  | 1.136079  | 0.795881  | -2.632374 |
| 1  | 1.077116  | 2.412978  | -1.993219 |
| 6  | 3.545874  | 1.070701  | -4.056206 |
| 1  | 5.124440  | -0.210654 | -3.282131 |
| 1  | 5.121295  | 1.420512  | -2.612304 |
| 1  | 1.876301  | 2.434720  | -4.348945 |
| 1  | 3.130254  | 3.041696  | -3.269867 |
| 1  | 4.136091  | 1.455295  | -4.897131 |
| 1  | 2.974840  | 0.211465  | -4.434241 |
| 7  | -1.534329 | 0.058866  | 0.238838  |
| 6  | -1.793242 | -1.036933 | 1.033102  |
| 6  | -2.984431 | -1.982789 | 0.867719  |

|    |           |           |           |
|----|-----------|-----------|-----------|
| 6  | -2.911207 | -3.323778 | 1.634083  |
| 6  | -4.259704 | -1.235812 | 1.375173  |
| 1  | -3.105029 | -2.203223 | -0.195243 |
| 6  | -2.889483 | -3.152760 | 3.160375  |
| 1  | -2.073702 | -3.934537 | 1.301204  |
| 1  | -3.816128 | -3.887675 | 1.367342  |
| 6  | -4.299921 | -1.062690 | 2.902779  |
| 1  | -4.350700 | -0.260590 | 0.896251  |
| 1  | -5.131507 | -1.824274 | 1.058460  |
| 6  | -4.137242 | -2.397814 | 3.642544  |
| 1  | -1.986433 | -2.605870 | 3.464912  |
| 1  | -2.831009 | -4.136384 | 3.642194  |
| 1  | -5.245790 | -0.585126 | 3.185638  |
| 1  | -3.506632 | -0.372079 | 3.218419  |
| 1  | -4.095945 | -2.233226 | 4.726108  |
| 1  | -5.021644 | -3.022676 | 3.451982  |
| 16 | -1.966411 | 0.087754  | -1.396299 |
| 8  | -1.218198 | 1.216345  | -1.973189 |
| 8  | -1.874658 | -1.234868 | -2.060077 |
| 6  | -3.692032 | 0.571012  | -1.382615 |
| 6  | -4.659771 | -0.286718 | -1.899891 |
| 6  | -4.038494 | 1.814806  | -0.847362 |
| 6  | -5.998960 | 0.102175  | -1.861682 |
| 1  | -4.362392 | -1.243842 | -2.313929 |
| 6  | -5.379625 | 2.183204  | -0.810304 |
| 1  | -3.268413 | 2.472508  | -0.458597 |
| 6  | -6.379699 | 1.334131  | -1.313747 |
| 1  | -6.759549 | -0.564193 | -2.259849 |
| 1  | -5.659609 | 3.144019  | -0.386043 |
| 6  | 0.145362  | -2.919853 | 0.838602  |
| 6  | 1.443442  | -2.531939 | 0.495076  |
| 1  | 2.163404  | -2.419929 | 1.301898  |
| 6  | 2.036669  | -2.825086 | -0.830619 |
| 6  | 1.287485  | -2.740900 | -2.020118 |
| 6  | 3.386328  | -3.204413 | -0.915048 |
| 6  | 1.880365  | -3.020914 | -3.250113 |
| 1  | 0.252955  | -2.409465 | -1.983479 |
| 6  | 3.976446  | -3.488671 | -2.147125 |
| 1  | 3.977536  | -3.269621 | -0.004508 |
| 6  | 3.226539  | -3.395044 | -3.321659 |
| 1  | 1.291055  | -2.931554 | -4.158624 |
| 1  | 5.023363  | -3.776928 | -2.190249 |
| 1  | 3.686314  | -3.605653 | -4.283035 |
| 1  | -0.467248 | -3.449942 | 0.115392  |
| 1  | -0.101275 | -3.093404 | 1.881955  |
| 1  | -1.611935 | -0.779301 | 2.081600  |
| 6  | -7.826360 | 1.760675  | -1.292663 |
| 1  | -8.046940 | 2.430912  | -2.133016 |
| 1  | -8.501258 | 0.903441  | -1.371383 |
| 1  | -8.070703 | 2.303854  | -0.374096 |

-----  
**TS[10-11]**  
-----

Number of imaginary frequencies : 1

The smallest frequencies are : -178.4605    20.4007    25.5438    cm(-1)

|                                              |                  |              |
|----------------------------------------------|------------------|--------------|
| Electronic energy :                          | HF=-2676.3119415 |              |
| Zero-point correction=                       |                  | 0.938591     |
| (Hartree/Particle)                           |                  |              |
| Thermal correction to Energy=                |                  | 0.983923     |
| Thermal correction to Enthalpy=              |                  | 0.984867     |
| Thermal correction to Gibbs Free Energy=     |                  | 0.860507     |
| Sum of electronic and zero-point Energies=   |                  | -2675.373351 |
| Sum of electronic and thermal Energies=      |                  | -2675.328019 |
| Sum of electronic and thermal Enthalpies=    |                  | -2675.327074 |
| Sum of electronic and thermal Free Energies= |                  | -2675.451434 |

.....  
Cartesian Coordinates  
.....

|    |           |           |           |
|----|-----------|-----------|-----------|
| 28 | 0.258088  | -0.667165 | 0.337281  |
| 15 | 1.911308  | 0.753065  | 0.369136  |
| 6  | 3.255382  | 0.040580  | 1.459232  |
| 6  | 4.551696  | 0.860953  | 1.602016  |
| 6  | 2.717008  | -0.331944 | 2.856672  |
| 1  | 3.496576  | -0.898988 | 0.943840  |
| 6  | 5.609888  | 0.068502  | 2.389046  |
| 1  | 4.332986  | 1.792283  | 2.139732  |
| 1  | 4.951431  | 1.145244  | 0.623123  |
| 6  | 3.763839  | -1.128412 | 3.651604  |
| 1  | 2.471911  | 0.583729  | 3.411892  |
| 1  | 1.786408  | -0.902783 | 2.766081  |
| 6  | 5.085139  | -0.354120 | 3.768975  |
| 1  | 6.523030  | 0.666599  | 2.495029  |
| 1  | 5.884875  | -0.827047 | 1.814006  |
| 1  | 3.374171  | -1.371817 | 4.647438  |
| 1  | 3.947035  | -2.085317 | 3.142173  |
| 1  | 5.835377  | -0.957037 | 4.294349  |
| 1  | 4.919457  | 0.544798  | 4.380146  |
| 6  | 1.496015  | 2.415618  | 1.166799  |
| 6  | 2.394604  | 3.598569  | 0.747038  |
| 6  | 0.008208  | 2.793863  | 1.014039  |
| 1  | 1.673970  | 2.226079  | 2.235137  |
| 6  | 2.059549  | 4.860362  | 1.559840  |
| 1  | 2.234784  | 3.815009  | -0.316444 |
| 1  | 3.454616  | 3.354661  | 0.864518  |
| 6  | -0.325068 | 4.064863  | 1.809292  |
| 1  | -0.225936 | 2.940392  | -0.046418 |
| 1  | -0.626310 | 1.963248  | 1.330068  |
| 6  | 0.579812  | 5.240281  | 1.416989  |
| 1  | 2.702954  | 5.688226  | 1.237420  |
| 1  | 2.288132  | 4.678684  | 2.620104  |
| 1  | -1.379692 | 4.327979  | 1.660071  |
| 1  | -0.203342 | 3.861559  | 2.883845  |
| 1  | 0.351813  | 6.124305  | 2.025019  |
| 1  | 0.379974  | 5.514603  | 0.371448  |
| 6  | 2.776685  | 1.171591  | -1.238179 |
| 6  | 3.625053  | 0.016772  | -1.803872 |
| 6  | 1.758653  | 1.645335  | -2.294656 |
| 1  | 3.454881  | 2.002533  | -1.008174 |
| 6  | 4.336912  | 0.443028  | -3.097602 |
| 1  | 2.976961  | -0.832893 | -2.022913 |
| 1  | 4.366574  | -0.328268 | -1.076988 |
| 6  | 2.462582  | 2.065848  | -3.593242 |



|    |           |           |           |
|----|-----------|-----------|-----------|
| 1  | 1.056170  | 0.831669  | -2.501339 |
| 1  | 1.146393  | 2.466916  | -1.913203 |
| 6  | 3.334118  | 0.932164  | -4.150813 |
| 1  | 4.919283  | -0.401251 | -3.485236 |
| 1  | 5.052990  | 1.247772  | -2.874255 |
| 1  | 1.713092  | 2.372728  | -4.332399 |
| 1  | 3.092701  | 2.946608  | -3.398587 |
| 1  | 3.858449  | 1.259451  | -5.056991 |
| 1  | 2.687527  | 0.092861  | -4.441396 |
| 7  | -1.573807 | 0.033804  | 0.329083  |
| 6  | -1.722171 | -1.251209 | 0.950505  |
| 6  | -3.081873 | -1.984366 | 0.800767  |
| 6  | -3.187282 | -3.409271 | 1.391791  |
| 6  | -4.176289 | -1.115166 | 1.485258  |
| 1  | -3.296997 | -2.052624 | -0.268300 |
| 6  | -3.060823 | -3.445461 | 2.923089  |
| 1  | -2.482135 | -4.099021 | 0.923861  |
| 1  | -4.184709 | -3.782782 | 1.122964  |
| 6  | -4.105201 | -1.141162 | 3.021028  |
| 1  | -4.122783 | -0.084854 | 1.135695  |
| 1  | -5.151818 | -1.504471 | 1.165497  |
| 6  | -4.138467 | -2.570511 | 3.579299  |
| 1  | -2.066811 | -3.090041 | 3.230066  |
| 1  | -3.140148 | -4.479998 | 3.277354  |
| 1  | -4.936437 | -0.554108 | 3.429774  |
| 1  | -3.187876 | -0.639801 | 3.358019  |
| 1  | -4.017252 | -2.560534 | 4.669295  |
| 1  | -5.124145 | -3.013129 | 3.375793  |
| 16 | -2.019144 | 0.244473  | -1.263328 |
| 8  | -1.299486 | 1.440928  | -1.738682 |
| 8  | -1.920744 | -1.004146 | -2.063880 |
| 6  | -3.755724 | 0.711634  | -1.239690 |
| 6  | -4.715046 | -0.124749 | -1.805456 |
| 6  | -4.119285 | 1.929069  | -0.657443 |
| 6  | -6.057801 | 0.253140  | -1.765180 |
| 1  | -4.406306 | -1.052726 | -2.274070 |
| 6  | -5.462931 | 2.289405  | -0.620744 |
| 1  | -3.357772 | 2.579782  | -0.240858 |
| 6  | -6.453582 | 1.455728  | -1.165441 |
| 1  | -6.808334 | -0.396545 | -2.208061 |
| 1  | -5.751136 | 3.233741  | -0.165996 |
| 6  | -0.441124 | -2.632582 | 0.537536  |
| 6  | 1.024802  | -2.406294 | 0.392124  |
| 1  | 1.602755  | -2.639071 | 1.288426  |
| 6  | 1.713366  | -2.804287 | -0.857211 |
| 6  | 1.105625  | -2.667324 | -2.123364 |
| 6  | 3.032585  | -3.290732 | -0.806565 |
| 6  | 1.801962  | -2.994460 | -3.285315 |
| 1  | 0.099835  | -2.262164 | -2.194796 |
| 6  | 3.728780  | -3.612809 | -1.971875 |
| 1  | 3.516700  | -3.407719 | 0.160663  |
| 6  | 3.117954  | -3.465214 | -3.219361 |
| 1  | 1.317304  | -2.868124 | -4.249843 |
| 1  | 4.749673  | -3.979943 | -1.905393 |
| 1  | 3.658857  | -3.712555 | -4.128236 |
| 1  | -0.920022 | -3.077653 | -0.331103 |
| 1  | -0.662760 | -3.163937 | 1.457017  |

|   |           |           |           |
|---|-----------|-----------|-----------|
| 1 | -1.511183 | -1.097887 | 2.011800  |
| 6 | -7.910785 | 1.838588  | -1.083518 |
| 1 | -8.348736 | 1.507311  | -0.133309 |
| 1 | -8.045216 | 2.923321  | -1.140520 |
| 1 | -8.493711 | 1.380271  | -1.888081 |

-----  
**11**  
 -----

Number of imaginary frequencies : 0  
 The smallest frequencies are : 13.4238 16.7483 25.7968 cm(-1)

Electronic energy : HF=-2676.353401  
 Zero-point correction= 0.940265  
 (Hartree/Particle)  
 Thermal correction to Energy= 0.986002  
 Thermal correction to Enthalpy= 0.986947  
 Thermal correction to Gibbs Free Energy= 0.859939  
 Sum of electronic and zero-point Energies= -2675.413136  
 Sum of electronic and thermal Energies= -2675.367399  
 Sum of electronic and thermal Enthalpies= -2675.366454  
 Sum of electronic and thermal Free Energies= -2675.493462

.....  
 Cartesian Coordinates  
 .....

|    |           |           |           |
|----|-----------|-----------|-----------|
| 28 | -0.124432 | -0.257544 | -0.004782 |
| 15 | -2.115107 | 0.708979  | -0.365135 |
| 6  | -3.327421 | -0.151865 | -1.488401 |
| 6  | -4.607583 | 0.640188  | -1.817514 |
| 6  | -2.650916 | -0.641227 | -2.786032 |
| 1  | -3.611918 | -1.041579 | -0.914089 |
| 6  | -5.579708 | -0.217494 | -2.645053 |
| 1  | -4.342885 | 1.536462  | -2.393721 |
| 1  | -5.100356 | 0.985632  | -0.902603 |
| 6  | -3.619291 | -1.499399 | -3.615517 |
| 1  | -2.335872 | 0.222215  | -3.388179 |
| 1  | -1.742744 | -1.204421 | -2.552909 |
| 6  | -4.916582 | -0.739838 | -3.927594 |
| 1  | -6.477128 | 0.364103  | -2.887965 |
| 1  | -5.912000 | -1.068947 | -2.034265 |
| 1  | -3.131844 | -1.822827 | -4.542870 |
| 1  | -3.860772 | -2.412018 | -3.051836 |
| 1  | -5.611802 | -1.382639 | -4.480547 |
| 1  | -4.684750 | 0.111091  | -4.584225 |
| 6  | -1.722083 | 2.327816  | -1.269138 |
| 6  | -2.622668 | 3.526706  | -0.911845 |
| 6  | -0.229569 | 2.709814  | -1.142014 |
| 1  | -1.902731 | 2.078959  | -2.323789 |
| 6  | -2.277323 | 4.756215  | -1.768097 |
| 1  | -2.484698 | 3.785768  | 0.145023  |
| 1  | -3.678691 | 3.269199  | -1.039195 |
| 6  | 0.108496  | 3.953538  | -1.978192 |
| 1  | 0.017837  | 2.887204  | -0.089211 |
| 1  | 0.399857  | 1.871074  | -1.464337 |
| 6  | -0.798347 | 5.139354  | -1.624506 |
| 1  | -2.922061 | 5.596659  | -1.483988 |
| 1  | -2.494391 | 4.535147  | -2.823043 |

|    |           |           |           |
|----|-----------|-----------|-----------|
| 1  | 1.162776  | 4.220409  | -1.834250 |
| 1  | -0.011513 | 3.713506  | -3.044673 |
| 1  | -0.563910 | 6.003847  | -2.257124 |
| 1  | -0.604697 | 5.444505  | -0.586371 |
| 6  | -3.086933 | 1.184984  | 1.161477  |
| 6  | -3.900647 | 0.000239  | 1.718512  |
| 6  | -2.106100 | 1.722837  | 2.226854  |
| 1  | -3.788590 | 1.983414  | 0.889835  |
| 6  | -4.613285 | 0.374138  | 3.027483  |
| 1  | -3.231548 | -0.842746 | 1.905218  |
| 1  | -4.641484 | -0.340071 | 0.988010  |
| 6  | -2.831392 | 2.093714  | 3.528003  |
| 1  | -1.348368 | 0.957995  | 2.431220  |
| 1  | -1.553843 | 2.587589  | 1.842372  |
| 6  | -3.626618 | 0.901549  | 4.077163  |
| 1  | -5.148911 | -0.502739 | 3.410399  |
| 1  | -5.371489 | 1.144536  | 2.824282  |
| 1  | -2.101596 | 2.442976  | 4.267931  |
| 1  | -3.517589 | 2.932566  | 3.339793  |
| 1  | -4.157850 | 1.182838  | 4.994525  |
| 1  | -2.927209 | 0.098140  | 4.346646  |
| 7  | 1.748828  | -0.539910 | -0.113671 |
| 6  | 2.108271  | -1.929758 | -0.508220 |
| 6  | 3.575635  | -2.327976 | -0.236477 |
| 6  | 3.851800  | -3.822266 | -0.518826 |
| 6  | 4.563756  | -1.471198 | -1.063948 |
| 1  | 3.764922  | -2.154303 | 0.829152  |
| 6  | 3.777281  | -4.165428 | -2.014905 |
| 1  | 3.172670  | -4.457276 | 0.059071  |
| 1  | 4.864797  | -4.051170 | -0.159368 |
| 6  | 4.538621  | -1.806473 | -2.564895 |
| 1  | 4.358890  | -0.408031 | -0.921275 |
| 1  | 5.576785  | -1.648416 | -0.677627 |
| 6  | 4.760293  | -3.304574 | -2.823638 |
| 1  | 2.755413  | -4.000921 | -2.383294 |
| 1  | 3.992321  | -5.230343 | -2.165805 |
| 1  | 5.301939  | -1.215124 | -3.085536 |
| 1  | 3.574674  | -1.502750 | -2.994532 |
| 1  | 4.673422  | -3.524764 | -3.894998 |
| 1  | 5.786494  | -3.571119 | -2.530873 |
| 16 | 2.132406  | 0.132561  | 1.316055  |
| 8  | 1.020039  | 1.140868  | 1.463201  |
| 8  | 2.382416  | -0.782874 | 2.452255  |
| 6  | 3.625409  | 1.096049  | 1.079855  |
| 6  | 4.785230  | 0.779933  | 1.781559  |
| 6  | 3.607266  | 2.140817  | 0.149679  |
| 6  | 5.946729  | 1.517340  | 1.541522  |
| 1  | 4.771184  | -0.030908 | 2.501535  |
| 6  | 4.771644  | 2.864615  | -0.077530 |
| 1  | 2.692135  | 2.371615  | -0.385448 |
| 6  | 5.959668  | 2.564141  | 0.612535  |
| 1  | 6.854566  | 1.274578  | 2.087393  |
| 1  | 4.765187  | 3.678056  | -0.798940 |
| 6  | 1.027858  | -2.818829 | 0.103687  |
| 6  | -0.358420 | -2.186735 | -0.177394 |
| 1  | -0.643243 | -2.387687 | -1.217676 |
| 6  | -1.428553 | -2.655932 | 0.749533  |

|   |           |           |           |
|---|-----------|-----------|-----------|
| 6 | -1.261719 | -2.583582 | 2.149012  |
| 6 | -2.633951 | -3.195417 | 0.264767  |
| 6 | -2.251245 | -3.039194 | 3.017559  |
| 1 | -0.351800 | -2.144409 | 2.548694  |
| 6 | -3.632243 | -3.641534 | 1.133314  |
| 1 | -2.778665 | -3.278303 | -0.809689 |
| 6 | -3.445208 | -3.569060 | 2.515112  |
| 1 | -2.096471 | -2.970081 | 4.091008  |
| 1 | -4.552867 | -4.054483 | 0.729020  |
| 1 | -4.218122 | -3.919125 | 3.193250  |
| 1 | 1.210463  | -2.884076 | 1.180180  |
| 1 | 1.055641  | -3.842316 | -0.295934 |
| 1 | 1.946505  | -1.919903 | -1.592539 |
| 6 | 7.218438  | 3.347289  | 0.332390  |
| 1 | 7.028207  | 4.426043  | 0.350991  |
| 1 | 8.001847  | 3.129175  | 1.063521  |
| 1 | 7.615097  | 3.108241  | -0.661947 |

-----  
**10a**  
 -----

Number of imaginary frequencies : 0  
 The smallest frequencies are : 15.2974    20.4714    24.9707    cm(-1)

Electronic energy :                    HF=-3903.318498  
 Zero-point correction=                    1.310186  
 (Hartree/Particle)  
 Thermal correction to Energy=            1.377836  
 Thermal correction to Enthalpy=         1.378781  
 Thermal correction to Gibbs Free Energy= 1.205543  
 Sum of electronic and zero-point Energies=         -3902.008312  
 Sum of electronic and thermal Energies=         -3901.940662  
 Sum of electronic and thermal Enthalpies=         -3901.939717  
 Sum of electronic and thermal Free Energies=        -3902.112955

.....  
 Cartesian Coordinates  
 .....

|    |           |           |           |
|----|-----------|-----------|-----------|
| 28 | -2.949721 | 0.321615  | 0.745083  |
| 15 | -1.970697 | -1.777550 | 0.771490  |
| 6  | -1.189193 | -2.300178 | -0.849938 |
| 6  | -0.767633 | -3.776311 | -0.996140 |
| 6  | -2.052280 | -1.844826 | -2.046330 |
| 1  | -0.284754 | -1.685973 | -0.874774 |
| 6  | -0.021255 | -3.988718 | -2.324626 |
| 1  | -1.646519 | -4.430222 | -0.983126 |
| 1  | -0.136414 | -4.091811 | -0.158760 |
| 6  | -1.315198 | -2.082719 | -3.371975 |
| 1  | -3.008332 | -2.382779 | -2.058524 |
| 1  | -2.289694 | -0.783650 | -1.947439 |
| 6  | -0.870114 | -3.543646 | -3.524183 |
| 1  | 0.268026  | -5.042076 | -2.426627 |
| 1  | 0.908448  | -3.405061 | -2.309146 |
| 1  | -1.957776 | -1.785030 | -4.209189 |
| 1  | -0.432025 | -1.429844 | -3.405158 |
| 1  | -0.307910 | -3.678552 | -4.456519 |
| 1  | -1.758759 | -4.187807 | -3.595719 |

|    |           |           |           |
|----|-----------|-----------|-----------|
| 6  | -2.975888 | -3.282291 | 1.322554  |
| 6  | -3.616064 | -3.061243 | 2.711730  |
| 6  | -4.022451 | -3.799462 | 0.315249  |
| 1  | -2.221356 | -4.075027 | 1.434058  |
| 6  | -4.327001 | -4.327838 | 3.216204  |
| 1  | -4.342571 | -2.240068 | 2.659642  |
| 1  | -2.860415 | -2.754204 | 3.441409  |
| 6  | -4.716339 | -5.069784 | 0.833448  |
| 1  | -4.779690 | -3.036613 | 0.128183  |
| 1  | -3.562149 | -4.003229 | -0.653279 |
| 6  | -5.362453 | -4.835727 | 2.204820  |
| 1  | -4.801516 | -4.125101 | 4.183892  |
| 1  | -3.578157 | -5.113314 | 3.391491  |
| 1  | -5.467001 | -5.402009 | 0.106093  |
| 1  | -3.977193 | -5.879703 | 0.914700  |
| 1  | -5.834047 | -5.755733 | 2.570046  |
| 1  | -6.164312 | -4.089852 | 2.103250  |
| 6  | -0.610243 | -1.868806 | 2.098397  |
| 6  | 0.842685  | -1.927181 | 1.589561  |
| 6  | -0.760396 | -0.713599 | 3.112742  |
| 1  | -0.799660 | -2.812524 | 2.629387  |
| 6  | 1.822899  | -2.089477 | 2.762029  |
| 1  | 1.074264  | -1.008787 | 1.048334  |
| 1  | 0.983029  | -2.752610 | 0.887829  |
| 6  | 0.231651  | -0.851060 | 4.278212  |
| 1  | -0.589247 | 0.229707  | 2.584998  |
| 1  | -1.789222 | -0.668290 | 3.493002  |
| 6  | 1.679388  | -0.945165 | 3.773069  |
| 1  | 2.846129  | -2.137540 | 2.372636  |
| 1  | 1.635490  | -3.048933 | 3.266993  |
| 1  | 0.119722  | -0.000204 | 4.961404  |
| 1  | -0.007591 | -1.754770 | 4.859016  |
| 1  | 2.366998  | -1.088447 | 4.616518  |
| 1  | 1.964961  | -0.001742 | 3.288752  |
| 7  | -1.411072 | 1.493590  | 0.764381  |
| 6  | -2.550192 | 2.273810  | 0.953986  |
| 6  | -2.897225 | 3.508712  | 0.108680  |
| 6  | -4.392699 | 3.875742  | -0.001430 |
| 6  | -2.141196 | 4.746808  | 0.683295  |
| 1  | -2.539991 | 3.331662  | -0.907463 |
| 6  | -5.004873 | 4.372731  | 1.317423  |
| 1  | -4.965443 | 3.045343  | -0.420724 |
| 1  | -4.468943 | 4.688736  | -0.737273 |
| 6  | -2.746741 | 5.282028  | 1.990500  |
| 1  | -1.085706 | 4.514154  | 0.834795  |
| 1  | -2.178861 | 5.539176  | -0.077204 |
| 6  | -4.241781 | 5.595490  | 1.845495  |
| 1  | -4.972977 | 3.577955  | 2.074441  |
| 1  | -6.063605 | 4.616369  | 1.166278  |
| 1  | -2.196821 | 6.177704  | 2.303561  |
| 1  | -2.608498 | 4.544886  | 2.793022  |
| 1  | -4.659769 | 5.926088  | 2.804156  |
| 1  | -4.369910 | 6.429409  | 1.140358  |
| 16 | -0.560333 | 1.504969  | -0.675748 |
| 8  | 0.412810  | 0.391067  | -0.552472 |
| 8  | -1.386441 | 1.533131  | -1.904944 |
| 6  | 0.405166  | 3.005707  | -0.619688 |

|    |           |           |           |
|----|-----------|-----------|-----------|
| 6  | 0.342909  | 3.908441  | -1.677130 |
| 6  | 1.280878  | 3.196920  | 0.451334  |
| 6  | 1.188516  | 5.018846  | -1.663456 |
| 1  | -0.345397 | 3.731803  | -2.495940 |
| 6  | 2.122652  | 4.302259  | 0.442774  |
| 1  | 1.328231  | 2.484330  | 1.266142  |
| 6  | 2.096818  | 5.223442  | -0.616927 |
| 1  | 1.152973  | 5.725912  | -2.487976 |
| 1  | 2.832219  | 4.429449  | 1.253900  |
| 6  | -4.870606 | 0.773139  | 1.301231  |
| 6  | -4.899252 | -0.357235 | 0.493479  |
| 1  | -5.006470 | -1.315923 | 0.984219  |
| 6  | -5.256070 | -0.352362 | -0.948273 |
| 6  | -4.712939 | 0.576284  | -1.854541 |
| 6  | -6.145096 | -1.321158 | -1.445432 |
| 6  | -5.047236 | 0.534345  | -3.207262 |
| 1  | -3.982749 | 1.300285  | -1.511162 |
| 6  | -6.483243 | -1.360253 | -2.798205 |
| 1  | -6.585022 | -2.043136 | -0.762290 |
| 6  | -5.933417 | -0.433183 | -3.686561 |
| 1  | -4.597354 | 1.250379  | -3.889225 |
| 1  | -7.175203 | -2.116803 | -3.158166 |
| 1  | -6.188831 | -0.468137 | -4.741818 |
| 1  | -5.213801 | 1.724177  | 0.928533  |
| 1  | -4.875642 | 0.661657  | 2.384691  |
| 1  | -2.704301 | 2.444032  | 2.022221  |
| 7  | 3.302099  | 0.426503  | -0.212029 |
| 1  | 2.315501  | 0.669776  | -0.088795 |
| 6  | 3.653062  | 0.126389  | -1.625292 |
| 6  | 3.055477  | -1.256271 | -1.991401 |
| 6  | 3.441128  | -1.707902 | -3.419007 |
| 6  | 3.464255  | -2.354642 | -0.983121 |
| 1  | 1.965783  | -1.146249 | -1.940776 |
| 6  | 4.919286  | -2.113521 | -3.541645 |
| 1  | 3.204463  | -0.929402 | -4.148556 |
| 1  | 2.818551  | -2.576926 | -3.673567 |
| 6  | 4.939321  | -2.769379 | -1.097483 |
| 1  | 3.243557  | -2.023467 | 0.033327  |
| 1  | 2.837856  | -3.236203 | -1.174998 |
| 6  | 5.290195  | -3.204722 | -2.526868 |
| 1  | 5.560652  | -1.235793 | -3.381904 |
| 1  | 5.123034  | -2.456916 | -4.563262 |
| 1  | 5.148442  | -3.579767 | -0.388539 |
| 1  | 5.585550  | -1.934990 | -0.801374 |
| 1  | 6.356380  | -3.452485 | -2.602947 |
| 1  | 4.735229  | -4.122405 | -2.771080 |
| 16 | 4.306869  | 1.380234  | 0.708682  |
| 8  | 4.902441  | 2.490879  | -0.056421 |
| 8  | 3.556317  | 1.663684  | 1.945048  |
| 6  | 5.636824  | 0.240909  | 1.081794  |
| 6  | 5.436986  | -0.735294 | 2.061271  |
| 6  | 6.828176  | 0.307448  | 0.362689  |
| 6  | 6.440318  | -1.667384 | 2.299374  |
| 1  | 4.512227  | -0.750340 | 2.626360  |
| 6  | 7.824215  | -0.638837 | 0.612636  |
| 1  | 6.967522  | 1.088700  | -0.376391 |
| 6  | 7.643757  | -1.641513 | 1.573169  |

|   |          |           |           |
|---|----------|-----------|-----------|
| 1 | 6.291879 | -2.430769 | 3.058792  |
| 1 | 8.753734 | -0.595530 | 0.051791  |
| 6 | 3.237033 | 1.293821  | -2.503347 |
| 6 | 2.139933 | 1.369567  | -3.256074 |
| 1 | 3.879706 | 2.166031  | -2.404783 |
| 1 | 1.897804 | 2.280856  | -3.794737 |
| 1 | 1.434259 | 0.551475  | -3.354718 |
| 1 | 4.745383 | 0.051076  | -1.654569 |
| 6 | 3.051312 | 6.390412  | -0.619534 |
| 1 | 2.881850 | 7.053523  | -1.472389 |
| 1 | 2.955097 | 6.983249  | 0.296996  |
| 1 | 4.087705 | 6.035671  | -0.664963 |
| 6 | 8.705736 | -2.681619 | 1.829321  |
| 1 | 8.977598 | -2.718273 | 2.890184  |
| 1 | 8.347881 | -3.681133 | 1.554859  |
| 1 | 9.614312 | -2.483050 | 1.254272  |

-----  
**TS[10a-11a]**  
 -----

Number of imaginary frequencies : 1  
 The smallest frequencies are : -167.2310 14.7866 21.6184 cm(-1)

Electronic energy : HF=-3903.3005153  
 Zero-point correction= 1.310214  
 (Hartree/Particle)  
 Thermal correction to Energy= 1.376874  
 Thermal correction to Enthalpy= 1.377818  
 Thermal correction to Gibbs Free Energy= 1.206593  
 Sum of electronic and zero-point Energies= -3901.990301  
 Sum of electronic and thermal Energies= -3901.923642  
 Sum of electronic and thermal Enthalpies= -3901.922697  
 Sum of electronic and thermal Free Energies= -3902.093922

.....  
 Cartesian Coordinates  
 .....

|    |           |           |           |
|----|-----------|-----------|-----------|
| 28 | -2.865364 | 0.295484  | 0.450853  |
| 15 | -1.995472 | -1.639268 | 0.983453  |
| 6  | -1.135455 | -2.496533 | -0.444711 |
| 6  | -0.895378 | -4.009148 | -0.265554 |
| 6  | -1.814831 | -2.183080 | -1.791037 |
| 1  | -0.167023 | -1.988292 | -0.471197 |
| 6  | -0.100900 | -4.582022 | -1.451387 |
| 1  | -1.854388 | -4.535991 | -0.203243 |
| 1  | -0.366672 | -4.214370 | 0.672537  |
| 6  | -1.018608 | -2.777186 | -2.961615 |
| 1  | -2.838154 | -2.574189 | -1.809945 |
| 1  | -1.890470 | -1.100271 | -1.910075 |
| 6  | -0.794115 | -4.285242 | -2.788411 |
| 1  | 0.037367  | -5.662079 | -1.318449 |
| 1  | 0.900948  | -4.133877 | -1.463283 |
| 1  | -1.540457 | -2.569666 | -3.903288 |
| 1  | -0.043069 | -2.274252 | -3.023132 |
| 1  | -0.200630 | -4.684231 | -3.620154 |
| 1  | -1.764462 | -4.801772 | -2.816400 |
| 6  | -3.181456 | -2.886516 | 1.724668  |
| 6  | -3.853075 | -2.308009 | 2.989175  |

|    |           |           |           |
|----|-----------|-----------|-----------|
| 6  | -4.254223 | -3.366076 | 0.731897  |
| 1  | -2.565664 | -3.747446 | 2.022925  |
| 6  | -4.819311 | -3.317222 | 3.630253  |
| 1  | -4.402038 | -1.398964 | 2.706554  |
| 1  | -3.103351 | -2.005831 | 3.727649  |
| 6  | -5.210674 | -4.382648 | 1.373051  |
| 1  | -4.827755 | -2.503083 | 0.390795  |
| 1  | -3.799243 | -3.798947 | -0.162796 |
| 6  | -5.874820 | -3.806537 | 2.630221  |
| 1  | -5.299581 | -2.863644 | 4.505909  |
| 1  | -4.243982 | -4.178580 | 3.998900  |
| 1  | -5.970197 | -4.682248 | 0.640842  |
| 1  | -4.653793 | -5.292290 | 1.640295  |
| 1  | -6.527777 | -4.552919 | 3.098346  |
| 1  | -6.517250 | -2.961558 | 2.343169  |
| 6  | -0.703273 | -1.526968 | 2.368249  |
| 6  | 0.760877  | -1.716589 | 1.924516  |
| 6  | -0.843074 | -0.204339 | 3.154848  |
| 1  | -0.949165 | -2.358222 | 3.044624  |
| 6  | 1.707594  | -1.684968 | 3.133199  |
| 1  | 1.036245  | -0.919401 | 1.229548  |
| 1  | 0.892045  | -2.663528 | 1.394821  |
| 6  | 0.118211  | -0.153384 | 4.352313  |
| 1  | -0.636136 | 0.624501  | 2.470987  |
| 1  | -1.878007 | -0.067888 | 3.492882  |
| 6  | 1.573974  | -0.371528 | 3.913732  |
| 1  | 2.737577  | -1.830258 | 2.787230  |
| 1  | 1.478936  | -2.530940 | 3.798247  |
| 1  | 0.014853  | 0.810227  | 4.866250  |
| 1  | -0.160035 | -0.929779 | 5.080644  |
| 1  | 2.239009  | -0.372808 | 4.786426  |
| 1  | 1.895434  | 0.459995  | 3.272353  |
| 7  | -1.510975 | 1.695999  | 0.571702  |
| 6  | -2.724517 | 2.455123  | 0.604972  |
| 6  | -2.718996 | 3.866260  | -0.037928 |
| 6  | -4.068444 | 4.616054  | -0.133522 |
| 6  | -1.743778 | 4.762499  | 0.779476  |
| 1  | -2.331411 | 3.754523  | -1.054993 |
| 6  | -4.653669 | 5.002478  | 1.233822  |
| 1  | -4.801642 | 4.067685  | -0.728020 |
| 1  | -3.868288 | 5.540280  | -0.692671 |
| 6  | -2.304522 | 5.194923  | 2.144446  |
| 1  | -0.790561 | 4.256717  | 0.924482  |
| 1  | -1.535947 | 5.656320  | 0.176876  |
| 6  | -3.670915 | 5.881242  | 2.019616  |
| 1  | -4.880094 | 4.099223  | 1.817964  |
| 1  | -5.607375 | 5.524809  | 1.092559  |
| 1  | -1.584533 | 5.862659  | 2.632265  |
| 1  | -2.397095 | 4.319696  | 2.801834  |
| 1  | -4.073148 | 6.120294  | 3.011469  |
| 1  | -3.548385 | 6.836846  | 1.489812  |
| 16 | -0.620622 | 1.555753  | -0.823541 |
| 8  | 0.297117  | 0.414922  | -0.564225 |
| 8  | -1.438900 | 1.503341  | -2.061724 |
| 6  | 0.441402  | 2.991140  | -0.953436 |
| 6  | 0.393216  | 3.790422  | -2.091812 |
| 6  | 1.375067  | 3.228015  | 0.057493  |



|    |           |           |           |
|----|-----------|-----------|-----------|
| 6  | 1.309331  | 4.836459  | -2.221493 |
| 1  | -0.335608 | 3.579276  | -2.866233 |
| 6  | 2.287249  | 4.264515  | -0.092915 |
| 1  | 1.409893  | 2.601644  | 0.940884  |
| 6  | 2.274839  | 5.079234  | -1.236634 |
| 1  | 1.285401  | 5.457612  | -3.112960 |
| 1  | 3.038898  | 4.416278  | 0.674493  |
| 6  | -4.337756 | 1.657100  | -0.106498 |
| 6  | -4.707607 | 0.210758  | -0.061285 |
| 1  | -5.385448 | -0.045176 | 0.756563  |
| 6  | -5.079398 | -0.447901 | -1.342052 |
| 6  | -4.380553 | -0.200394 | -2.540666 |
| 6  | -6.163824 | -1.343091 | -1.391789 |
| 6  | -4.735280 | -0.844708 | -3.723811 |
| 1  | -3.530652 | 0.475253  | -2.530702 |
| 6  | -6.513339 | -1.995982 | -2.574532 |
| 1  | -6.740496 | -1.528273 | -0.488490 |
| 6  | -5.798654 | -1.752505 | -3.748946 |
| 1  | -4.169914 | -0.643932 | -4.630234 |
| 1  | -7.351742 | -2.687900 | -2.578865 |
| 1  | -6.068599 | -2.257939 | -4.671914 |
| 1  | -4.295574 | 2.059320  | -1.114271 |
| 1  | -4.956715 | 2.254844  | 0.555635  |
| 1  | -3.004716 | 2.527652  | 1.657967  |
| 7  | 3.222979  | 0.316826  | -0.254052 |
| 1  | 2.254059  | 0.632301  | -0.153438 |
| 6  | 3.511056  | -0.216977 | -1.612997 |
| 6  | 2.880417  | -1.628840 | -1.713440 |
| 6  | 3.162318  | -2.314977 | -3.069710 |
| 6  | 3.351019  | -2.552632 | -0.566044 |
| 1  | 1.797727  | -1.489304 | -1.611125 |
| 6  | 4.623817  | -2.766564 | -3.223806 |
| 1  | 2.882925  | -1.661144 | -3.899465 |
| 1  | 2.514642  | -3.200140 | -3.136010 |
| 6  | 4.808768  | -3.016036 | -0.712686 |
| 1  | 3.209862  | -2.050904 | 0.393577  |
| 1  | 2.704005  | -3.439624 | -0.559465 |
| 6  | 5.051147  | -3.687036 | -2.071596 |
| 1  | 5.284120  | -1.888593 | -3.253206 |
| 1  | 4.751126  | -3.276155 | -4.186762 |
| 1  | 5.057213  | -3.704704 | 0.103996  |
| 1  | 5.486148  | -2.161463 | -0.601716 |
| 1  | 6.105608  | -3.970903 | -2.177678 |
| 1  | 4.466869  | -4.617507 | -2.123553 |
| 16 | 4.305242  | 1.355237  | 0.468097  |
| 8  | 4.897305  | 2.315946  | -0.480524 |
| 8  | 3.630978  | 1.847533  | 1.683333  |
| 6  | 5.615536  | 0.233787  | 0.947620  |
| 6  | 5.418859  | -0.605908 | 2.046723  |
| 6  | 6.796227  | 0.190770  | 0.209276  |
| 6  | 6.415423  | -1.511452 | 2.391601  |
| 1  | 4.503137  | -0.535640 | 2.622516  |
| 6  | 7.786737  | -0.725172 | 0.569121  |
| 1  | 6.932480  | 0.868088  | -0.626494 |
| 6  | 7.610003  | -1.591238 | 1.655025  |
| 1  | 6.269780  | -2.167788 | 3.245680  |
| 1  | 8.709061  | -0.765405 | -0.003822 |



|    |           |           |           |
|----|-----------|-----------|-----------|
| 1  | -4.358795 | -1.483997 | 2.650353  |
| 1  | -3.082223 | -2.167963 | 3.650224  |
| 6  | -5.247334 | -4.375693 | 1.182801  |
| 1  | -4.794464 | -2.470834 | 0.276283  |
| 1  | -3.801158 | -3.780973 | -0.314144 |
| 6  | -5.899321 | -3.836820 | 2.462773  |
| 1  | -5.305932 | -2.998069 | 4.381898  |
| 1  | -4.287828 | -4.320522 | 3.820972  |
| 1  | -6.012673 | -4.614319 | 0.434678  |
| 1  | -4.723203 | -5.315281 | 1.409839  |
| 1  | -6.577384 | -4.583440 | 2.893172  |
| 1  | -6.513631 | -2.960236 | 2.211863  |
| 6  | -0.666166 | -1.646283 | 2.310667  |
| 6  | 0.790760  | -1.845542 | 1.849420  |
| 6  | -0.783048 | -0.333046 | 3.117319  |
| 1  | -0.920869 | -2.485709 | 2.973575  |
| 6  | 1.745783  | -1.848876 | 3.051970  |
| 1  | 1.069084  | -1.036192 | 1.168476  |
| 1  | 0.906283  | -2.783563 | 1.300508  |
| 6  | 0.189860  | -0.311895 | 4.306451  |
| 1  | -0.571235 | 0.504376  | 2.444473  |
| 1  | -1.813373 | -0.190613 | 3.466777  |
| 6  | 1.638707  | -0.544905 | 3.852168  |
| 1  | 2.770391  | -2.007940 | 2.697375  |
| 1  | 1.505918  | -2.700669 | 3.705588  |
| 1  | 0.104388  | 0.646468  | 4.832822  |
| 1  | -0.093565 | -1.093870 | 5.026656  |
| 1  | 2.310326  | -0.569007 | 4.719474  |
| 1  | 1.965867  | 0.292032  | 3.220809  |
| 7  | -1.483580 | 1.706074  | 0.556433  |
| 6  | -2.749606 | 2.482522  | 0.578611  |
| 6  | -2.610234 | 3.949786  | 0.068686  |
| 6  | -3.927461 | 4.746119  | -0.058534 |
| 6  | -1.651272 | 4.734319  | 0.999141  |
| 1  | -2.169077 | 3.894282  | -0.931340 |
| 6  | -4.578552 | 5.059465  | 1.297610  |
| 1  | -4.635760 | 4.250479  | -0.728488 |
| 1  | -3.676023 | 5.697262  | -0.547464 |
| 6  | -2.279935 | 5.094934  | 2.355678  |
| 1  | -0.734717 | 4.167030  | 1.160301  |
| 1  | -1.362424 | 5.658024  | 0.480470  |
| 6  | -3.611247 | 5.842328  | 2.197139  |
| 1  | -4.867132 | 4.126484  | 1.802941  |
| 1  | -5.504406 | 5.626717  | 1.143903  |
| 1  | -1.570214 | 5.698570  | 2.933807  |
| 1  | -2.446031 | 4.180958  | 2.942462  |
| 1  | -4.064504 | 6.031780  | 3.177723  |
| 1  | -3.421477 | 6.825079  | 1.742266  |
| 16 | -0.615446 | 1.570766  | -0.828818 |
| 8  | 0.315482  | 0.429498  | -0.592529 |
| 8  | -1.442372 | 1.519026  | -2.065691 |
| 6  | 0.454189  | 3.002793  | -0.981790 |
| 6  | 0.422840  | 3.779616  | -2.136373 |
| 6  | 1.386097  | 3.251172  | 0.027957  |
| 6  | 1.351906  | 4.812382  | -2.283131 |
| 1  | -0.303827 | 3.560100  | -2.910587 |
| 6  | 2.313533  | 4.271533  | -0.139734 |

|    |           |           |           |
|----|-----------|-----------|-----------|
| 1  | 1.409477  | 2.641212  | 0.923419  |
| 6  | 2.316850  | 5.062730  | -1.299822 |
| 1  | 1.339441  | 5.415586  | -3.187227 |
| 1  | 3.063610  | 4.430200  | 0.628015  |
| 6  | -4.071820 | 1.795381  | -0.169785 |
| 6  | -4.581748 | 0.320797  | 0.036226  |
| 1  | -5.250386 | 0.247502  | 0.900545  |
| 6  | -5.180039 | -0.314524 | -1.164076 |
| 6  | -4.565640 | -0.245142 | -2.431235 |
| 6  | -6.384962 | -1.034479 | -1.058203 |
| 6  | -5.122660 | -0.890395 | -3.532689 |
| 1  | -3.633314 | 0.301023  | -2.540540 |
| 6  | -6.938670 | -1.687390 | -2.159597 |
| 1  | -6.888397 | -1.083889 | -0.095314 |
| 6  | -6.308291 | -1.621407 | -3.403761 |
| 1  | -4.624108 | -0.828054 | -4.496448 |
| 1  | -7.867459 | -2.240423 | -2.046520 |
| 1  | -6.738602 | -2.125278 | -4.264605 |
| 1  | -3.960321 | 2.014992  | -1.230500 |
| 1  | -4.864167 | 2.410581  | 0.253867  |
| 1  | -3.003739 | 2.521491  | 1.642538  |
| 7  | 3.224148  | 0.329163  | -0.262474 |
| 1  | 2.253003  | 0.645133  | -0.175252 |
| 6  | 3.541194  | -0.178781 | -1.624917 |
| 6  | 2.903174  | -1.583201 | -1.770017 |
| 6  | 3.200877  | -2.238160 | -3.138264 |
| 6  | 3.350543  | -2.537919 | -0.638778 |
| 1  | 1.820009  | -1.438318 | -1.680476 |
| 6  | 4.661847  | -2.694702 | -3.281943 |
| 1  | 2.937202  | -1.562322 | -3.955398 |
| 1  | 2.549573  | -3.117843 | -3.236128 |
| 6  | 4.806553  | -3.009869 | -0.775240 |
| 1  | 3.201753  | -2.057185 | 0.330098  |
| 1  | 2.695544  | -3.418814 | -0.661805 |
| 6  | 5.065934  | -3.646954 | -2.147272 |
| 1  | 5.327453  | -1.820335 | -3.279270 |
| 1  | 4.800883  | -3.180716 | -4.255402 |
| 1  | 5.036341  | -3.721944 | 0.026775  |
| 1  | 5.488275  | -2.163836 | -0.630371 |
| 1  | 6.120183  | -3.934867 | -2.244413 |
| 1  | 4.477060  | -4.572176 | -2.232100 |
| 16 | 4.297016  | 1.345446  | 0.502306  |
| 8  | 4.928606  | 2.308800  | -0.417582 |
| 8  | 3.595840  | 1.831610  | 1.704549  |
| 6  | 5.580342  | 0.202219  | 1.005103  |
| 6  | 5.341473  | -0.646436 | 2.088669  |
| 6  | 6.781191  | 0.151356  | 0.300784  |
| 6  | 6.315257  | -1.569395 | 2.452236  |
| 1  | 4.410293  | -0.569690 | 2.637980  |
| 6  | 7.748567  | -0.782022 | 0.678789  |
| 1  | 6.950494  | 0.835438  | -0.523391 |
| 6  | 7.529459  | -1.657324 | 1.749433  |
| 1  | 6.136021  | -2.232294 | 3.294842  |
| 1  | 8.686438  | -0.828799 | 0.132167  |
| 6  | 3.132152  | 0.862057  | -2.652237 |
| 6  | 2.001819  | 0.874940  | -3.357777 |
| 1  | 3.811776  | 1.709269  | -2.714302 |

|   |          |           |           |
|---|----------|-----------|-----------|
| 1 | 1.766069 | 1.707107  | -4.014374 |
| 1 | 1.257812 | 0.087561  | -3.294392 |
| 1 | 4.630413 | -0.286780 | -1.662718 |
| 6 | 3.367295 | 6.129743  | -1.479091 |
| 1 | 3.233672 | 6.679726  | -2.415167 |
| 1 | 3.347482 | 6.853445  | -0.655912 |
| 1 | 4.368015 | 5.682402  | -1.488363 |
| 6 | 8.559777 | -2.686691 | 2.141141  |
| 1 | 8.739498 | -2.678930 | 3.221615  |
| 1 | 8.221067 | -3.696307 | 1.878170  |
| 1 | 9.514890 | -2.515591 | 1.636973  |

-----  
**12**  
-----

Number of imaginary frequencies : 0  
The smallest frequencies are : 18.7461 22.0949 25.0725 cm(-1)

Electronic energy : HF=-3903.3381908  
Zero-point correction= 1.313187  
(Hartree/Particle)  
Thermal correction to Energy= 1.379551  
Thermal correction to Enthalpy= 1.380496  
Thermal correction to Gibbs Free Energy= 1.211882  
Sum of electronic and zero-point Energies= -3902.025004  
Sum of electronic and thermal Energies= -3901.958639  
Sum of electronic and thermal Enthalpies= -3901.957695  
Sum of electronic and thermal Free Energies= -3902.126309

.....  
Cartesian Coordinates  
.....

|    |           |           |           |
|----|-----------|-----------|-----------|
| 28 | -0.937166 | -0.065032 | -0.645827 |
| 15 | -3.039617 | 0.713862  | -0.197706 |
| 6  | -3.183455 | 2.188069  | -1.369170 |
| 6  | -4.508934 | 2.978195  | -1.344244 |
| 6  | -1.968868 | 3.140905  | -1.302260 |
| 1  | -3.116678 | 1.678947  | -2.342041 |
| 6  | -4.543334 | 4.041918  | -2.456636 |
| 1  | -4.629270 | 3.470316  | -0.371168 |
| 1  | -5.368450 | 2.312244  | -1.465254 |
| 6  | -2.024440 | 4.189458  | -2.422299 |
| 1  | -1.963256 | 3.654918  | -0.335317 |
| 1  | -1.030099 | 2.587704  | -1.369001 |
| 6  | -3.335150 | 4.984365  | -2.386073 |
| 1  | -5.480842 | 4.608072  | -2.393844 |
| 1  | -4.546920 | 3.534777  | -3.432098 |
| 1  | -1.160584 | 4.859512  | -2.336462 |
| 1  | -1.928330 | 3.682843  | -3.392691 |
| 1  | -3.371447 | 5.710789  | -3.207024 |
| 1  | -3.382577 | 5.562044  | -1.451168 |
| 6  | -3.350376 | 1.239150  | 1.591449  |
| 6  | -2.694084 | 0.219953  | 2.553482  |
| 6  | -2.958153 | 2.674991  | 1.989481  |
| 1  | -4.440341 | 1.165518  | 1.713154  |
| 6  | -3.069531 | 0.507566  | 4.015743  |
| 1  | -1.609963 | 0.287623  | 2.439489  |
| 1  | -2.972806 | -0.804343 | 2.287348  |

|   |           |           |           |
|---|-----------|-----------|-----------|
| 6 | -3.348437 | 2.956934  | 3.450793  |
| 1 | -1.881193 | 2.805339  | 1.874031  |
| 1 | -3.446882 | 3.403197  | 1.336735  |
| 6 | -2.709777 | 1.945855  | 4.412681  |
| 1 | -2.559542 | -0.208379 | 4.672426  |
| 1 | -4.149112 | 0.346743  | 4.153282  |
| 1 | -3.048973 | 3.977924  | 3.717821  |
| 1 | -4.443450 | 2.914311  | 3.547643  |
| 1 | -3.028122 | 2.147906  | 5.442864  |
| 1 | -1.620560 | 2.061506  | 4.378229  |
| 6 | -4.696371 | -0.151707 | -0.523946 |
| 6 | -4.952413 | -0.564739 | -1.987824 |
| 6 | -5.039778 | -1.319986 | 0.425120  |
| 1 | -5.409749 | 0.650859  | -0.288899 |
| 6 | -6.410899 | -1.010330 | -2.184759 |
| 1 | -4.298870 | -1.401332 | -2.247661 |
| 1 | -4.719646 | 0.251238  | -2.679271 |
| 6 | -6.492447 | -1.782985 | 0.218189  |
| 1 | -4.364710 | -2.157915 | 0.244795  |
| 1 | -4.911064 | -1.025776 | 1.469815  |
| 6 | -6.767495 | -2.166170 | -1.241025 |
| 1 | -6.567683 | -1.304468 | -3.229668 |
| 1 | -7.081772 | -0.160337 | -1.992543 |
| 1 | -6.700660 | -2.630771 | 0.881763  |
| 1 | -7.176448 | -0.974168 | 0.514706  |
| 1 | -7.817197 | -2.456820 | -1.369871 |
| 1 | -6.158899 | -3.042805 | -1.501131 |
| 7 | 0.905742  | -0.477826 | -1.262151 |
| 6 | 0.935501  | -1.800846 | -1.985569 |
| 6 | 1.330143  | -2.909534 | -0.981397 |
| 6 | 0.997061  | -4.343670 | -1.441610 |
| 6 | 2.834733  | -2.832261 | -0.645159 |
| 1 | 0.761649  | -2.717545 | -0.066678 |
| 6 | 1.870079  | -4.803631 | -2.618980 |
| 1 | -0.064764 | -4.438382 | -1.680932 |
| 1 | 1.175161  | -5.017123 | -0.591145 |
| 6 | 3.745416  | -3.315414 | -1.786248 |
| 1 | 3.099734  | -1.806242 | -0.379696 |
| 1 | 3.024780  | -3.458958 | 0.235758  |
| 6 | 3.361845  | -4.725039 | -2.259026 |
| 1 | 1.672327  | -4.172168 | -3.496072 |
| 1 | 1.602377  | -5.827717 | -2.907140 |
| 1 | 4.790294  | -3.294292 | -1.453164 |
| 1 | 3.686330  | -2.617309 | -2.628657 |
| 1 | 3.981658  | -5.022687 | -3.113937 |
| 1 | 3.569588  | -5.445230 | -1.453898 |
| 6 | -0.420051 | -1.936217 | -2.675640 |
| 6 | -1.567998 | -1.536625 | -1.727028 |
| 1 | -0.413713 | -1.228199 | -3.506959 |
| 1 | -2.386029 | -1.183040 | -2.362831 |
| 1 | 1.705181  | -1.775406 | -2.764878 |
| 1 | -0.575305 | -2.936388 | -3.102148 |
| 6 | -2.094204 | -2.696082 | -0.905212 |
| 6 | -1.841998 | -2.850101 | 0.465958  |
| 6 | -2.876576 | -3.685319 | -1.530088 |
| 6 | -2.341564 | -3.936432 | 1.187000  |
| 1 | -1.264175 | -2.090402 | 0.978807  |

|    |           |           |           |
|----|-----------|-----------|-----------|
| 6  | -3.387714 | -4.770926 | -0.816642 |
| 1  | -3.089652 | -3.595212 | -2.592872 |
| 6  | -3.122155 | -4.902099 | 0.549462  |
| 1  | -2.126702 | -4.018856 | 2.249329  |
| 1  | -3.995166 | -5.513935 | -1.326972 |
| 1  | -3.519809 | -5.745053 | 1.107502  |
| 7  | 1.765884  | 0.295404  | 1.569969  |
| 1  | 1.633651  | -0.235007 | 0.693709  |
| 6  | 2.437203  | -0.238396 | 2.785241  |
| 6  | 1.472611  | -1.112157 | 3.641294  |
| 6  | 0.852940  | -2.322153 | 2.915738  |
| 6  | 2.081672  | -1.513253 | 5.004758  |
| 1  | 0.653177  | -0.418025 | 3.853369  |
| 6  | 1.704534  | -3.600309 | 2.929501  |
| 1  | 0.602853  | -2.041220 | 1.889261  |
| 1  | -0.104266 | -2.546251 | 3.405904  |
| 6  | 2.928740  | -2.796184 | 4.979650  |
| 1  | 2.666709  | -0.677518 | 5.410318  |
| 1  | 1.248659  | -1.669362 | 5.703432  |
| 6  | 2.151341  | -3.961109 | 4.351864  |
| 1  | 2.595290  | -3.468744 | 2.306070  |
| 1  | 1.132250  | -4.420476 | 2.479530  |
| 1  | 3.237279  | -3.047855 | 6.001700  |
| 1  | 3.847792  | -2.625786 | 4.406777  |
| 1  | 2.765097  | -4.869796 | 4.340355  |
| 1  | 1.267291  | -4.184814 | 4.967045  |
| 16 | 0.819715  | 1.624540  | 1.657499  |
| 8  | -0.298613 | 1.453267  | 0.692954  |
| 8  | 0.456115  | 1.869885  | 3.062375  |
| 6  | 1.799925  | 3.022123  | 1.129222  |
| 6  | 3.178532  | 3.016841  | 1.327470  |
| 6  | 1.146794  | 4.133758  | 0.599114  |
| 6  | 3.913721  | 4.147494  | 0.975441  |
| 1  | 3.679090  | 2.141551  | 1.727524  |
| 6  | 1.897386  | 5.252748  | 0.254953  |
| 1  | 0.077841  | 4.107632  | 0.428124  |
| 6  | 3.289340  | 5.277531  | 0.431740  |
| 1  | 4.991108  | 4.146009  | 1.116837  |
| 1  | 1.397428  | 6.117518  | -0.173072 |
| 6  | 3.749006  | -0.843762 | 2.356692  |
| 6  | 4.936856  | -0.389093 | 2.759480  |
| 1  | 3.701426  | -1.680973 | 1.668183  |
| 1  | 5.862907  | -0.850749 | 2.428012  |
| 1  | 5.026850  | 0.446089  | 3.451152  |
| 1  | 2.669402  | 0.632002  | 3.407246  |
| 16 | 1.502818  | 0.726423  | -2.231970 |
| 8  | 1.004686  | 0.666109  | -3.627145 |
| 8  | 1.363288  | 2.012982  | -1.521346 |
| 6  | 3.275653  | 0.392262  | -2.332250 |
| 6  | 4.058076  | 0.503704  | -1.179484 |
| 6  | 3.855992  | 0.048600  | -3.550649 |
| 6  | 5.422514  | 0.247483  | -1.250747 |
| 1  | 3.603131  | 0.782085  | -0.237425 |
| 6  | 5.230035  | -0.199478 | -3.609902 |
| 1  | 3.232579  | -0.020130 | -4.435407 |
| 6  | 6.031687  | -0.108600 | -2.466130 |
| 1  | 6.024789  | 0.322713  | -0.348389 |

|   |          |           |           |
|---|----------|-----------|-----------|
| 1 | 5.682247 | -0.471357 | -4.560211 |
| 6 | 4.095534 | 6.479769  | 0.008757  |
| 1 | 5.044736 | 6.539538  | 0.549586  |
| 1 | 4.329364 | 6.431800  | -1.062122 |
| 1 | 3.546257 | 7.411174  | 0.178795  |
| 6 | 7.517102 | -0.366426 | -2.525343 |
| 1 | 7.814360 | -0.800967 | -3.483861 |
| 1 | 8.083455 | 0.563768  | -2.392657 |
| 1 | 7.834163 | -1.051163 | -1.730912 |

-----  
**TS[12-13]**  
 -----

Number of imaginary frequencies : 1  
 The smallest frequencies are : -1466.6435 16.1821 24.5859 cm(-1)

Electronic energy : HF=-3903.3252777  
 Zero-point correction= 1.309654  
 (Hartree/Particle)  
 Thermal correction to Energy= 1.375255  
 Thermal correction to Enthalpy= 1.376199  
 Thermal correction to Gibbs Free Energy= 1.209891  
 Sum of electronic and zero-point Energies= -3902.015624  
 Sum of electronic and thermal Energies= -3901.950023  
 Sum of electronic and thermal Enthalpies= -3901.949079  
 Sum of electronic and thermal Free Energies= -3902.115386

.....  
 Cartesian Coordinates  
 .....

|    |           |           |           |
|----|-----------|-----------|-----------|
| 28 | -0.982601 | -0.143483 | -0.553527 |
| 15 | -3.126723 | 0.519577  | -0.257904 |
| 6  | -3.323948 | 1.920576  | -1.504761 |
| 6  | -4.690714 | 2.636821  | -1.529679 |
| 6  | -2.164036 | 2.941515  | -1.483471 |
| 1  | -3.221929 | 1.365302  | -2.448781 |
| 6  | -4.776590 | 3.627415  | -2.704130 |
| 1  | -4.842640 | 3.179746  | -0.588543 |
| 1  | -5.511792 | 1.918562  | -1.612850 |
| 6  | -2.268711 | 3.916447  | -2.664582 |
| 1  | -2.189106 | 3.509242  | -0.548231 |
| 1  | -1.196597 | 2.437551  | -1.508219 |
| 6  | -3.622124 | 4.637640  | -2.686411 |
| 1  | -5.743890 | 4.144130  | -2.678593 |
| 1  | -4.746571 | 3.063168  | -3.647323 |
| 1  | -1.444986 | 4.638101  | -2.611058 |
| 1  | -2.135093 | 3.359522  | -3.602835 |
| 1  | -3.690386 | 5.308056  | -3.551740 |
| 1  | -3.709705 | 5.269337  | -1.790259 |
| 6  | -3.510841 | 1.101859  | 1.495887  |
| 6  | -2.829200 | 0.155464  | 2.512759  |
| 6  | -3.187053 | 2.568694  | 1.839444  |
| 1  | -4.599451 | 0.981469  | 1.592645  |
| 6  | -3.251198 | 0.485681  | 3.952374  |
| 1  | -1.747554 | 0.274507  | 2.422261  |
| 1  | -3.051224 | -0.890860 | 2.284587  |
| 6  | -3.617893 | 2.895521  | 3.279788  |



|   |           |           |           |
|---|-----------|-----------|-----------|
| 1 | -2.112909 | 2.729279  | 1.740817  |
| 1 | -3.687483 | 3.249334  | 1.145216  |
| 6 | -2.956394 | 1.952577  | 4.294203  |
| 1 | -2.726557 | -0.180599 | 4.648183  |
| 1 | -4.326512 | 0.286575  | 4.074820  |
| 1 | -3.364013 | 3.938228  | 3.507691  |
| 1 | -4.712100 | 2.813281  | 3.359653  |
| 1 | -3.299844 | 2.185214  | 5.309820  |
| 1 | -1.871874 | 2.108931  | 4.269305  |
| 6 | -4.700569 | -0.481177 | -0.588667 |
| 6 | -4.857963 | -0.990573 | -2.036071 |
| 6 | -4.984302 | -1.618472 | 0.417605  |
| 1 | -5.483968 | 0.272439  | -0.425143 |
| 6 | -6.253178 | -1.594658 | -2.263379 |
| 1 | -4.111842 | -1.765349 | -2.230549 |
| 1 | -4.681824 | -0.188290 | -2.759864 |
| 6 | -6.369841 | -2.240364 | 0.172538  |
| 1 | -4.220763 | -2.393184 | 0.330995  |
| 1 | -4.946144 | -1.246159 | 1.444119  |
| 6 | -6.529922 | -2.731395 | -1.271142 |
| 1 | -6.332800 | -1.955738 | -3.295876 |
| 1 | -7.015597 | -0.811039 | -2.144277 |
| 1 | -6.523093 | -3.066633 | 0.876975  |
| 1 | -7.147421 | -1.492986 | 0.388499  |
| 1 | -7.534352 | -3.143010 | -1.427791 |
| 1 | -5.817308 | -3.547893 | -1.451731 |
| 7 | 0.996846  | -0.443192 | -1.042282 |
| 6 | 1.137962  | -1.815869 | -1.687438 |
| 6 | 1.692097  | -2.831329 | -0.654844 |
| 6 | 1.286655  | -4.303709 | -0.886393 |
| 6 | 3.236567  | -2.741582 | -0.617649 |
| 1 | 1.298412  | -2.543426 | 0.323985  |
| 6 | 1.955629  | -4.939682 | -2.114570 |
| 1 | 0.201068  | -4.403001 | -0.940667 |
| 1 | 1.595989  | -4.867015 | 0.005121  |
| 6 | 3.920900  | -3.385774 | -1.835342 |
| 1 | 3.547106  | -1.697175 | -0.542785 |
| 1 | 3.597378  | -3.253118 | 0.284029  |
| 6 | 3.484448  | -4.843669 | -2.023840 |
| 1 | 1.618614  | -4.433191 | -3.029357 |
| 1 | 1.641652  | -5.986613 | -2.206113 |
| 1 | 5.008988  | -3.318686 | -1.716136 |
| 1 | 3.683277  | -2.815820 | -2.742552 |
| 1 | 3.953258  | -5.272465 | -2.918173 |
| 1 | 3.831783  | -5.440451 | -1.167802 |
| 6 | -0.196219 | -2.118457 | -2.372269 |
| 6 | -1.422264 | -1.753712 | -1.513101 |
| 1 | -0.230215 | -1.494731 | -3.266716 |
| 1 | -2.234306 | -1.565226 | -2.221931 |
| 1 | 1.887229  | -1.744316 | -2.482286 |
| 1 | -0.240401 | -3.161811 | -2.708385 |
| 6 | -1.867511 | -2.873258 | -0.597692 |
| 6 | -1.587925 | -2.896875 | 0.776610  |
| 6 | -2.585390 | -3.960116 | -1.130505 |
| 6 | -2.008243 | -3.950989 | 1.590392  |
| 1 | -1.050477 | -2.064801 | 1.217008  |
| 6 | -3.012755 | -5.016680 | -0.324511 |

|    |           |           |           |
|----|-----------|-----------|-----------|
| 1  | -2.813498 | -3.970084 | -2.193991 |
| 6  | -2.727086 | -5.015632 | 1.043787  |
| 1  | -1.777593 | -3.933755 | 2.652245  |
| 1  | -3.572365 | -5.838663 | -0.763492 |
| 1  | -3.061196 | -5.834620 | 1.674499  |
| 7  | 1.661880  | 0.400160  | 1.355368  |
| 1  | 1.486665  | -0.139945 | 0.167848  |
| 6  | 2.560851  | 0.113992  | 2.520135  |
| 6  | 1.861760  | -0.760308 | 3.614437  |
| 6  | 1.196379  | -2.054767 | 3.115181  |
| 6  | 2.765768  | -1.020899 | 4.842196  |
| 1  | 1.050437  | -0.110125 | 3.949902  |
| 6  | 2.123083  | -3.274037 | 3.020677  |
| 1  | 0.720513  | -1.853818 | 2.152989  |
| 1  | 0.382955  | -2.299790 | 3.812722  |
| 6  | 3.671877  | -2.258870 | 4.729917  |
| 1  | 3.369530  | -0.129302 | 5.055925  |
| 1  | 2.108886  | -1.159195 | 5.711782  |
| 6  | 2.869674  | -3.508292 | 4.340319  |
| 1  | 2.858241  | -3.126799 | 2.222482  |
| 1  | 1.537314  | -4.158383 | 2.741065  |
| 1  | 4.189182  | -2.418519 | 5.684283  |
| 1  | 4.450342  | -2.085190 | 3.978080  |
| 1  | 3.533048  | -4.377928 | 4.257029  |
| 1  | 2.143520  | -3.739483 | 5.133491  |
| 16 | 0.646822  | 1.625961  | 1.573198  |
| 8  | -0.482905 | 1.454607  | 0.595205  |
| 8  | 0.218571  | 1.803699  | 2.977173  |
| 6  | 1.428645  | 3.181815  | 1.123591  |
| 6  | 2.814542  | 3.296605  | 1.090888  |
| 6  | 0.612809  | 4.283545  | 0.861554  |
| 6  | 3.389361  | 4.529698  | 0.782092  |
| 1  | 3.443155  | 2.436263  | 1.287179  |
| 6  | 1.200741  | 5.504392  | 0.548337  |
| 1  | -0.465938 | 4.180675  | 0.882396  |
| 6  | 2.596552  | 5.648118  | 0.499588  |
| 1  | 4.472100  | 4.617691  | 0.748929  |
| 1  | 0.567551  | 6.360776  | 0.330278  |
| 6  | 3.876634  | -0.394188 | 2.001343  |
| 6  | 5.046149  | 0.212841  | 2.214550  |
| 1  | 3.851501  | -1.310628 | 1.424812  |
| 1  | 5.976854  | -0.198822 | 1.833337  |
| 1  | 5.119452  | 1.130527  | 2.794902  |
| 1  | 2.776054  | 1.062217  | 3.029529  |
| 16 | 1.472525  | 0.763806  | -2.155872 |
| 8  | 0.820072  | 0.554404  | -3.462276 |
| 8  | 1.331721  | 2.069724  | -1.499397 |
| 6  | 3.232215  | 0.483732  | -2.402845 |
| 6  | 4.108645  | 0.743870  | -1.347254 |
| 6  | 3.704622  | 0.042384  | -3.636618 |
| 6  | 5.471435  | 0.543635  | -1.532875 |
| 1  | 3.724633  | 1.079363  | -0.392907 |
| 6  | 5.077775  | -0.146067 | -3.809295 |
| 1  | 3.005047  | -0.143166 | -4.444234 |
| 6  | 5.978663  | 0.096672  | -2.764972 |
| 1  | 6.152342  | 0.733016  | -0.707027 |
| 1  | 5.450986  | -0.491172 | -4.769689 |



|   |           |           |           |
|---|-----------|-----------|-----------|
| 1 | -2.937798 | -0.910363 | 2.405999  |
| 6 | -3.376103 | 2.877776  | 3.461151  |
| 1 | -1.943990 | 2.682378  | 1.855546  |
| 1 | -3.532121 | 3.256401  | 1.337341  |
| 6 | -2.696641 | 1.908987  | 4.438520  |
| 1 | -2.491028 | -0.231626 | 4.756393  |
| 1 | -4.107051 | 0.270806  | 4.262452  |
| 1 | -3.085178 | 3.911152  | 3.686694  |
| 1 | -4.468044 | 2.823320  | 3.586586  |
| 1 | -2.997514 | 2.136237  | 5.468919  |
| 1 | -1.611844 | 2.043000  | 4.372151  |
| 6 | -4.755796 | -0.431620 | -0.355124 |
| 6 | -5.032241 | -0.912149 | -1.794528 |
| 6 | -4.999394 | -1.579717 | 0.649216  |
| 1 | -5.507410 | 0.336935  | -0.124466 |
| 6 | -6.462720 | -1.459366 | -1.928210 |
| 1 | -4.334781 | -1.714256 | -2.049086 |
| 1 | -4.875008 | -0.106953 | -2.519375 |
| 6 | -6.420083 | -2.150522 | 0.498183  |
| 1 | -4.269878 | -2.375568 | 0.490297  |
| 1 | -4.872422 | -1.231707 | 1.677104  |
| 6 | -6.707248 | -2.605050 | -0.937712 |
| 1 | -6.632588 | -1.796757 | -2.957893 |
| 1 | -7.183480 | -0.650638 | -1.738642 |
| 1 | -6.548831 | -2.985470 | 1.197193  |
| 1 | -7.151875 | -1.381766 | 0.786699  |
| 1 | -7.735780 | -2.975640 | -1.024526 |
| 1 | -6.042678 | -3.443518 | -1.187338 |
| 7 | 0.844431  | -0.468999 | -1.303619 |
| 6 | 0.923809  | -1.842510 | -1.948383 |
| 6 | 1.404873  | -2.865147 | -0.896025 |
| 6 | 1.126849  | -4.332861 | -1.280791 |
| 6 | 2.913278  | -2.705063 | -0.607551 |
| 1 | 0.851367  | -2.657360 | 0.023367  |
| 6 | 1.987948  | -4.808212 | -2.460343 |
| 1 | 0.064491  | -4.490363 | -1.480195 |
| 1 | 1.361522  | -4.947978 | -0.401348 |
| 6 | 3.810725  | -3.192550 | -1.756263 |
| 1 | 3.148457  | -1.664951 | -0.372346 |
| 1 | 3.145066  | -3.286277 | 0.291651  |
| 6 | 3.484149  | -4.639148 | -2.154212 |
| 1 | 1.731376  | -4.234889 | -3.362293 |
| 1 | 1.762550  | -5.857136 | -2.687262 |
| 1 | 4.862259  | -3.105508 | -1.457504 |
| 1 | 3.692726  | -2.537436 | -2.627704 |
| 1 | 4.090653  | -4.944601 | -3.015610 |
| 1 | 3.753643  | -5.309667 | -1.325446 |
| 6 | -0.457737 | -2.062497 | -2.561360 |
| 6 | -1.600790 | -1.712346 | -1.583497 |
| 1 | -0.535282 | -1.390370 | -3.417750 |
| 1 | -2.463871 | -1.482576 | -2.214807 |
| 1 | 1.664601  | -1.804615 | -2.753080 |
| 1 | -0.550426 | -3.084491 | -2.949146 |
| 6 | -1.997077 | -2.860543 | -0.676016 |
| 6 | -1.647863 | -2.929219 | 0.682808  |
| 6 | -2.761975 | -3.918652 | -1.200468 |
| 6 | -2.048210 | -4.000190 | 1.484968  |

|    |           |           |           |
|----|-----------|-----------|-----------|
| 1  | -1.071650 | -2.122822 | 1.126568  |
| 6  | -3.169283 | -4.991023 | -0.404829 |
| 1  | -3.047078 | -3.891654 | -2.249881 |
| 6  | -2.815439 | -5.034603 | 0.946304  |
| 1  | -1.766463 | -4.018233 | 2.534314  |
| 1  | -3.766868 | -5.788884 | -0.838102 |
| 1  | -3.134246 | -5.864512 | 1.570570  |
| 7  | 1.807465  | 0.328018  | 1.362504  |
| 1  | 1.409718  | -0.365416 | -0.427316 |
| 6  | 2.671984  | 0.088166  | 2.557512  |
| 6  | 1.994380  | -0.916591 | 3.544491  |
| 6  | 1.715881  | -2.319349 | 2.967128  |
| 6  | 2.696606  | -1.002246 | 4.920064  |
| 1  | 1.023206  | -0.443580 | 3.718471  |
| 6  | 2.886524  | -3.310634 | 3.075618  |
| 1  | 1.387142  | -2.217050 | 1.929079  |
| 1  | 0.865858  | -2.746725 | 3.517969  |
| 6  | 3.861163  | -2.002990 | 4.993242  |
| 1  | 3.033218  | -0.003261 | 5.226050  |
| 1  | 1.942709  | -1.307618 | 5.659135  |
| 6  | 3.424217  | -3.392650 | 4.510213  |
| 1  | 3.708143  | -3.004345 | 2.418119  |
| 1  | 2.562112  | -4.299368 | 2.726165  |
| 1  | 4.235520  | -2.055480 | 6.023379  |
| 1  | 4.693176  | -1.652785 | 4.371667  |
| 1  | 4.260755  | -4.100373 | 4.565413  |
| 1  | 2.638042  | -3.781083 | 5.174491  |
| 16 | 0.780614  | 1.512768  | 1.551297  |
| 8  | -0.368775 | 1.338309  | 0.574297  |
| 8  | 0.318818  | 1.757972  | 2.942533  |
| 6  | 1.516255  | 3.082712  | 1.038732  |
| 6  | 2.901368  | 3.228444  | 1.013718  |
| 6  | 0.686466  | 4.155265  | 0.712357  |
| 6  | 3.455057  | 4.456238  | 0.650635  |
| 1  | 3.546245  | 2.391770  | 1.258888  |
| 6  | 1.251795  | 5.373018  | 0.345056  |
| 1  | -0.388834 | 4.026900  | 0.718868  |
| 6  | 2.643606  | 5.545463  | 0.308972  |
| 1  | 4.536556  | 4.565588  | 0.623320  |
| 1  | 0.602802  | 6.202200  | 0.074035  |
| 6  | 4.042113  | -0.285057 | 2.053610  |
| 6  | 5.165091  | 0.371378  | 2.356892  |
| 1  | 4.089750  | -1.135243 | 1.379737  |
| 1  | 6.132497  | 0.060753  | 1.969820  |
| 1  | 5.160916  | 1.229262  | 3.026236  |
| 1  | 2.789692  | 1.012025  | 3.141271  |
| 16 | 1.379947  | 0.795123  | -2.400481 |
| 8  | 0.747640  | 0.536722  | -3.699400 |
| 8  | 1.186206  | 2.077523  | -1.728805 |
| 6  | 3.135261  | 0.482340  | -2.547595 |
| 6  | 3.942532  | 0.654251  | -1.419737 |
| 6  | 3.668002  | 0.098239  | -3.776460 |
| 6  | 5.307568  | 0.421000  | -1.534406 |
| 1  | 3.504607  | 0.935045  | -0.468260 |
| 6  | 5.043496  | -0.119419 | -3.872085 |
| 1  | 3.017171  | -0.023982 | -4.635305 |
| 6  | 5.880051  | 0.036217  | -2.759095 |

|   |          |           |           |
|---|----------|-----------|-----------|
| 1 | 5.935668 | 0.537756  | -0.655542 |
| 1 | 5.469498 | -0.418629 | -4.825642 |
| 6 | 3.251267 | 6.876847  | -0.059367 |
| 1 | 3.433037 | 7.486497  | 0.835128  |
| 1 | 4.212581 | 6.752686  | -0.568078 |
| 1 | 2.592175 | 7.452525  | -0.716559 |
| 6 | 7.366892 | -0.194030 | -2.859597 |
| 1 | 7.648729 | -0.609443 | -3.830790 |
| 1 | 7.917328 | 0.744843  | -2.724586 |
| 1 | 7.713127 | -0.883350 | -2.081628 |

-----  
**14**  
-----

Number of imaginary frequencies : 0  
The smallest frequencies are : 15.5547 20.1590 21.5084 cm(-1)

Electronic energy : HF=-3903.3210725  
Zero-point correction= 1.313060  
(Hartree/Particle)  
Thermal correction to Energy= 1.379647  
Thermal correction to Enthalpy= 1.380591  
Thermal correction to Gibbs Free Energy= 1.210956  
Sum of electronic and zero-point Energies= -3902.008012  
Sum of electronic and thermal Energies= -3901.941426  
Sum of electronic and thermal Enthalpies= -3901.940482  
Sum of electronic and thermal Free Energies= -3902.110117

.....  
Cartesian Coordinates  
.....

|    |          |           |           |
|----|----------|-----------|-----------|
| 28 | 0.798040 | -0.051186 | 0.348474  |
| 15 | 2.298784 | 0.511905  | -1.191047 |
| 6  | 3.925678 | -0.292226 | -0.747122 |
| 6  | 5.113283 | -0.066869 | -1.700009 |
| 6  | 4.326734 | 0.036299  | 0.706333  |
| 1  | 3.680564 | -1.359052 | -0.771769 |
| 6  | 6.314004 | -0.926443 | -1.269797 |
| 1  | 5.412069 | 0.988230  | -1.674804 |
| 1  | 4.834820 | -0.297925 | -2.733971 |
| 6  | 5.548114 | -0.788967 | 1.140556  |
| 1  | 4.563134 | 1.105646  | 0.793763  |
| 1  | 3.483469 | -0.158096 | 1.378685  |
| 6  | 6.728310 | -0.611833 | 0.174679  |
| 1  | 7.154330 | -0.761647 | -1.954947 |
| 1  | 6.042960 | -1.988528 | -1.347811 |
| 1  | 5.841377 | -0.508155 | 2.159624  |
| 1  | 5.261938 | -1.846678 | 1.174108  |
| 1  | 7.565993 | -1.250973 | 0.478527  |
| 1  | 7.089593 | 0.425791  | 0.225352  |
| 6  | 2.713111 | 2.347891  | -1.374130 |
| 6  | 3.386552 | 2.767379  | -2.701561 |
| 6  | 1.521298 | 3.283177  | -1.096718 |
| 1  | 3.446937 | 2.505312  | -0.571056 |
| 6  | 3.871913 | 4.224949  | -2.617326 |
| 1  | 2.657161 | 2.687979  | -3.516852 |
| 1  | 4.224486 | 2.117603  | -2.961865 |
| 6  | 1.978960 | 4.746921  | -1.020626 |

|    |           |           |           |
|----|-----------|-----------|-----------|
| 1  | 0.773129  | 3.175423  | -1.890193 |
| 1  | 1.031152  | 2.984743  | -0.173881 |
| 6  | 2.717625  | 5.182197  | -2.292774 |
| 1  | 4.351547  | 4.507903  | -3.562206 |
| 1  | 4.642915  | 4.302646  | -1.837095 |
| 1  | 1.110983  | 5.392048  | -0.846481 |
| 1  | 2.641517  | 4.868366  | -0.150592 |
| 1  | 3.089218  | 6.209299  | -2.191994 |
| 1  | 2.009660  | 5.183860  | -3.133590 |
| 6  | 1.940979  | -0.019807 | -2.954735 |
| 6  | 2.041038  | -1.530067 | -3.232765 |
| 6  | 0.581853  | 0.523918  | -3.440103 |
| 1  | 2.733875  | 0.458483  | -3.542494 |
| 6  | 1.850870  | -1.813495 | -4.732109 |
| 1  | 1.254362  | -2.055928 | -2.685848 |
| 1  | 3.001868  | -1.929762 | -2.891784 |
| 6  | 0.361809  | 0.223447  | -4.930613 |
| 1  | -0.221718 | 0.061170  | -2.864771 |
| 1  | 0.505096  | 1.599814  | -3.261951 |
| 6  | 0.503022  | -1.274423 | -5.230104 |
| 1  | 1.923494  | -2.893023 | -4.912383 |
| 1  | 2.669050  | -1.342950 | -5.297163 |
| 1  | -0.634210 | 0.572592  | -5.222849 |
| 1  | 1.092758  | 0.787067  | -5.529935 |
| 1  | 0.393544  | -1.460806 | -6.305394 |
| 1  | -0.313866 | -1.808261 | -4.728977 |
| 7  | -0.074427 | 1.575255  | 1.253722  |
| 6  | -0.070143 | 1.955042  | 2.694258  |
| 6  | -0.441996 | 0.759125  | 3.637037  |
| 6  | 0.701800  | -0.256386 | 3.825728  |
| 6  | -1.059725 | 1.176996  | 4.992502  |
| 1  | -1.247213 | 0.263357  | 3.087503  |
| 6  | 1.678185  | 0.047782  | 4.974538  |
| 1  | 1.266450  | -0.330320 | 2.888719  |
| 1  | 0.256450  | -1.244803 | 4.003927  |
| 6  | -0.053217 | 1.486521  | 6.111976  |
| 1  | -1.741916 | 2.022814  | 4.840672  |
| 1  | -1.686384 | 0.341591  | 5.334814  |
| 6  | 0.941331  | 0.331667  | 6.289604  |
| 1  | 2.295213  | 0.914111  | 4.713582  |
| 1  | 2.365775  | -0.799146 | 5.095359  |
| 1  | -0.595677 | 1.671769  | 7.047129  |
| 1  | 0.500031  | 2.408055  | 5.891093  |
| 1  | 1.658718  | 0.560835  | 7.086732  |
| 1  | 0.395051  | -0.568993 | 6.606185  |
| 16 | -1.505880 | 1.763011  | 0.536613  |
| 8  | -1.355312 | 1.284478  | -0.871372 |
| 8  | -2.648626 | 1.158901  | 1.274873  |
| 6  | 1.219432  | 2.646448  | 3.061597  |
| 6  | 2.332440  | 2.680606  | 2.328735  |
| 1  | 1.205889  | 3.142319  | 4.029989  |
| 1  | 3.226895  | 3.190229  | 2.676183  |
| 1  | 2.379633  | 2.181518  | 1.371408  |
| 1  | -0.866166 | 2.695178  | 2.860714  |
| 7  | -1.662197 | -1.619502 | -1.167741 |
| 1  | -1.455282 | -0.612486 | -1.172264 |
| 6  | -1.774612 | -2.113879 | 0.230663  |

|    |           |           |           |
|----|-----------|-----------|-----------|
| 6  | -2.311523 | -3.563693 | 0.330561  |
| 6  | -1.422869 | -4.669626 | -0.288020 |
| 6  | -2.788059 | -3.923943 | 1.764305  |
| 1  | -3.226660 | -3.542615 | -0.265539 |
| 6  | -0.415979 | -5.316245 | 0.675717  |
| 1  | -0.918643 | -4.273910 | -1.173899 |
| 1  | -2.093722 | -5.455767 | -0.657397 |
| 6  | -1.745136 | -4.587542 | 2.679403  |
| 1  | -3.214330 | -3.035355 | 2.247512  |
| 1  | -3.618173 | -4.634593 | 1.656516  |
| 6  | -1.080563 | -5.777433 | 1.977938  |
| 1  | 0.382504  | -4.614025 | 0.924913  |
| 1  | 0.070713  | -6.160876 | 0.172470  |
| 1  | -2.234328 | -4.906603 | 3.608000  |
| 1  | -0.968047 | -3.871058 | 2.976594  |
| 1  | -0.341635 | -6.247780 | 2.637836  |
| 1  | -1.842374 | -6.539640 | 1.758133  |
| 16 | -2.817169 | -1.872007 | -2.352573 |
| 8  | -2.496909 | -0.878055 | -3.387847 |
| 8  | -2.856888 | -3.297356 | -2.704550 |
| 6  | -4.397420 | -1.455347 | -1.610654 |
| 6  | -5.451682 | -2.366620 | -1.664939 |
| 6  | -4.535165 | -0.226242 | -0.961102 |
| 6  | -6.665763 | -2.032353 | -1.065359 |
| 1  | -5.311348 | -3.321256 | -2.160143 |
| 6  | -5.749484 | 0.083249  | -0.356466 |
| 1  | -3.701265 | 0.462519  | -0.902472 |
| 6  | -6.833607 | -0.807473 | -0.404526 |
| 1  | -7.491768 | -2.737636 | -1.104558 |
| 1  | -5.851342 | 1.025737  | 0.174803  |
| 6  | -0.397831 | -1.848273 | 0.906463  |
| 6  | 0.846813  | -1.977172 | 0.064156  |
| 1  | -0.328638 | -2.389881 | 1.848679  |
| 1  | 0.599811  | -2.218380 | -0.964235 |
| 1  | -2.505578 | -1.483310 | 0.754575  |
| 1  | -0.485146 | -0.779508 | 1.299328  |
| 6  | -1.894770 | 3.523418  | 0.432255  |
| 6  | -3.144887 | 3.866718  | -0.095224 |
| 6  | -1.003819 | 4.515315  | 0.836094  |
| 6  | -3.488497 | 5.207018  | -0.228095 |
| 1  | -3.837302 | 3.090639  | -0.404016 |
| 6  | -1.370350 | 5.858004  | 0.710191  |
| 1  | -0.033489 | 4.252814  | 1.239995  |
| 6  | -2.608907 | 6.226107  | 0.174481  |
| 1  | -4.455556 | 5.471312  | -0.648641 |
| 1  | -0.673918 | 6.628450  | 1.030712  |
| 6  | 1.987381  | -2.797265 | 0.554286  |
| 6  | 2.677366  | -3.630785 | -0.348815 |
| 6  | 2.399713  | -2.824214 | 1.899473  |
| 6  | 3.729347  | -4.444878 | 0.068905  |
| 1  | 2.361908  | -3.658199 | -1.386275 |
| 6  | 3.446785  | -3.642107 | 2.321934  |
| 1  | 1.886584  | -2.208887 | 2.626206  |
| 6  | 4.122852  | -4.455564 | 1.409117  |
| 1  | 4.233197  | -5.082245 | -0.652726 |
| 1  | 3.736211  | -3.641266 | 3.369378  |
| 1  | 4.938562  | -5.092413 | 1.738427  |





|    |           |           |           |
|----|-----------|-----------|-----------|
| 6  | 4.384003  | 5.890828  | 0.005071  |
| 1  | 4.711439  | 6.289241  | -2.109713 |
| 1  | 5.724324  | 5.012294  | -1.445119 |
| 1  | 4.048478  | 5.023966  | 1.976308  |
| 1  | 5.318749  | 4.236986  | 1.044318  |
| 1  | 5.125438  | 6.622764  | 0.346951  |
| 1  | 3.410965  | 6.402529  | 0.007289  |
| 6  | 0.965844  | 2.455747  | -2.152083 |
| 6  | 0.056157  | 1.285196  | -2.589882 |
| 6  | 0.217673  | 3.393975  | -1.189375 |
| 1  | 1.246707  | 3.041578  | -3.035787 |
| 6  | -1.249712 | 1.787711  | -3.218304 |
| 1  | -0.197948 | 0.706176  | -1.698748 |
| 1  | 0.574762  | 0.611611  | -3.281536 |
| 6  | -1.108800 | 3.877314  | -1.799366 |
| 1  | 0.008783  | 2.861268  | -0.263390 |
| 1  | 0.835775  | 4.259715  | -0.934865 |
| 6  | -1.990438 | 2.703013  | -2.238640 |
| 1  | -1.887426 | 0.939033  | -3.481571 |
| 1  | -1.028662 | 2.333870  | -4.148243 |
| 1  | -1.634624 | 4.498749  | -1.063635 |
| 1  | -0.897137 | 4.522480  | -2.665354 |
| 1  | -2.926916 | 3.060233  | -2.678663 |
| 1  | -2.253633 | 2.110102  | -1.356801 |
| 7  | 1.205772  | 0.870228  | 1.779992  |
| 6  | 1.781021  | 0.631514  | 3.148234  |
| 6  | 1.699451  | -0.877721 | 3.584566  |
| 6  | 2.989437  | -1.708776 | 3.414838  |
| 6  | 1.147945  | -1.042558 | 5.014256  |
| 1  | 0.958593  | -1.305324 | 2.909713  |
| 6  | 4.029231  | -1.533201 | 4.535544  |
| 1  | 3.446867  | -1.498733 | 2.445673  |
| 1  | 2.690886  | -2.767307 | 3.386113  |
| 6  | 2.197258  | -0.770044 | 6.100392  |
| 1  | 0.266329  | -0.404652 | 5.136652  |
| 1  | 0.797540  | -2.079034 | 5.126520  |
| 6  | 3.404922  | -1.703525 | 5.927823  |
| 1  | 4.477294  | -0.536226 | 4.472829  |
| 1  | 4.846010  | -2.250311 | 4.387398  |
| 1  | 1.752575  | -0.897835 | 7.095119  |
| 1  | 2.535191  | 0.273113  | 6.036772  |
| 1  | 4.155385  | -1.515263 | 6.705654  |
| 1  | 3.072054  | -2.744590 | 6.056702  |
| 16 | -0.417381 | 0.976991  | 1.818831  |
| 8  | -0.946319 | 0.703611  | 0.458505  |
| 8  | -1.040977 | 0.213437  | 2.931207  |
| 6  | 3.156379  | 1.240513  | 3.165811  |
| 6  | 3.529514  | 2.256791  | 3.945570  |
| 1  | 3.873689  | 0.805948  | 2.472950  |
| 1  | 4.538967  | 2.658385  | 3.912102  |
| 1  | 2.843107  | 2.718919  | 4.651907  |
| 1  | 1.174867  | 1.199654  | 3.863834  |
| 7  | 0.341112  | -2.079735 | -1.589828 |
| 1  | 0.342432  | -1.167376 | -1.134975 |
| 6  | 1.612310  | -2.831225 | -1.487684 |
| 6  | 2.295573  | -2.910486 | -2.886758 |
| 6  | 3.632045  | -3.691591 | -2.879799 |

|    |           |           |           |
|----|-----------|-----------|-----------|
| 6  | 1.368010  | -3.504847 | -3.969968 |
| 1  | 2.502265  | -1.874406 | -3.179219 |
| 6  | 3.446466  | -5.210893 | -2.743458 |
| 1  | 4.308230  | -3.325927 | -2.101989 |
| 1  | 4.134049  | -3.489803 | -3.836263 |
| 6  | 1.197526  | -5.028902 | -3.870186 |
| 1  | 0.392555  | -3.015194 | -3.936314 |
| 1  | 1.813832  | -3.262267 | -4.944772 |
| 6  | 2.546614  | -5.757894 | -3.859353 |
| 1  | 3.000505  | -5.448231 | -1.766701 |
| 1  | 4.427089  | -5.701989 | -2.760001 |
| 1  | 0.577516  | -5.376699 | -4.704683 |
| 1  | 0.639699  | -5.273596 | -2.960677 |
| 1  | 2.399222  | -6.838040 | -3.739132 |
| 1  | 3.052017  | -5.614560 | -4.825652 |
| 16 | -1.114065 | -2.844803 | -1.259365 |
| 8  | -2.103564 | -1.760922 | -1.315395 |
| 8  | -1.215366 | -4.013310 | -2.138540 |
| 6  | -1.010453 | -3.454117 | 0.416511  |
| 6  | -1.219595 | -2.559189 | 1.463812  |
| 6  | -0.683588 | -4.791533 | 0.656381  |
| 6  | -1.090458 | -3.009163 | 2.774559  |
| 1  | -1.479842 | -1.530955 | 1.262061  |
| 6  | -0.552964 | -5.222931 | 1.976025  |
| 1  | -0.559900 | -5.477887 | -0.174206 |
| 6  | -0.744772 | -4.340026 | 3.051003  |
| 1  | -1.250605 | -2.299651 | 3.579402  |
| 1  | -0.305535 | -6.262533 | 2.174429  |
| 6  | 2.538662  | -2.265936 | -0.391755 |
| 6  | 3.598736  | -1.395764 | -0.650487 |
| 1  | 2.591547  | -2.859245 | 0.516644  |
| 1  | 3.746872  | -1.057671 | -1.664936 |
| 1  | 1.366262  | -3.849488 | -1.169393 |
| 1  | 1.549823  | -1.236516 | 0.724344  |
| 6  | -0.813035 | 2.698618  | 2.196292  |
| 6  | 0.187829  | 3.641538  | 2.408815  |
| 6  | -2.162739 | 3.059247  | 2.278822  |
| 6  | -0.163247 | 4.966583  | 2.679156  |
| 1  | 1.226180  | 3.339087  | 2.353133  |
| 6  | -2.495586 | 4.381532  | 2.554683  |
| 1  | -2.939298 | 2.314790  | 2.131911  |
| 6  | -1.504138 | 5.359352  | 2.748058  |
| 1  | 0.621050  | 5.702793  | 2.836495  |
| 1  | -3.542918 | 4.664114  | 2.628579  |
| 6  | -0.555710 | -4.803897 | 4.473876  |
| 1  | 0.485084  | -4.663690 | 4.792458  |
| 1  | -1.185545 | -4.237585 | 5.166020  |
| 1  | -0.790734 | -5.866688 | 4.587781  |
| 6  | -1.894177 | 6.788968  | 3.031558  |
| 1  | -1.017871 | 7.436176  | 3.127454  |
| 1  | -2.523843 | 7.192654  | 2.230149  |
| 1  | -2.470583 | 6.865193  | 3.961222  |
| 6  | 4.784841  | -1.322806 | 0.247974  |
| 6  | 5.338863  | -2.502225 | 0.776736  |
| 6  | 5.390328  | -0.098812 | 0.579939  |
| 6  | 6.451252  | -2.456369 | 1.616579  |
| 1  | 4.896771  | -3.460354 | 0.519593  |

|    |           |           |           |
|----|-----------|-----------|-----------|
| 6  | 6.501047  | -0.051332 | 1.422018  |
| 1  | 4.954563  | 0.821211  | 0.209473  |
| 6  | 7.035333  | -1.230485 | 1.944835  |
| 1  | 6.863544  | -3.379600 | 2.013272  |
| 1  | 6.939731  | 0.908843  | 1.678189  |
| 1  | 7.897588  | -1.195197 | 2.603924  |
| 7  | -4.804034 | -0.578385 | -0.968981 |
| 1  | -3.915044 | -1.031482 | -1.178436 |
| 6  | -5.687638 | -1.148576 | 0.056242  |
| 6  | -6.116006 | -2.608097 | -0.304936 |
| 6  | -4.955320 | -3.623019 | -0.388281 |
| 6  | -7.269692 | -3.162576 | 0.565667  |
| 1  | -6.516831 | -2.489385 | -1.317625 |
| 6  | -4.528172 | -4.204111 | 0.967838  |
| 1  | -4.099356 | -3.176344 | -0.899864 |
| 1  | -5.287747 | -4.451354 | -1.029147 |
| 6  | -6.849934 | -3.822291 | 1.893045  |
| 1  | -8.012320 | -2.375200 | 0.751465  |
| 1  | -7.783798 | -3.926304 | -0.033658 |
| 6  | -5.721310 | -4.843518 | 1.690604  |
| 1  | -4.100945 | -3.412285 | 1.592510  |
| 1  | -3.732307 | -4.942595 | 0.815913  |
| 1  | -7.725573 | -4.305051 | 2.345337  |
| 1  | -6.515173 | -3.066553 | 2.612556  |
| 1  | -5.410040 | -5.258941 | 2.657307  |
| 1  | -6.097413 | -5.686081 | 1.091627  |
| 16 | -5.431864 | 0.247716  | -2.249895 |
| 8  | -4.330860 | 0.406542  | -3.211363 |
| 8  | -6.710861 | -0.327342 | -2.703605 |
| 6  | -5.831272 | 1.843740  | -1.528996 |
| 6  | -6.941776 | 2.538799  | -2.007679 |
| 6  | -4.988879 | 2.415348  | -0.571752 |
| 6  | -7.202683 | 3.822439  | -1.527030 |
| 1  | -7.594534 | 2.071935  | -2.737309 |
| 6  | -5.259231 | 3.698452  | -0.108112 |
| 1  | -4.146471 | 1.853551  | -0.189298 |
| 6  | -6.364607 | 4.423804  | -0.579183 |
| 1  | -8.070560 | 4.363152  | -1.895008 |
| 1  | -4.595527 | 4.146083  | 0.625699  |
| 6  | -5.102553 | -0.929505 | 1.431040  |
| 6  | -3.917432 | -0.384440 | 1.705878  |
| 1  | -5.748625 | -1.240229 | 2.248054  |
| 1  | -3.231820 | -0.062335 | 0.929813  |
| 1  | -3.570108 | -0.262943 | 2.726508  |
| 1  | -6.614782 | -0.558754 | 0.017996  |
| 6  | -6.626123 | 5.821456  | -0.074161 |
| 1  | -6.591160 | 5.862348  | 1.020333  |
| 1  | -5.867228 | 6.520675  | -0.446505 |
| 1  | -7.603935 | 6.192435  | -0.394386 |

-----  
**15**  
-----

Normal termination of Gaussian 09 at Sat Apr 20 09:24:28 2019.

Number of imaginary frequencies : 0

The smallest frequencies are : 37.1983 8.5783 8.2273 cm(-1)

S108

|                                              |                  |              |
|----------------------------------------------|------------------|--------------|
| Electronic energy :                          | HF=-3903.3191442 |              |
| Zero-point correction=                       |                  | 1.307903     |
| (Hartree/Particle)                           |                  |              |
| Thermal correction to Energy=                |                  | 1.374083     |
| Thermal correction to Enthalpy=              |                  | 1.375027     |
| Thermal correction to Gibbs Free Energy=     |                  | 1.203265     |
| Sum of electronic and zero-point Energies=   |                  | -3902.011241 |
| Sum of electronic and thermal Energies=      |                  | -3901.945061 |
| Sum of electronic and thermal Enthalpies=    |                  | -3901.944117 |
| Sum of electronic and thermal Free Energies= |                  | -3902.115879 |

.....  
 Cartesian Coordinates  
 .....

|    |          |           |           |
|----|----------|-----------|-----------|
| 28 | 0.793697 | 0.831612  | 0.614179  |
| 15 | 2.428571 | 1.430470  | -0.676355 |
| 6  | 3.993982 | 0.428025  | -0.394942 |
| 6  | 5.102348 | 0.580278  | -1.458908 |
| 6  | 4.582219 | 0.651109  | 1.015410  |
| 1  | 3.624879 | -0.605972 | -0.434822 |
| 6  | 6.266840 | -0.385010 | -1.182463 |
| 1  | 5.486845 | 1.607172  | -1.443718 |
| 1  | 4.711344 | 0.401837  | -2.465035 |
| 6  | 5.753713 | -0.303438 | 1.291301  |
| 1  | 4.946954 | 1.683886  | 1.101318  |
| 1  | 3.804838 | 0.522328  | 1.775052  |
| 6  | 6.847963 | -0.179708 | 0.222791  |
| 1  | 7.045260 | -0.248682 | -1.943381 |
| 1  | 5.903173 | -1.415282 | -1.277419 |
| 1  | 6.164649 | -0.099525 | 2.287574  |
| 1  | 5.377719 | -1.332762 | 1.304191  |
| 1  | 7.649474 | -0.904002 | 0.412318  |
| 1  | 7.304510 | 0.819005  | 0.283875  |
| 6  | 2.877774 | 3.223760  | -0.332522 |
| 6  | 3.697618 | 3.940221  | -1.425633 |
| 6  | 1.644743 | 4.070236  | 0.051142  |
| 1  | 3.499262 | 3.151777  | 0.569493  |
| 6  | 4.105520 | 5.351832  | -0.969776 |
| 1  | 3.097886 | 4.021001  | -2.341072 |
| 1  | 4.589722 | 3.366259  | -1.688390 |
| 6  | 2.053823 | 5.478649  | 0.505231  |
| 1  | 0.974853 | 4.156666  | -0.812102 |
| 1  | 1.074339 | 3.566833  | 0.836886  |
| 6  | 2.885433 | 6.192784  | -0.569427 |
| 1  | 4.669008 | 5.849729  | -1.767892 |
| 1  | 4.785175 | 5.268178  | -0.109830 |
| 1  | 1.157973 | 6.061487  | 0.751331  |
| 1  | 2.642745 | 5.400621  | 1.430186  |
| 1  | 3.202907 | 7.181008  | -0.215993 |
| 1  | 2.258280 | 6.361551  | -1.456839 |
| 6  | 2.092354 | 1.303033  | -2.508586 |
| 6  | 1.884981 | -0.169860 | -2.915566 |
| 6  | 0.865848 | 2.139414  | -2.931742 |
| 1  | 2.976277 | 1.695259  | -3.028604 |
| 6  | 1.628623 | -0.302017 | -4.423886 |
| 1  | 1.026430 | -0.563353 | -2.360411 |
| 1  | 2.741693 | -0.785667 | -2.625513 |
| 6  | 0.613110 | 2.017832  | -4.443017 |

|    |           |           |           |
|----|-----------|-----------|-----------|
| 1  | -0.011992 | 1.783344  | -2.379019 |
| 1  | 1.006014  | 3.192824  | -2.670064 |
| 6  | 0.437729  | 0.555342  | -4.871812 |
| 1  | 1.451200  | -1.353987 | -4.677020 |
| 1  | 2.533387  | 0.006781  | -4.967927 |
| 1  | -0.273662 | 2.603066  | -4.715773 |
| 1  | 1.461973  | 2.462086  | -4.983472 |
| 1  | 0.313834  | 0.491540  | -5.959434 |
| 1  | -0.480872 | 0.150276  | -4.432523 |
| 7  | -0.676820 | 0.534924  | 1.829256  |
| 6  | -0.983392 | 0.270642  | 3.237039  |
| 6  | -0.633642 | -1.218547 | 3.566769  |
| 6  | 0.849422  | -1.593364 | 3.384528  |
| 6  | -1.160335 | -1.722048 | 4.931815  |
| 1  | -1.197078 | -1.758151 | 2.795967  |
| 6  | 1.737681  | -1.231766 | 4.582232  |
| 1  | 1.234232  | -1.138849 | 2.467149  |
| 1  | 0.895897  | -2.683758 | 3.245750  |
| 6  | -0.242842 | -1.457947 | 6.141064  |
| 1  | -2.162842 | -1.315812 | 5.120556  |
| 1  | -1.287324 | -2.809738 | 4.842599  |
| 6  | 1.207504  | -1.883174 | 5.867254  |
| 1  | 1.768078  | -0.142313 | 4.702484  |
| 1  | 2.767720  | -1.556197 | 4.386696  |
| 1  | -0.637577 | -1.992341 | 7.014079  |
| 1  | -0.251998 | -0.395033 | 6.407455  |
| 1  | 1.843323  | -1.627523 | 6.723659  |
| 1  | 1.251164  | -2.977034 | 5.758240  |
| 16 | -1.859132 | 0.754398  | 0.783008  |
| 8  | -1.077850 | 0.646877  | -0.522856 |
| 8  | -3.042765 | -0.097583 | 0.991647  |
| 6  | -0.419219 | 1.323908  | 4.162522  |
| 6  | 0.225592  | 2.433610  | 3.802587  |
| 1  | -0.622494 | 1.150829  | 5.216467  |
| 1  | 0.561748  | 3.152763  | 4.544781  |
| 1  | 0.440578  | 2.646951  | 2.762026  |
| 1  | -2.076150 | 0.315595  | 3.367141  |
| 7  | -1.572100 | -2.093170 | -1.974119 |
| 1  | -1.069319 | -1.205531 | -1.982514 |
| 6  | -1.561551 | -2.620427 | -0.581490 |
| 6  | -2.393949 | -3.924743 | -0.400383 |
| 6  | -1.952192 | -5.127290 | -1.264349 |
| 6  | -2.547712 | -4.307987 | 1.091790  |
| 1  | -3.394864 | -3.650065 | -0.740749 |
| 6  | -0.854457 | -6.013908 | -0.649492 |
| 1  | -1.652826 | -4.769165 | -2.253075 |
| 1  | -2.841777 | -5.749901 | -1.428461 |
| 6  | -1.421495 | -5.182909 | 1.665689  |
| 1  | -2.682581 | -3.402417 | 1.697486  |
| 1  | -3.483387 | -4.876015 | 1.185336  |
| 6  | -1.188880 | -6.422585 | 0.791397  |
| 1  | 0.104693  | -5.487372 | -0.654133 |
| 1  | -0.724093 | -6.906002 | -1.275123 |
| 1  | -1.679938 | -5.477216 | 2.690875  |
| 1  | -0.485725 | -4.615470 | 1.734222  |
| 1  | -0.384743 | -7.039904 | 1.210480  |
| 1  | -2.098066 | -7.041922 | 0.795687  |

|    |           |           |           |
|----|-----------|-----------|-----------|
| 16 | -2.945225 | -1.863958 | -2.916276 |
| 8  | -2.439879 | -1.133857 | -4.088979 |
| 8  | -3.623711 | -3.154606 | -3.076161 |
| 6  | -4.064911 | -0.760600 | -2.055705 |
| 6  | -5.107191 | -1.280638 | -1.290603 |
| 6  | -3.868803 | 0.618765  | -2.162715 |
| 6  | -5.956595 | -0.403892 | -0.617551 |
| 1  | -5.261368 | -2.352609 | -1.240380 |
| 6  | -4.728193 | 1.478445  | -1.487822 |
| 1  | -3.057806 | 1.005705  | -2.768149 |
| 6  | -5.781139 | 0.982221  | -0.703970 |
| 1  | -6.768526 | -0.804457 | -0.016446 |
| 1  | -4.574455 | 2.551615  | -1.558655 |
| 6  | -0.112829 | -2.751739 | -0.173929 |
| 6  | 0.905573  | -2.965696 | -1.021979 |
| 1  | 0.059168  | -2.698042 | 0.895930  |
| 1  | 0.675879  | -3.006155 | -2.084180 |
| 1  | -2.033202 | -1.885935 | 0.075896  |
| 1  | 1.803185  | 0.998790  | 1.605551  |
| 6  | -2.460205 | 2.445465  | 0.825959  |
| 6  | -1.844899 | 3.423716  | 0.045392  |
| 6  | -3.500959 | 2.774817  | 1.695820  |
| 6  | -2.276194 | 4.744978  | 0.142727  |
| 1  | -1.053707 | 3.142019  | -0.638009 |
| 6  | -3.914110 | 4.102741  | 1.789372  |
| 1  | -3.997207 | 1.997627  | 2.266453  |
| 6  | -3.308100 | 5.108136  | 1.020762  |
| 1  | -1.806706 | 5.506461  | -0.474875 |
| 1  | -4.725968 | 4.361606  | 2.464105  |
| 6  | 2.308689  | -3.235104 | -0.680208 |
| 6  | 3.219167  | -3.491295 | -1.723132 |
| 6  | 2.787510  | -3.307778 | 0.642431  |
| 6  | 4.547780  | -3.824953 | -1.459293 |
| 1  | 2.869921  | -3.444152 | -2.751363 |
| 6  | 4.112035  | -3.645565 | 0.906433  |
| 1  | 2.117903  | -3.106913 | 1.469075  |
| 6  | 5.000797  | -3.909582 | -0.141227 |
| 1  | 5.226795  | -4.025084 | -2.283436 |
| 1  | 4.452969  | -3.705356 | 1.936333  |
| 1  | 6.033011  | -4.173573 | 0.069156  |
| 6  | -6.708071 | 1.933303  | 0.010241  |
| 1  | -6.152675 | 2.772814  | 0.439574  |
| 1  | -7.449662 | 2.353188  | -0.681099 |
| 1  | -7.254914 | 1.435757  | 0.816521  |
| 6  | -3.740084 | 6.547166  | 1.153542  |
| 1  | -4.805365 | 6.627579  | 1.390622  |
| 1  | -3.188899 | 7.045994  | 1.960668  |
| 1  | -3.551937 | 7.110128  | 0.234412  |
